# Supplementary material for: High-resolution Fourier-transform infrared spectroscopy of the ν2 fundamental band of thionyl fluoride, SOF2Electronic supplementary information (ESI) available: Tables S1 and S2. See http://www.rsc.org/suppdata/cp/b2/b210153j/
Source: Royal Society of Chemistry journal article supplement (doi:10.1039/b210153j), 2003-01-02
Supplement: b210153jesi.doc [file b210153jesi.doc]

*Electronic Supplementary Information for*

High-resolution Fourier-transform infrared spectroscopy
of the 2 fundamental band of thionyl fluoride, SOF2

Cari J. Davies*a*, David A. Newnham*b* and David M. Smith**a*

a School of Chemistry, University of Exeter, Stocker Road, Exeter, EX4 4QD, U.K.
Fax: + (1392) 263434; Tel: +(1392) 263409; E-mail: [David.M.Smith@ex.ac.uk](mailto:David.M.Smith@ex.ac.uk)

b Atmospheric Science Division, Space Science and Technology Department, Rutherford Appleton Laboratory, Chilton, Didcot, Oxfordshire, OX11 0QX, U.K

.

**Table S1** Assignments and observed and calculated transition wavenumbers for least-squares fit of 32S16OF2 2 fundamental band data.

**Table S2** Choleski decomposition of fitted parameter correlation matrix for least-squares fit of 32S16OF2 2 fundamental band data.

| ***J'*** | ***Ka'*** | ***Kc'*** | ***v*2*'*** | ***J"*** | ***Ka"*** | ***Kc"*** | ***v*2*"*** | **Obs / cm–1** | **Calc / cm–1** | **Obs – Calc / cm–1** |
| --- | --- | --- | --- | --- | --- | --- | --- | --- | --- | --- |
| 44 | 0 | 44 | 1 | 45 | 0 | 45 | 0 | 792.8072 | 792.8093 | -0.0021 |
| 38 | 8 | 30 | 1 | 39 | 8 | 31 | 0 | 793.0440 | 793.0451 | -0.0011 |
| 38 | 7 | 31 | 1 | 39 | 7 | 32 | 0 | 793.2818 | 793.2817 | 0.0001 |
| 42 | 2 | 41 | 1 | 43 | 2 | 42 | 0 | 793.2818 | 793.2844 | -0.0026 |
| 42 | 1 | 41 | 1 | 43 | 1 | 42 | 0 | 793.2818 | 793.2844 | -0.0026 |
| 37 | 8 | 29 | 1 | 38 | 8 | 30 | 0 | 793.4002 | 793.3997 | 0.0005 |
| 41 | 3 | 39 | 1 | 42 | 3 | 40 | 0 | 793.4002 | 793.4023 | -0.0021 |
| 41 | 2 | 39 | 1 | 42 | 2 | 40 | 0 | 793.4002 | 793.4023 | -0.0021 |
| 38 | 6 | 32 | 1 | 39 | 6 | 33 | 0 | 793.5175 | 793.5185 | -0.0010 |
| 40 | 4 | 37 | 1 | 41 | 4 | 38 | 0 | 793.5218 | 793.5202 | 0.0016 |
| 40 | 3 | 37 | 1 | 41 | 3 | 38 | 0 | 793.5218 | 793.5202 | 0.0016 |
| 42 | 1 | 42 | 1 | 43 | 1 | 43 | 0 | 793.5250 | 793.5235 | 0.0015 |
| 42 | 0 | 42 | 1 | 43 | 0 | 43 | 0 | 793.5250 | 793.5235 | 0.0015 |
| 37 | 7 | 30 | 1 | 38 | 7 | 31 | 0 | 793.6348 | 793.6363 | -0.0015 |
| 39 | 5 | 35 | 1 | 40 | 5 | 36 | 0 | 793.6391 | 793.6380 | 0.0011 |
| 39 | 4 | 35 | 1 | 40 | 4 | 36 | 0 | 793.6391 | 793.6380 | 0.0011 |
| 41 | 2 | 40 | 1 | 42 | 2 | 41 | 0 | 793.6391 | 793.6408 | -0.0017 |
| 41 | 1 | 40 | 1 | 42 | 1 | 41 | 0 | 793.6391 | 793.6408 | -0.0017 |
| 36 | 8 | 28 | 1 | 37 | 8 | 29 | 0 | 793.7519 | 793.7537 | -0.0018 |
| 40 | 3 | 38 | 1 | 41 | 3 | 39 | 0 | 793.7564 | 793.7583 | -0.0019 |
| 40 | 2 | 38 | 1 | 41 | 2 | 39 | 0 | 793.7564 | 793.7583 | -0.0019 |
| 37 | 7 | 31 | 1 | 38 | 7 | 32 | 0 | 793.8726 | 793.8731 | -0.0005 |
| 37 | 6 | 31 | 1 | 38 | 6 | 32 | 0 | 793.8726 | 793.8731 | -0.0005 |
| 39 | 4 | 36 | 1 | 40 | 4 | 37 | 0 | 793.8758 | 793.8756 | 0.0002 |
| 39 | 3 | 36 | 1 | 40 | 3 | 37 | 0 | 793.8758 | 793.8756 | 0.0002 |
| 41 | 1 | 41 | 1 | 42 | 1 | 42 | 0 | 793.8780 | 793.8798 | -0.0018 |
| 41 | 0 | 41 | 1 | 42 | 0 | 42 | 0 | 793.8780 | 793.8798 | -0.0018 |
| 36 | 8 | 29 | 1 | 37 | 8 | 30 | 0 | 793.9899 | 793.9903 | -0.0004 |
| 36 | 7 | 29 | 1 | 37 | 7 | 30 | 0 | 793.9899 | 793.9903 | -0.0004 |
| 38 | 5 | 34 | 1 | 39 | 5 | 35 | 0 | 793.9931 | 793.9930 | 0.0001 |
| 38 | 4 | 34 | 1 | 39 | 4 | 35 | 0 | 793.9931 | 793.9930 | 0.0001 |
| 40 | 2 | 39 | 1 | 41 | 2 | 40 | 0 | 793.9953 | 793.9967 | -0.0014 |
| 40 | 1 | 39 | 1 | 41 | 1 | 40 | 0 | 793.9953 | 793.9967 | -0.0014 |
| 35 | 9 | 27 | 1 | 36 | 9 | 28 | 0 | 794.1072 | 794.1072 | 0.0000 |
| 35 | 8 | 27 | 1 | 36 | 8 | 28 | 0 | 794.1072 | 794.1072 | 0.0000 |
| 37 | 6 | 32 | 1 | 38 | 6 | 33 | 0 | 794.1072 | 794.1101 | -0.0029 |
| 37 | 5 | 32 | 1 | 38 | 5 | 33 | 0 | 794.1072 | 794.1101 | -0.0029 |
| 39 | 3 | 37 | 1 | 40 | 3 | 38 | 0 | 794.1158 | 794.1137 | 0.0021 |
| 39 | 2 | 37 | 1 | 40 | 2 | 38 | 0 | 794.1158 | 794.1137 | 0.0021 |
| 34 | 10 | 25 | 1 | 35 | 10 | 26 | 0 | 794.2234 | 794.2238 | -0.0004 |
| 34 | 9 | 25 | 1 | 35 | 9 | 26 | 0 | 794.2234 | 794.2238 | -0.0004 |
| 36 | 7 | 30 | 1 | 37 | 7 | 31 | 0 | 794.2266 | 794.2270 | -0.0004 |
| 36 | 6 | 30 | 1 | 37 | 6 | 31 | 0 | 794.2266 | 794.2270 | -0.0004 |
| 38 | 4 | 35 | 1 | 39 | 4 | 36 | 0 | 794.2299 | 794.2306 | -0.0007 |
| 38 | 3 | 35 | 1 | 39 | 3 | 36 | 0 | 794.2299 | 794.2306 | -0.0007 |
| 40 | 1 | 40 | 1 | 41 | 1 | 41 | 0 | 794.2342 | 794.2355 | -0.0013 |
| 40 | 0 | 40 | 1 | 41 | 0 | 41 | 0 | 794.2342 | 794.2355 | -0.0013 |
| 33 | 11 | 23 | 1 | 34 | 11 | 24 | 0 | 794.3396 | 794.3399 | -0.0003 |
| 33 | 10 | 23 | 1 | 34 | 10 | 24 | 0 | 794.3396 | 794.3399 | -0.0003 |
| 35 | 8 | 28 | 1 | 36 | 8 | 29 | 0 | 794.3439 | 794.3437 | 0.0002 |
| 35 | 7 | 28 | 1 | 36 | 7 | 29 | 0 | 794.3439 | 794.3437 | 0.0002 |
| 37 | 5 | 33 | 1 | 38 | 5 | 34 | 0 | 794.3472 | 794.3474 | -0.0002 |
| 37 | 4 | 33 | 1 | 38 | 4 | 34 | 0 | 794.3472 | 794.3474 | -0.0002 |
| 39 | 2 | 38 | 1 | 40 | 2 | 39 | 0 | 794.3504 | 794.3520 | -0.0016 |
| 39 | 1 | 38 | 1 | 40 | 1 | 39 | 0 | 794.3504 | 794.3520 | -0.0016 |
| 32 | 12 | 21 | 1 | 33 | 12 | 22 | 0 | 794.4559 | 794.4556 | 0.0003 |
| 32 | 11 | 21 | 1 | 33 | 11 | 22 | 0 | 794.4559 | 794.4556 | 0.0003 |
| 34 | 9 | 26 | 1 | 35 | 9 | 27 | 0 | 794.4602 | 794.4601 | 0.0001 |
| 34 | 8 | 26 | 1 | 35 | 8 | 27 | 0 | 794.4602 | 794.4601 | 0.0001 |
| 36 | 6 | 31 | 1 | 37 | 6 | 32 | 0 | 794.4634 | 794.4640 | -0.0006 |
| 36 | 5 | 31 | 1 | 37 | 5 | 32 | 0 | 794.4634 | 794.4640 | -0.0006 |
| 38 | 3 | 36 | 1 | 39 | 3 | 37 | 0 | 794.4677 | 794.4685 | -0.0008 |
| 38 | 2 | 36 | 1 | 39 | 2 | 37 | 0 | 794.4677 | 794.4685 | -0.0008 |
| 31 | 13 | 19 | 1 | 32 | 13 | 20 | 0 | 794.5710 | 794.5708 | 0.0002 |
| 31 | 12 | 19 | 1 | 32 | 12 | 20 | 0 | 794.5710 | 794.5708 | 0.0002 |
| 33 | 10 | 24 | 1 | 34 | 10 | 25 | 0 | 794.5753 | 794.5761 | -0.0008 |
| 33 | 9 | 24 | 1 | 34 | 9 | 25 | 0 | 794.5753 | 794.5761 | -0.0008 |
| 35 | 7 | 29 | 1 | 36 | 7 | 30 | 0 | 794.5796 | 794.5804 | -0.0008 |
| 35 | 6 | 29 | 1 | 36 | 6 | 30 | 0 | 794.5796 | 794.5804 | -0.0008 |
| 37 | 4 | 34 | 1 | 38 | 4 | 35 | 0 | 794.5850 | 794.5849 | 0.0001 |
| 37 | 3 | 34 | 1 | 38 | 3 | 35 | 0 | 794.5850 | 794.5849 | 0.0001 |
| 39 | 1 | 39 | 1 | 40 | 1 | 40 | 0 | 794.5893 | 794.5907 | -0.0014 |
| 39 | 0 | 39 | 1 | 40 | 0 | 40 | 0 | 794.5893 | 794.5907 | -0.0014 |
| 30 | 14 | 17 | 1 | 31 | 14 | 18 | 0 | 794.6851 | 794.6854 | -0.0003 |
| 30 | 13 | 17 | 1 | 31 | 13 | 18 | 0 | 794.6851 | 794.6854 | -0.0003 |
| 32 | 11 | 22 | 1 | 33 | 11 | 23 | 0 | 794.6915 | 794.6916 | -0.0001 |
| 32 | 10 | 22 | 1 | 33 | 10 | 23 | 0 | 794.6915 | 794.6916 | -0.0001 |
| 34 | 8 | 27 | 1 | 35 | 8 | 28 | 0 | 794.6958 | 794.6966 | -0.0008 |
| 34 | 7 | 27 | 1 | 35 | 7 | 28 | 0 | 794.6958 | 794.6966 | -0.0008 |
| 36 | 5 | 32 | 1 | 37 | 5 | 33 | 0 | 794.7012 | 794.7012 | 0.0000 |
| 36 | 4 | 32 | 1 | 37 | 4 | 33 | 0 | 794.7012 | 794.7012 | 0.0000 |
| 38 | 2 | 37 | 1 | 39 | 2 | 38 | 0 | 794.7066 | 794.7067 | -0.0001 |
| 38 | 1 | 37 | 1 | 39 | 1 | 38 | 0 | 794.7066 | 794.7067 | -0.0001 |
| 29 | 15 | 15 | 1 | 30 | 15 | 16 | 0 | 794.7992 | 794.7992 | 0.0000 |
| 29 | 14 | 15 | 1 | 30 | 14 | 16 | 0 | 794.7992 | 794.7992 | 0.0000 |
| 31 | 12 | 20 | 1 | 32 | 12 | 21 | 0 | 794.8067 | 794.8068 | -0.0001 |
| 31 | 11 | 20 | 1 | 32 | 11 | 21 | 0 | 794.8067 | 794.8068 | -0.0001 |
| 33 | 9 | 25 | 1 | 34 | 9 | 26 | 0 | 794.8121 | 794.8124 | -0.0003 |
| 33 | 8 | 25 | 1 | 34 | 8 | 26 | 0 | 794.8121 | 794.8124 | -0.0003 |
| 35 | 6 | 30 | 1 | 36 | 6 | 31 | 0 | 794.8175 | 794.8173 | 0.0002 |
| 35 | 5 | 30 | 1 | 36 | 5 | 31 | 0 | 794.8175 | 794.8173 | 0.0002 |
| 37 | 3 | 35 | 1 | 38 | 3 | 36 | 0 | 794.8218 | 794.8227 | -0.0009 |
| 37 | 2 | 35 | 1 | 38 | 2 | 36 | 0 | 794.8218 | 794.8227 | -0.0009 |
| 28 | 16 | 13 | 1 | 29 | 16 | 14 | 0 | 794.9122 | 794.9120 | 0.0002 |
| 28 | 15 | 13 | 1 | 29 | 15 | 14 | 0 | 794.9122 | 794.9120 | 0.0002 |
| 30 | 13 | 18 | 1 | 31 | 13 | 19 | 0 | 794.9208 | 794.9213 | -0.0005 |
| 30 | 12 | 18 | 1 | 31 | 12 | 19 | 0 | 794.9208 | 794.9213 | -0.0005 |
| 32 | 10 | 23 | 1 | 33 | 10 | 24 | 0 | 794.9272 | 794.9278 | -0.0006 |
| 32 | 9 | 23 | 1 | 33 | 9 | 24 | 0 | 794.9272 | 794.9278 | -0.0006 |
| 34 | 7 | 28 | 1 | 35 | 7 | 29 | 0 | 794.9326 | 794.9332 | -0.0006 |
| 34 | 6 | 28 | 1 | 35 | 6 | 29 | 0 | 794.9326 | 794.9332 | -0.0006 |
| 36 | 4 | 33 | 1 | 37 | 4 | 34 | 0 | 794.9380 | 794.9387 | -0.0007 |
| 36 | 3 | 33 | 1 | 37 | 3 | 34 | 0 | 794.9380 | 794.9387 | -0.0007 |
| 38 | 1 | 38 | 1 | 39 | 1 | 39 | 0 | 794.9434 | 794.9453 | -0.0019 |
| 38 | 0 | 38 | 1 | 39 | 0 | 39 | 0 | 794.9434 | 794.9453 | -0.0019 |
| 27 | 17 | 11 | 1 | 28 | 17 | 12 | 0 | 795.0241 | 795.0232 | 0.0009 |
| 27 | 16 | 11 | 1 | 28 | 16 | 12 | 0 | 795.0241 | 795.0232 | 0.0009 |
| 29 | 14 | 16 | 1 | 30 | 14 | 17 | 0 | 795.0348 | 795.0352 | -0.0004 |
| 29 | 13 | 16 | 1 | 30 | 13 | 17 | 0 | 795.0348 | 795.0352 | -0.0004 |
| 31 | 11 | 21 | 1 | 32 | 11 | 22 | 0 | 795.0424 | 795.0428 | -0.0004 |
| 31 | 10 | 21 | 1 | 32 | 10 | 22 | 0 | 795.0424 | 795.0428 | -0.0004 |
| 33 | 8 | 26 | 1 | 34 | 8 | 27 | 0 | 795.0488 | 795.0488 | 0.0000 |
| 33 | 7 | 26 | 1 | 34 | 7 | 27 | 0 | 795.0488 | 795.0488 | 0.0000 |
| 35 | 5 | 31 | 1 | 36 | 5 | 32 | 0 | 795.0542 | 795.0545 | -0.0003 |
| 35 | 4 | 31 | 1 | 36 | 4 | 32 | 0 | 795.0542 | 795.0545 | -0.0003 |
| 37 | 2 | 36 | 1 | 38 | 2 | 37 | 0 | 795.0596 | 795.0609 | -0.0013 |
| 37 | 1 | 36 | 1 | 38 | 1 | 37 | 0 | 795.0596 | 795.0609 | -0.0013 |
| 28 | 15 | 14 | 1 | 29 | 15 | 15 | 0 | 795.1478 | 795.1484 | -0.0006 |
| 28 | 14 | 14 | 1 | 29 | 14 | 15 | 0 | 795.1478 | 795.1484 | -0.0006 |
| 30 | 12 | 19 | 1 | 31 | 12 | 20 | 0 | 795.1575 | 795.1573 | 0.0002 |
| 30 | 11 | 19 | 1 | 31 | 11 | 20 | 0 | 795.1575 | 795.1573 | 0.0002 |
| 32 | 9 | 24 | 1 | 33 | 9 | 25 | 0 | 795.1640 | 795.1640 | 0.0000 |
| 32 | 8 | 24 | 1 | 33 | 8 | 25 | 0 | 795.1640 | 795.1640 | 0.0000 |
| 34 | 6 | 29 | 1 | 35 | 6 | 30 | 0 | 795.1694 | 795.1701 | -0.0007 |
| 34 | 5 | 29 | 1 | 35 | 5 | 30 | 0 | 795.1694 | 795.1701 | -0.0007 |
| 36 | 3 | 34 | 1 | 37 | 3 | 35 | 0 | 795.1758 | 795.1764 | -0.0006 |
| 36 | 2 | 34 | 1 | 37 | 2 | 35 | 0 | 795.1758 | 795.1764 | -0.0006 |
| 27 | 16 | 12 | 1 | 28 | 16 | 13 | 0 | 795.2598 | 795.2603 | -0.0005 |
| 27 | 15 | 12 | 1 | 28 | 15 | 13 | 0 | 795.2598 | 795.2603 | -0.0005 |
| 29 | 13 | 17 | 1 | 30 | 13 | 18 | 0 | 795.2716 | 795.2712 | 0.0004 |
| 29 | 12 | 17 | 1 | 30 | 12 | 18 | 0 | 795.2716 | 795.2712 | 0.0004 |
| 31 | 10 | 22 | 1 | 32 | 10 | 23 | 0 | 795.2791 | 795.2789 | 0.0002 |
| 31 | 9 | 22 | 1 | 32 | 9 | 23 | 0 | 795.2791 | 795.2789 | 0.0002 |
| 33 | 7 | 27 | 1 | 34 | 7 | 28 | 0 | 795.2856 | 795.2854 | 0.0002 |
| 33 | 6 | 27 | 1 | 34 | 6 | 28 | 0 | 795.2856 | 795.2854 | 0.0002 |
| 35 | 4 | 32 | 1 | 36 | 4 | 33 | 0 | 795.2920 | 795.2919 | 0.0001 |
| 35 | 3 | 32 | 1 | 36 | 3 | 33 | 0 | 795.2920 | 795.2919 | 0.0001 |
| 37 | 1 | 37 | 1 | 38 | 1 | 38 | 0 | 795.2985 | 795.2993 | -0.0008 |
| 37 | 0 | 37 | 1 | 38 | 0 | 38 | 0 | 795.2985 | 795.2993 | -0.0008 |
| 26 | 16 | 10 | 1 | 27 | 16 | 11 | 0 | 795.3706 | 795.3703 | 0.0003 |
| 28 | 14 | 15 | 1 | 29 | 14 | 16 | 0 | 795.3846 | 795.3845 | 0.0001 |
| 28 | 13 | 15 | 1 | 29 | 13 | 16 | 0 | 795.3846 | 795.3845 | 0.0001 |
| 30 | 11 | 20 | 1 | 31 | 11 | 21 | 0 | 795.3932 | 795.3933 | -0.0001 |
| 30 | 10 | 20 | 1 | 31 | 10 | 21 | 0 | 795.3932 | 795.3933 | -0.0001 |
| 32 | 8 | 25 | 1 | 33 | 8 | 26 | 0 | 795.4007 | 795.4005 | 0.0002 |
| 32 | 7 | 25 | 1 | 33 | 7 | 26 | 0 | 795.4007 | 795.4005 | 0.0002 |
| 34 | 5 | 30 | 1 | 35 | 5 | 31 | 0 | 795.4072 | 795.4072 | 0.0000 |
| 34 | 4 | 30 | 1 | 35 | 4 | 31 | 0 | 795.4072 | 795.4072 | 0.0000 |
| 36 | 2 | 35 | 1 | 37 | 2 | 36 | 0 | 795.4136 | 795.4145 | -0.0009 |
| 36 | 1 | 35 | 1 | 37 | 1 | 36 | 0 | 795.4136 | 795.4145 | -0.0009 |
| 27 | 15 | 13 | 1 | 28 | 15 | 14 | 0 | 795.4976 | 795.4968 | 0.0008 |
| 27 | 14 | 13 | 1 | 28 | 14 | 14 | 0 | 795.4976 | 795.4968 | 0.0008 |
| 29 | 12 | 18 | 1 | 30 | 12 | 19 | 0 | 795.5073 | 795.5072 | 0.0001 |
| 29 | 11 | 18 | 1 | 30 | 11 | 19 | 0 | 795.5073 | 795.5072 | 0.0001 |
| 31 | 9 | 23 | 1 | 32 | 9 | 24 | 0 | 795.5148 | 795.5151 | -0.0003 |
| 31 | 8 | 23 | 1 | 32 | 8 | 24 | 0 | 795.5148 | 795.5151 | -0.0003 |
| 33 | 6 | 28 | 1 | 34 | 6 | 29 | 0 | 795.5223 | 795.5223 | 0.0000 |
| 33 | 5 | 28 | 1 | 34 | 5 | 29 | 0 | 795.5223 | 795.5223 | 0.0000 |
| 35 | 3 | 33 | 1 | 36 | 3 | 34 | 0 | 795.5288 | 795.5296 | -0.0008 |
| 35 | 2 | 33 | 1 | 36 | 2 | 34 | 0 | 795.5288 | 795.5296 | -0.0008 |
| 26 | 16 | 11 | 1 | 27 | 16 | 12 | 0 | 795.6084 | 795.6078 | 0.0006 |
| 26 | 15 | 11 | 1 | 27 | 15 | 12 | 0 | 795.6084 | 795.6078 | 0.0006 |
| 28 | 13 | 16 | 1 | 29 | 13 | 17 | 0 | 795.6203 | 795.6205 | -0.0002 |
| 28 | 12 | 16 | 1 | 29 | 12 | 17 | 0 | 795.6203 | 795.6205 | -0.0002 |
| 30 | 10 | 21 | 1 | 31 | 10 | 22 | 0 | 795.6289 | 795.6294 | -0.0005 |
| 30 | 9 | 21 | 1 | 31 | 9 | 22 | 0 | 795.6289 | 795.6294 | -0.0005 |
| 32 | 7 | 26 | 1 | 33 | 7 | 27 | 0 | 795.6375 | 795.6370 | 0.0005 |
| 32 | 6 | 26 | 1 | 33 | 6 | 27 | 0 | 795.6375 | 795.6370 | 0.0005 |
| 34 | 4 | 31 | 1 | 35 | 4 | 32 | 0 | 795.6439 | 795.6445 | -0.0006 |
| 34 | 3 | 31 | 1 | 35 | 3 | 32 | 0 | 795.6439 | 795.6445 | -0.0006 |
| 36 | 1 | 36 | 1 | 37 | 1 | 37 | 0 | 795.6515 | 795.6528 | -0.0013 |
| 36 | 0 | 36 | 1 | 37 | 0 | 37 | 0 | 795.6515 | 795.6528 | -0.0013 |
| 25 | 17 | 9 | 1 | 26 | 17 | 10 | 0 | 795.7160 | 795.7162 | -0.0002 |
| 25 | 16 | 9 | 1 | 26 | 16 | 10 | 0 | 795.7160 | 795.7162 | -0.0002 |
| 27 | 14 | 14 | 1 | 28 | 14 | 15 | 0 | 795.7333 | 795.7331 | 0.0002 |
| 27 | 13 | 14 | 1 | 28 | 13 | 15 | 0 | 795.7333 | 795.7331 | 0.0002 |
| 29 | 11 | 19 | 1 | 30 | 11 | 20 | 0 | 795.7429 | 795.7432 | -0.0003 |
| 29 | 10 | 19 | 1 | 30 | 10 | 20 | 0 | 795.7429 | 795.7432 | -0.0003 |
| 31 | 8 | 24 | 1 | 32 | 8 | 25 | 0 | 795.7516 | 795.7515 | 0.0001 |
| 31 | 7 | 24 | 1 | 32 | 7 | 25 | 0 | 795.7516 | 795.7515 | 0.0001 |
| 33 | 5 | 29 | 1 | 34 | 5 | 30 | 0 | 795.7591 | 795.7593 | -0.0002 |
| 33 | 4 | 29 | 1 | 34 | 4 | 30 | 0 | 795.7591 | 795.7593 | -0.0002 |
| 35 | 2 | 34 | 1 | 36 | 2 | 35 | 0 | 795.7666 | 795.7675 | -0.0009 |
| 35 | 1 | 34 | 1 | 36 | 1 | 35 | 0 | 795.7666 | 795.7675 | -0.0009 |
| 26 | 15 | 12 | 1 | 27 | 15 | 13 | 0 | 795.8452 | 795.8446 | 0.0006 |
| 26 | 14 | 12 | 1 | 27 | 14 | 13 | 0 | 795.8452 | 795.8446 | 0.0006 |
| 28 | 12 | 17 | 1 | 29 | 12 | 18 | 0 | 795.8570 | 795.8565 | 0.0005 |
| 28 | 11 | 17 | 1 | 29 | 11 | 18 | 0 | 795.8570 | 795.8565 | 0.0005 |
| 30 | 9 | 22 | 1 | 31 | 9 | 23 | 0 | 795.8656 | 795.8656 | 0.0000 |
| 30 | 8 | 22 | 1 | 31 | 8 | 23 | 0 | 795.8656 | 795.8656 | 0.0000 |
| 32 | 6 | 27 | 1 | 33 | 6 | 28 | 0 | 795.8742 | 795.8738 | 0.0004 |
| 32 | 5 | 27 | 1 | 33 | 5 | 28 | 0 | 795.8742 | 795.8738 | 0.0004 |
| 34 | 3 | 32 | 1 | 35 | 3 | 33 | 0 | 795.8818 | 795.8821 | -0.0003 |
| 34 | 2 | 32 | 1 | 35 | 2 | 33 | 0 | 795.8818 | 795.8821 | -0.0003 |
| 25 | 15 | 10 | 1 | 26 | 15 | 11 | 0 | 795.9549 | 795.9545 | 0.0004 |
| 25 | 16 | 10 | 1 | 26 | 16 | 11 | 0 | 795.9549 | 795.9545 | 0.0004 |
| 27 | 13 | 15 | 1 | 28 | 13 | 16 | 0 | 795.9689 | 795.9692 | -0.0003 |
| 27 | 12 | 15 | 1 | 28 | 12 | 16 | 0 | 795.9689 | 795.9692 | -0.0003 |
| 29 | 10 | 20 | 1 | 30 | 10 | 21 | 0 | 795.9797 | 795.9793 | 0.0004 |
| 29 | 9 | 20 | 1 | 30 | 9 | 21 | 0 | 795.9797 | 795.9793 | 0.0004 |
| 31 | 7 | 25 | 1 | 32 | 7 | 26 | 0 | 795.9883 | 795.9881 | 0.0002 |
| 31 | 6 | 25 | 1 | 32 | 6 | 26 | 0 | 795.9883 | 795.9881 | 0.0002 |
| 33 | 4 | 30 | 1 | 34 | 4 | 31 | 0 | 795.9958 | 795.9965 | -0.0007 |
| 33 | 3 | 30 | 1 | 34 | 3 | 31 | 0 | 795.9958 | 795.9965 | -0.0007 |
| 35 | 1 | 35 | 1 | 36 | 1 | 36 | 0 | 796.0045 | 796.0057 | -0.0012 |
| 35 | 0 | 35 | 1 | 36 | 0 | 36 | 0 | 796.0045 | 796.0057 | -0.0012 |
| 24 | 16 | 8 | 1 | 25 | 16 | 9 | 0 | 796.0604 | 796.0606 | -0.0002 |
| 24 | 17 | 8 | 1 | 25 | 17 | 9 | 0 | 796.0604 | 796.0607 | -0.0003 |
| 26 | 14 | 13 | 1 | 27 | 14 | 14 | 0 | 796.0809 | 796.0810 | -0.0001 |
| 26 | 13 | 13 | 1 | 27 | 13 | 14 | 0 | 796.0809 | 796.0810 | -0.0001 |
| 28 | 11 | 18 | 1 | 29 | 11 | 19 | 0 | 796.0927 | 796.0925 | 0.0002 |
| 28 | 10 | 18 | 1 | 29 | 10 | 19 | 0 | 796.0927 | 796.0925 | 0.0002 |
| 30 | 8 | 23 | 1 | 31 | 8 | 24 | 0 | 796.1013 | 796.1020 | -0.0007 |
| 30 | 7 | 23 | 1 | 31 | 7 | 24 | 0 | 796.1013 | 796.1020 | -0.0007 |
| 32 | 5 | 28 | 1 | 33 | 5 | 29 | 0 | 796.1110 | 796.1108 | 0.0002 |
| 32 | 4 | 28 | 1 | 33 | 4 | 29 | 0 | 796.1110 | 796.1108 | 0.0002 |
| 34 | 2 | 33 | 1 | 35 | 2 | 34 | 0 | 796.1196 | 796.1199 | -0.0003 |
| 34 | 1 | 33 | 1 | 35 | 1 | 34 | 0 | 796.1196 | 796.1199 | -0.0003 |
| 23 | 17 | 6 | 1 | 24 | 17 | 7 | 0 | 796.1487 | 796.1494 | -0.0007 |
| 23 | 18 | 6 | 1 | 24 | 18 | 7 | 0 | 796.1594 | 796.1599 | -0.0005 |
| 25 | 15 | 11 | 1 | 26 | 15 | 12 | 0 | 796.1917 | 796.1917 | 0.0000 |
| 25 | 14 | 11 | 1 | 26 | 14 | 12 | 0 | 796.1917 | 796.1917 | 0.0000 |
| 27 | 12 | 16 | 1 | 28 | 12 | 17 | 0 | 796.2046 | 796.2052 | -0.0006 |
| 27 | 11 | 16 | 1 | 28 | 11 | 17 | 0 | 796.2046 | 796.2052 | -0.0006 |
| 29 | 9 | 21 | 1 | 30 | 9 | 22 | 0 | 796.2154 | 796.2155 | -0.0001 |
| 29 | 8 | 21 | 1 | 30 | 8 | 22 | 0 | 796.2154 | 796.2155 | -0.0001 |
| 31 | 6 | 26 | 1 | 32 | 6 | 27 | 0 | 796.2251 | 796.2248 | 0.0003 |
| 31 | 5 | 26 | 1 | 32 | 5 | 27 | 0 | 796.2251 | 796.2248 | 0.0003 |
| 33 | 3 | 31 | 1 | 34 | 3 | 32 | 0 | 796.2337 | 796.2340 | -0.0003 |
| 33 | 2 | 31 | 1 | 34 | 2 | 32 | 0 | 796.2337 | 796.2340 | -0.0003 |
| 24 | 16 | 9 | 1 | 25 | 16 | 10 | 0 | 796.3004 | 796.3002 | 0.0002 |
| 24 | 15 | 9 | 1 | 25 | 15 | 10 | 0 | 796.3004 | 796.3002 | 0.0002 |
| 26 | 13 | 14 | 1 | 27 | 13 | 15 | 0 | 796.3176 | 796.3172 | 0.0004 |
| 26 | 12 | 14 | 1 | 27 | 12 | 15 | 0 | 796.3176 | 796.3172 | 0.0004 |
| 28 | 10 | 19 | 1 | 29 | 10 | 20 | 0 | 796.3284 | 796.3286 | -0.0002 |
| 28 | 9 | 19 | 1 | 29 | 9 | 20 | 0 | 796.3284 | 796.3286 | -0.0002 |
| 30 | 7 | 24 | 1 | 31 | 7 | 25 | 0 | 796.3381 | 796.3385 | -0.0004 |
| 30 | 6 | 24 | 1 | 31 | 6 | 25 | 0 | 796.3381 | 796.3385 | -0.0004 |
| 32 | 4 | 29 | 1 | 33 | 4 | 30 | 0 | 796.3477 | 796.3480 | -0.0003 |
| 32 | 3 | 29 | 1 | 33 | 3 | 30 | 0 | 796.3477 | 796.3480 | -0.0003 |
| 34 | 1 | 34 | 1 | 35 | 1 | 35 | 0 | 796.3574 | 796.3581 | -0.0007 |
| 34 | 0 | 34 | 1 | 35 | 0 | 35 | 0 | 796.3574 | 796.3581 | -0.0007 |
| 25 | 13 | 12 | 1 | 26 | 13 | 13 | 0 | 796.4285 | 796.4283 | 0.0002 |
| 27 | 11 | 17 | 1 | 28 | 11 | 18 | 0 | 796.4414 | 796.4412 | 0.0002 |
| 27 | 10 | 17 | 1 | 28 | 10 | 18 | 0 | 796.4414 | 796.4412 | 0.0002 |
| 29 | 8 | 22 | 1 | 30 | 8 | 23 | 0 | 796.4521 | 796.4518 | 0.0003 |
| 29 | 7 | 22 | 1 | 30 | 7 | 23 | 0 | 796.4521 | 796.4518 | 0.0003 |
| 31 | 5 | 27 | 1 | 32 | 5 | 28 | 0 | 796.4618 | 796.4617 | 0.0001 |
| 31 | 4 | 27 | 1 | 32 | 4 | 28 | 0 | 796.4618 | 796.4617 | 0.0001 |
| 33 | 2 | 32 | 1 | 34 | 2 | 33 | 0 | 796.4715 | 796.4718 | -0.0003 |
| 33 | 1 | 32 | 1 | 34 | 1 | 33 | 0 | 796.4715 | 796.4718 | -0.0003 |
| 22 | 17 | 5 | 1 | 23 | 17 | 6 | 0 | 796.5232 | 796.5238 | -0.0006 |
| 24 | 14 | 10 | 1 | 25 | 14 | 11 | 0 | 796.5382 | 796.5380 | 0.0002 |
| 24 | 15 | 10 | 1 | 25 | 15 | 11 | 0 | 796.5382 | 796.5380 | 0.0002 |
| 26 | 12 | 15 | 1 | 27 | 12 | 16 | 0 | 796.5533 | 796.5533 | 0.0000 |
| 26 | 11 | 15 | 1 | 27 | 11 | 16 | 0 | 796.5533 | 796.5533 | 0.0000 |
| 28 | 9 | 20 | 1 | 29 | 9 | 21 | 0 | 796.5651 | 796.5648 | 0.0003 |
| 28 | 8 | 20 | 1 | 29 | 8 | 21 | 0 | 796.5651 | 796.5648 | 0.0003 |
| 30 | 6 | 25 | 1 | 31 | 6 | 26 | 0 | 796.5748 | 796.5752 | -0.0004 |
| 30 | 5 | 25 | 1 | 31 | 5 | 26 | 0 | 796.5748 | 796.5752 | -0.0004 |
| 32 | 3 | 30 | 1 | 33 | 3 | 31 | 0 | 796.5856 | 796.5854 | 0.0002 |
| 32 | 2 | 30 | 1 | 33 | 2 | 31 | 0 | 796.5856 | 796.5854 | 0.0002 |
| 23 | 15 | 8 | 1 | 24 | 15 | 9 | 0 | 796.6448 | 796.6445 | 0.0003 |
| 23 | 16 | 8 | 1 | 24 | 16 | 9 | 0 | 796.6448 | 796.6446 | 0.0002 |
| 25 | 13 | 13 | 1 | 26 | 13 | 14 | 0 | 796.6641 | 796.6646 | -0.0005 |
| 25 | 12 | 13 | 1 | 26 | 12 | 14 | 0 | 796.6641 | 796.6646 | -0.0005 |
| 27 | 10 | 18 | 1 | 28 | 10 | 19 | 0 | 796.6770 | 796.6773 | -0.0003 |
| 27 | 9 | 18 | 1 | 28 | 9 | 19 | 0 | 796.6770 | 796.6773 | -0.0003 |
| 29 | 7 | 23 | 1 | 30 | 7 | 24 | 0 | 796.6889 | 796.6883 | 0.0006 |
| 29 | 6 | 23 | 1 | 30 | 6 | 24 | 0 | 796.6889 | 796.6883 | 0.0006 |
| 31 | 4 | 28 | 1 | 32 | 4 | 29 | 0 | 796.6986 | 796.6988 | -0.0002 |
| 31 | 3 | 28 | 1 | 32 | 3 | 29 | 0 | 796.6986 | 796.6988 | -0.0002 |
| 33 | 1 | 33 | 1 | 34 | 1 | 34 | 0 | 796.7093 | 796.7098 | -0.0005 |
| 33 | 0 | 33 | 1 | 34 | 0 | 34 | 0 | 796.7093 | 796.7098 | -0.0005 |
| 21 | 17 | 4 | 1 | 22 | 17 | 5 | 0 | 796.7115 | 796.7110 | 0.0005 |
| 22 | 16 | 6 | 1 | 23 | 16 | 7 | 0 | 796.7373 | 796.7383 | -0.0010 |
| 24 | 14 | 11 | 1 | 25 | 14 | 12 | 0 | 796.7750 | 796.7749 | 0.0001 |
| 24 | 13 | 11 | 1 | 25 | 13 | 12 | 0 | 796.7750 | 796.7749 | 0.0001 |
| 26 | 11 | 16 | 1 | 27 | 11 | 17 | 0 | 796.7890 | 796.7893 | -0.0003 |
| 26 | 10 | 16 | 1 | 27 | 10 | 17 | 0 | 796.7890 | 796.7893 | -0.0003 |
| 28 | 8 | 21 | 1 | 29 | 8 | 22 | 0 | 796.8008 | 796.8011 | -0.0003 |
| 28 | 7 | 21 | 1 | 29 | 7 | 22 | 0 | 796.8008 | 796.8011 | -0.0003 |
| 30 | 5 | 26 | 1 | 31 | 5 | 27 | 0 | 796.8116 | 796.8120 | -0.0004 |
| 30 | 4 | 26 | 1 | 31 | 4 | 27 | 0 | 796.8116 | 796.8120 | -0.0004 |
| 32 | 2 | 31 | 1 | 33 | 2 | 32 | 0 | 796.8223 | 796.8231 | -0.0008 |
| 32 | 1 | 31 | 1 | 33 | 1 | 32 | 0 | 796.8223 | 796.8231 | -0.0008 |
| 23 | 15 | 9 | 1 | 24 | 15 | 10 | 0 | 796.8837 | 796.8833 | 0.0004 |
| 23 | 14 | 9 | 1 | 24 | 14 | 10 | 0 | 796.8837 | 796.8833 | 0.0004 |
| 25 | 12 | 14 | 1 | 26 | 12 | 15 | 0 | 796.9009 | 796.9007 | 0.0002 |
| 25 | 11 | 14 | 1 | 26 | 11 | 15 | 0 | 796.9009 | 796.9007 | 0.0002 |
| 19 | 19 | 1 | 1 | 20 | 19 | 2 | 0 | 796.9009 | 796.9024 | -0.0015 |
| 27 | 9 | 19 | 1 | 28 | 9 | 20 | 0 | 796.9138 | 796.9135 | 0.0003 |
| 27 | 8 | 19 | 1 | 28 | 8 | 20 | 0 | 796.9138 | 796.9135 | 0.0003 |
| 29 | 6 | 24 | 1 | 30 | 6 | 25 | 0 | 796.9246 | 796.9249 | -0.0003 |
| 29 | 5 | 24 | 1 | 30 | 5 | 25 | 0 | 796.9246 | 796.9249 | -0.0003 |
| 31 | 3 | 29 | 1 | 32 | 3 | 30 | 0 | 796.9364 | 796.9362 | 0.0002 |
| 31 | 2 | 29 | 1 | 32 | 2 | 30 | 0 | 796.9364 | 796.9362 | 0.0002 |
| 22 | 15 | 7 | 1 | 23 | 15 | 8 | 0 | 796.9870 | 796.9874 | -0.0004 |
| 24 | 13 | 12 | 1 | 25 | 13 | 13 | 0 | 797.0117 | 797.0113 | 0.0004 |
| 24 | 12 | 12 | 1 | 25 | 12 | 13 | 0 | 797.0117 | 797.0113 | 0.0004 |
| 26 | 10 | 17 | 1 | 27 | 10 | 18 | 0 | 797.0257 | 797.0254 | 0.0003 |
| 26 | 9 | 17 | 1 | 27 | 9 | 18 | 0 | 797.0257 | 797.0254 | 0.0003 |
| 28 | 7 | 22 | 1 | 29 | 7 | 23 | 0 | 797.0376 | 797.0375 | 0.0001 |
| 28 | 6 | 22 | 1 | 29 | 6 | 23 | 0 | 797.0376 | 797.0375 | 0.0001 |
| 30 | 4 | 27 | 1 | 31 | 4 | 28 | 0 | 797.0494 | 797.0491 | 0.0003 |
| 30 | 3 | 27 | 1 | 31 | 3 | 28 | 0 | 797.0494 | 797.0491 | 0.0003 |
| 32 | 1 | 32 | 1 | 33 | 1 | 33 | 0 | 797.0602 | 797.0610 | -0.0008 |
| 32 | 0 | 32 | 1 | 33 | 0 | 33 | 0 | 797.0602 | 797.0610 | -0.0008 |
| 23 | 13 | 10 | 1 | 24 | 13 | 11 | 0 | 797.1204 | 797.1207 | -0.0003 |
| 23 | 14 | 10 | 1 | 24 | 14 | 11 | 0 | 797.1204 | 797.1207 | -0.0003 |
| 25 | 11 | 15 | 1 | 26 | 11 | 16 | 0 | 797.1366 | 797.1368 | -0.0002 |
| 25 | 10 | 15 | 1 | 26 | 10 | 16 | 0 | 797.1366 | 797.1368 | -0.0002 |
| 27 | 8 | 20 | 1 | 28 | 8 | 21 | 0 | 797.1495 | 797.1497 | -0.0002 |
| 27 | 7 | 20 | 1 | 28 | 7 | 21 | 0 | 797.1495 | 797.1497 | -0.0002 |
| 29 | 5 | 25 | 1 | 30 | 5 | 26 | 0 | 797.1613 | 797.1617 | -0.0004 |
| 29 | 4 | 25 | 1 | 30 | 4 | 26 | 0 | 797.1613 | 797.1617 | -0.0004 |
| 31 | 2 | 30 | 1 | 32 | 2 | 31 | 0 | 797.1732 | 797.1738 | -0.0006 |
| 31 | 1 | 30 | 1 | 32 | 1 | 31 | 0 | 797.1732 | 797.1738 | -0.0006 |
| 22 | 14 | 8 | 1 | 23 | 14 | 9 | 0 | 797.2270 | 797.2275 | -0.0005 |
| 22 | 15 | 8 | 1 | 23 | 15 | 9 | 0 | 797.2270 | 797.2275 | -0.0005 |
| 24 | 12 | 13 | 1 | 25 | 12 | 14 | 0 | 797.2474 | 797.2475 | -0.0001 |
| 24 | 11 | 13 | 1 | 25 | 11 | 14 | 0 | 797.2474 | 797.2475 | -0.0001 |
| 26 | 9 | 18 | 1 | 27 | 9 | 19 | 0 | 797.2614 | 797.2615 | -0.0001 |
| 26 | 8 | 18 | 1 | 27 | 8 | 19 | 0 | 797.2614 | 797.2615 | -0.0001 |
| 28 | 6 | 23 | 1 | 29 | 6 | 24 | 0 | 797.2743 | 797.2741 | 0.0002 |
| 28 | 5 | 23 | 1 | 29 | 5 | 24 | 0 | 797.2743 | 797.2741 | 0.0002 |
| 30 | 3 | 28 | 1 | 31 | 3 | 29 | 0 | 797.2862 | 797.2864 | -0.0002 |
| 30 | 2 | 28 | 1 | 31 | 2 | 29 | 0 | 797.2862 | 797.2864 | -0.0002 |
| 20 | 16 | 4 | 1 | 21 | 16 | 5 | 0 | 797.3184 | 797.3193 | -0.0009 |
| 21 | 15 | 6 | 1 | 22 | 15 | 7 | 0 | 797.3281 | 797.3248 | 0.0033 |
| 23 | 12 | 11 | 1 | 24 | 12 | 12 | 0 | 797.3572 | 797.3574 | -0.0002 |
| 23 | 13 | 11 | 1 | 24 | 13 | 12 | 0 | 797.3572 | 797.3574 | -0.0002 |
| 25 | 10 | 16 | 1 | 26 | 10 | 17 | 0 | 797.3733 | 797.3729 | 0.0004 |
| 25 | 9 | 16 | 1 | 26 | 9 | 17 | 0 | 797.3733 | 797.3729 | 0.0004 |
| 27 | 7 | 21 | 1 | 28 | 7 | 22 | 0 | 797.3862 | 797.3861 | 0.0001 |
| 27 | 6 | 21 | 1 | 28 | 6 | 22 | 0 | 797.3862 | 797.3861 | 0.0001 |
| 29 | 4 | 26 | 1 | 30 | 4 | 27 | 0 | 797.3991 | 797.3987 | 0.0004 |
| 29 | 3 | 26 | 1 | 30 | 3 | 27 | 0 | 797.3991 | 797.3987 | 0.0004 |
| 31 | 1 | 31 | 1 | 32 | 1 | 32 | 0 | 797.4110 | 797.4116 | -0.0006 |
| 31 | 0 | 31 | 1 | 32 | 0 | 32 | 0 | 797.4110 | 797.4116 | -0.0006 |
| 19 | 17 | 3 | 1 | 20 | 17 | 4 | 0 | 797.4336 | 797.4336 | 0.0000 |
| 22 | 14 | 9 | 1 | 23 | 14 | 10 | 0 | 797.4659 | 797.4656 | 0.0003 |
| 22 | 13 | 9 | 1 | 23 | 13 | 10 | 0 | 797.4659 | 797.4656 | 0.0003 |
| 24 | 11 | 14 | 1 | 25 | 11 | 15 | 0 | 797.4842 | 797.4836 | 0.0006 |
| 24 | 10 | 14 | 1 | 25 | 10 | 15 | 0 | 797.4842 | 797.4836 | 0.0006 |
| 18 | 18 | 1 | 1 | 19 | 18 | 2 | 0 | 797.4940 | 797.4934 | 0.0006 |
| 18 | 18 | 1 | 1 | 19 | 18 | 2 | 0 | 797.4940 | 797.4934 | 0.0006 |
| 26 | 8 | 19 | 1 | 27 | 8 | 20 | 0 | 797.4982 | 797.4978 | 0.0004 |
| 26 | 7 | 19 | 1 | 27 | 7 | 20 | 0 | 797.4982 | 797.4978 | 0.0004 |
| 28 | 5 | 24 | 1 | 29 | 5 | 25 | 0 | 797.5111 | 797.5109 | 0.0002 |
| 28 | 4 | 24 | 1 | 29 | 4 | 25 | 0 | 797.5111 | 797.5109 | 0.0002 |
| 30 | 2 | 29 | 1 | 31 | 2 | 30 | 0 | 797.5240 | 797.5239 | 0.0001 |
| 30 | 1 | 29 | 1 | 31 | 1 | 30 | 0 | 797.5240 | 797.5239 | 0.0001 |
| 21 | 14 | 7 | 1 | 22 | 14 | 8 | 0 | 797.5703 | 797.5703 | 0.0000 |
| 23 | 12 | 12 | 1 | 24 | 12 | 13 | 0 | 797.5939 | 797.5937 | 0.0002 |
| 23 | 11 | 12 | 1 | 24 | 11 | 13 | 0 | 797.5939 | 797.5937 | 0.0002 |
| 25 | 9 | 17 | 1 | 26 | 9 | 18 | 0 | 797.6090 | 797.6090 | 0.0000 |
| 25 | 8 | 17 | 1 | 26 | 8 | 18 | 0 | 797.6090 | 797.6090 | 0.0000 |
| 27 | 6 | 22 | 1 | 28 | 6 | 23 | 0 | 797.6230 | 797.6227 | 0.0003 |
| 27 | 5 | 22 | 1 | 28 | 5 | 23 | 0 | 797.6230 | 797.6227 | 0.0003 |
| 29 | 3 | 27 | 1 | 30 | 3 | 28 | 0 | 797.6359 | 797.6359 | 0.0000 |
| 29 | 2 | 27 | 1 | 30 | 2 | 28 | 0 | 797.6359 | 797.6359 | 0.0000 |
| 20 | 17 | 3 | 1 | 21 | 17 | 4 | 0 | 797.6510 | 797.6496 | 0.0014 |
| 19 | 17 | 2 | 1 | 20 | 17 | 3 | 0 | 797.6510 | 797.6505 | 0.0005 |
| 20 | 15 | 5 | 1 | 21 | 15 | 6 | 0 | 797.6770 | 797.6775 | -0.0005 |
| 22 | 13 | 10 | 1 | 23 | 13 | 11 | 0 | 797.7026 | 797.7027 | -0.0001 |
| 22 | 12 | 10 | 1 | 23 | 12 | 11 | 0 | 797.7026 | 797.7027 | -0.0001 |
| 24 | 10 | 15 | 1 | 25 | 10 | 16 | 0 | 797.7198 | 797.7197 | 0.0001 |
| 24 | 9 | 15 | 1 | 25 | 9 | 16 | 0 | 797.7198 | 797.7197 | 0.0001 |
| 26 | 7 | 20 | 1 | 27 | 7 | 21 | 0 | 797.7338 | 797.7341 | -0.0003 |
| 26 | 6 | 20 | 1 | 27 | 6 | 21 | 0 | 797.7338 | 797.7341 | -0.0003 |
| 28 | 4 | 25 | 1 | 29 | 4 | 26 | 0 | 797.7478 | 797.7478 | 0.0000 |
| 28 | 3 | 25 | 1 | 29 | 3 | 26 | 0 | 797.7478 | 797.7478 | 0.0000 |
| 30 | 1 | 30 | 1 | 31 | 1 | 31 | 0 | 797.7607 | 797.7616 | -0.0009 |
| 30 | 0 | 30 | 1 | 31 | 0 | 31 | 0 | 797.7607 | 797.7616 | -0.0009 |
| 21 | 13 | 8 | 1 | 22 | 13 | 9 | 0 | 797.8092 | 797.8096 | -0.0004 |
| 23 | 11 | 13 | 1 | 24 | 11 | 14 | 0 | 797.8296 | 797.8298 | -0.0002 |
| 23 | 10 | 13 | 1 | 24 | 10 | 14 | 0 | 797.8296 | 797.8298 | -0.0002 |
| 25 | 8 | 18 | 1 | 26 | 8 | 19 | 0 | 797.8458 | 797.8452 | 0.0006 |
| 25 | 7 | 18 | 1 | 26 | 7 | 19 | 0 | 797.8458 | 797.8452 | 0.0006 |
| 27 | 5 | 23 | 1 | 28 | 5 | 24 | 0 | 797.8597 | 797.8594 | 0.0003 |
| 27 | 4 | 23 | 1 | 28 | 4 | 24 | 0 | 797.8597 | 797.8594 | 0.0003 |
| 29 | 2 | 28 | 1 | 30 | 2 | 29 | 0 | 797.8737 | 797.8734 | 0.0003 |
| 29 | 1 | 28 | 1 | 30 | 1 | 29 | 0 | 797.8737 | 797.8734 | 0.0003 |
| 20 | 14 | 6 | 1 | 21 | 14 | 7 | 0 | 797.9103 | 797.9094 | 0.0009 |
| 19 | 15 | 4 | 1 | 20 | 15 | 5 | 0 | 797.9286 | 797.9263 | 0.0023 |
| 19 | 18 | 2 | 1 | 20 | 18 | 3 | 0 | 797.9340 | 797.9353 | -0.0013 |
| 22 | 12 | 11 | 1 | 23 | 12 | 12 | 0 | 797.9394 | 797.9392 | 0.0002 |
| 22 | 11 | 11 | 1 | 23 | 11 | 12 | 0 | 797.9394 | 797.9392 | 0.0002 |
| 24 | 9 | 16 | 1 | 25 | 9 | 17 | 0 | 797.9555 | 797.9558 | -0.0003 |
| 24 | 8 | 16 | 1 | 25 | 8 | 17 | 0 | 797.9555 | 797.9558 | -0.0003 |
| 26 | 6 | 21 | 1 | 27 | 6 | 22 | 0 | 797.9706 | 797.9706 | 0.0000 |
| 26 | 5 | 21 | 1 | 27 | 5 | 22 | 0 | 797.9706 | 797.9706 | 0.0000 |
| 28 | 3 | 26 | 1 | 29 | 3 | 27 | 0 | 797.9846 | 797.9849 | -0.0003 |
| 28 | 2 | 26 | 1 | 29 | 2 | 27 | 0 | 797.9846 | 797.9849 | -0.0003 |
| 19 | 16 | 4 | 1 | 20 | 16 | 5 | 0 | 798.0427 | 798.0424 | 0.0003 |
| 21 | 13 | 9 | 1 | 22 | 13 | 10 | 0 | 798.0470 | 798.0472 | -0.0002 |
| 21 | 12 | 9 | 1 | 22 | 12 | 10 | 0 | 798.0470 | 798.0472 | -0.0002 |
| 23 | 10 | 14 | 1 | 24 | 10 | 15 | 0 | 798.0664 | 798.0659 | 0.0005 |
| 23 | 9 | 14 | 1 | 24 | 9 | 15 | 0 | 798.0664 | 798.0659 | 0.0005 |
| 18 | 16 | 3 | 1 | 19 | 16 | 4 | 0 | 798.0696 | 798.0707 | -0.0011 |
| 18 | 16 | 3 | 1 | 19 | 16 | 4 | 0 | 798.0696 | 798.0707 | -0.0011 |
| 25 | 7 | 19 | 1 | 26 | 7 | 20 | 0 | 798.0814 | 798.0815 | -0.0001 |
| 25 | 6 | 19 | 1 | 26 | 6 | 20 | 0 | 798.0814 | 798.0815 | -0.0001 |
| 17 | 17 | 1 | 1 | 18 | 17 | 2 | 0 | 798.0836 | 798.0857 | -0.0021 |
| 17 | 17 | 1 | 1 | 18 | 17 | 2 | 0 | 798.0836 | 798.0857 | -0.0021 |
| 27 | 4 | 24 | 1 | 28 | 4 | 25 | 0 | 798.0965 | 798.0962 | 0.0003 |
| 27 | 3 | 24 | 1 | 28 | 3 | 25 | 0 | 798.0965 | 798.0962 | 0.0003 |
| 29 | 1 | 29 | 1 | 30 | 1 | 30 | 0 | 798.1105 | 798.1111 | -0.0006 |
| 29 | 0 | 29 | 1 | 30 | 0 | 30 | 0 | 798.1105 | 798.1111 | -0.0006 |
| 19 | 16 | 3 | 1 | 20 | 16 | 4 | 0 | 798.1277 | 798.1316 | -0.0039 |
| 20 | 13 | 7 | 1 | 21 | 13 | 8 | 0 | 798.1514 | 798.1523 | -0.0009 |
| 18 | 16 | 2 | 1 | 19 | 16 | 3 | 0 | 798.1751 | 798.1749 | 0.0002 |
| 22 | 11 | 12 | 1 | 23 | 11 | 13 | 0 | 798.1751 | 798.1754 | -0.0003 |
| 22 | 10 | 12 | 1 | 23 | 10 | 13 | 0 | 798.1751 | 798.1754 | -0.0003 |
| 24 | 8 | 17 | 1 | 25 | 8 | 18 | 0 | 798.1923 | 798.1920 | 0.0003 |
| 24 | 7 | 17 | 1 | 25 | 7 | 18 | 0 | 798.1923 | 798.1920 | 0.0003 |
| 26 | 5 | 22 | 1 | 27 | 5 | 23 | 0 | 798.2073 | 798.2073 | 0.0000 |
| 26 | 4 | 22 | 1 | 27 | 4 | 23 | 0 | 798.2073 | 798.2073 | 0.0000 |
| 28 | 2 | 27 | 1 | 29 | 2 | 28 | 0 | 798.2224 | 798.2223 | 0.0001 |
| 28 | 1 | 27 | 1 | 29 | 1 | 28 | 0 | 798.2224 | 798.2223 | 0.0001 |
| 19 | 15 | 5 | 1 | 20 | 15 | 6 | 0 | 798.2364 | 798.2351 | 0.0013 |
| 19 | 14 | 5 | 1 | 20 | 14 | 6 | 0 | 798.2590 | 798.2566 | 0.0024 |
| 21 | 11 | 10 | 1 | 22 | 11 | 11 | 0 | 798.2837 | 798.2839 | -0.0002 |
| 21 | 12 | 10 | 1 | 22 | 12 | 11 | 0 | 798.2837 | 798.2839 | -0.0002 |
| 23 | 9 | 15 | 1 | 24 | 9 | 16 | 0 | 798.3020 | 798.3020 | 0.0000 |
| 23 | 8 | 15 | 1 | 24 | 8 | 16 | 0 | 798.3020 | 798.3020 | 0.0000 |
| 25 | 6 | 20 | 1 | 26 | 6 | 21 | 0 | 798.3182 | 798.3180 | 0.0002 |
| 25 | 5 | 20 | 1 | 26 | 5 | 21 | 0 | 798.3182 | 798.3180 | 0.0002 |
| 27 | 3 | 25 | 1 | 28 | 3 | 26 | 0 | 798.3333 | 798.3333 | 0.0000 |
| 27 | 2 | 25 | 1 | 28 | 2 | 26 | 0 | 798.3333 | 798.3333 | 0.0000 |
| 18 | 17 | 2 | 1 | 19 | 17 | 2 | 0 | 798.3580 | 798.3572 | 0.0008 |
| 20 | 12 | 8 | 1 | 21 | 12 | 9 | 0 | 798.3903 | 798.3908 | -0.0005 |
| 20 | 13 | 8 | 1 | 21 | 13 | 9 | 0 | 798.3903 | 798.3908 | -0.0005 |
| 22 | 10 | 13 | 1 | 23 | 10 | 14 | 0 | 798.4118 | 798.4115 | 0.0003 |
| 22 | 9 | 13 | 1 | 23 | 9 | 14 | 0 | 798.4118 | 798.4115 | 0.0003 |
| 24 | 6 | 18 | 1 | 25 | 6 | 19 | 0 | 798.4290 | 798.4283 | 0.0007 |
| 24 | 6 | 18 | 1 | 25 | 6 | 19 | 0 | 798.4290 | 798.4283 | 0.0007 |
| 26 | 4 | 23 | 1 | 27 | 4 | 24 | 0 | 798.4441 | 798.4441 | 0.0000 |
| 26 | 3 | 23 | 1 | 27 | 3 | 24 | 0 | 798.4441 | 798.4441 | 0.0000 |
| 28 | 1 | 28 | 1 | 29 | 1 | 29 | 0 | 798.4592 | 798.4599 | -0.0007 |
| 28 | 0 | 28 | 1 | 29 | 0 | 29 | 0 | 798.4592 | 798.4599 | -0.0007 |
| 18 | 17 | 2 | 1 | 19 | 17 | 3 | 0 | 798.4667 | 798.4655 | 0.0012 |
| 19 | 13 | 6 | 1 | 20 | 13 | 7 | 0 | 798.4925 | 798.4923 | 0.0002 |
| 19 | 14 | 6 | 1 | 20 | 14 | 7 | 0 | 798.4925 | 798.4935 | -0.0010 |
| 21 | 11 | 11 | 1 | 22 | 11 | 12 | 0 | 798.5205 | 798.5203 | 0.0002 |
| 21 | 10 | 11 | 1 | 22 | 10 | 12 | 0 | 798.5205 | 798.5203 | 0.0002 |
| 18 | 14 | 4 | 1 | 19 | 14 | 5 | 0 | 798.5330 | 798.5300 | 0.0030 |
| 23 | 8 | 16 | 1 | 24 | 8 | 17 | 0 | 798.5388 | 798.5382 | 0.0006 |
| 23 | 7 | 16 | 1 | 24 | 7 | 17 | 0 | 798.5388 | 798.5382 | 0.0006 |
| 25 | 5 | 21 | 1 | 26 | 5 | 22 | 0 | 798.5549 | 798.5546 | 0.0003 |
| 25 | 4 | 21 | 1 | 26 | 4 | 22 | 0 | 798.5549 | 798.5546 | 0.0003 |
| 27 | 2 | 26 | 1 | 28 | 2 | 27 | 0 | 798.5700 | 798.5706 | -0.0006 |
| 27 | 1 | 26 | 1 | 28 | 1 | 27 | 0 | 798.5700 | 798.5706 | -0.0006 |
| 18 | 15 | 4 | 1 | 19 | 15 | 5 | 0 | 798.6141 | 798.6146 | -0.0005 |
| 18 | 15 | 4 | 1 | 19 | 15 | 5 | 0 | 798.6141 | 798.6146 | -0.0005 |
| 18 | 15 | 3 | 1 | 19 | 15 | 4 | 0 | 798.6249 | 798.6277 | -0.0028 |
| 20 | 12 | 9 | 1 | 21 | 12 | 10 | 0 | 798.6281 | 798.6280 | 0.0001 |
| 20 | 11 | 9 | 1 | 21 | 11 | 10 | 0 | 798.6281 | 798.6280 | 0.0001 |
| 22 | 9 | 14 | 1 | 23 | 9 | 15 | 0 | 798.6475 | 798.6476 | -0.0001 |
| 22 | 8 | 14 | 1 | 23 | 8 | 15 | 0 | 798.6475 | 798.6476 | -0.0001 |
| 24 | 6 | 19 | 1 | 25 | 6 | 20 | 0 | 798.6647 | 798.6647 | 0.0000 |
| 24 | 5 | 19 | 1 | 25 | 5 | 20 | 0 | 798.6647 | 798.6647 | 0.0000 |
| 16 | 16 | 1 | 1 | 17 | 16 | 2 | 0 | 798.6808 | 798.6798 | 0.0010 |
| 16 | 16 | 1 | 1 | 17 | 16 | 2 | 0 | 798.6808 | 798.6798 | 0.0010 |
| 26 | 3 | 24 | 1 | 27 | 3 | 25 | 0 | 798.6808 | 798.6811 | -0.0003 |
| 26 | 2 | 24 | 1 | 27 | 2 | 25 | 0 | 798.6808 | 798.6811 | -0.0003 |
| 17 | 15 | 3 | 1 | 18 | 15 | 4 | 0 | 798.7067 | 798.7042 | 0.0025 |
| 17 | 15 | 2 | 1 | 18 | 15 | 3 | 0 | 798.7067 | 798.7082 | -0.0015 |
| 19 | 13 | 7 | 1 | 20 | 13 | 8 | 0 | 798.7325 | 798.7332 | -0.0007 |
| 19 | 12 | 7 | 1 | 20 | 12 | 8 | 0 | 798.7325 | 798.7333 | -0.0008 |
| 21 | 10 | 12 | 1 | 22 | 10 | 13 | 0 | 798.7562 | 798.7565 | -0.0003 |
| 21 | 9 | 12 | 1 | 22 | 9 | 13 | 0 | 798.7562 | 798.7565 | -0.0003 |
| 23 | 7 | 17 | 1 | 24 | 7 | 18 | 0 | 798.7745 | 798.7745 | 0.0000 |
| 23 | 6 | 17 | 1 | 24 | 6 | 18 | 0 | 798.7745 | 798.7745 | 0.0000 |
| 25 | 4 | 22 | 1 | 26 | 4 | 23 | 0 | 798.7917 | 798.7913 | 0.0004 |
| 25 | 3 | 22 | 1 | 26 | 3 | 23 | 0 | 798.7917 | 798.7913 | 0.0004 |
| 27 | 1 | 27 | 1 | 28 | 1 | 28 | 0 | 798.8078 | 798.8081 | -0.0003 |
| 27 | 0 | 27 | 1 | 28 | 0 | 28 | 0 | 798.8078 | 798.8081 | -0.0003 |
| 18 | 14 | 5 | 1 | 19 | 14 | 6 | 0 | 798.8240 | 798.8234 | 0.0006 |
| 20 | 11 | 10 | 1 | 21 | 11 | 11 | 0 | 798.8649 | 798.8645 | 0.0004 |
| 20 | 10 | 10 | 1 | 21 | 10 | 11 | 0 | 798.8649 | 798.8645 | 0.0004 |
| 22 | 8 | 15 | 1 | 23 | 8 | 16 | 0 | 798.8842 | 798.8838 | 0.0004 |
| 22 | 7 | 15 | 1 | 23 | 7 | 16 | 0 | 798.8842 | 798.8838 | 0.0004 |
| 24 | 5 | 20 | 1 | 25 | 5 | 21 | 0 | 798.9015 | 798.9012 | 0.0003 |
| 24 | 4 | 20 | 1 | 25 | 4 | 21 | 0 | 798.9015 | 798.9012 | 0.0003 |
| 26 | 2 | 25 | 1 | 27 | 2 | 26 | 0 | 798.9187 | 798.9183 | 0.0004 |
| 26 | 1 | 25 | 1 | 27 | 1 | 26 | 0 | 798.9187 | 798.9183 | 0.0004 |
| 19 | 18 | 1 | 1 | 20 | 18 | 2 | 0 | 798.9660 | 798.9673 | -0.0013 |
| 19 | 11 | 8 | 1 | 20 | 11 | 9 | 0 | 798.9714 | 798.9712 | 0.0002 |
| 19 | 12 | 8 | 1 | 20 | 12 | 9 | 0 | 798.9714 | 798.9712 | 0.0002 |
| 21 | 9 | 13 | 1 | 22 | 9 | 14 | 0 | 798.9929 | 798.9926 | 0.0003 |
| 21 | 8 | 13 | 1 | 22 | 8 | 14 | 0 | 798.9929 | 798.9926 | 0.0003 |
| 23 | 6 | 18 | 1 | 24 | 6 | 19 | 0 | 799.0112 | 799.0108 | 0.0004 |
| 23 | 5 | 18 | 1 | 24 | 5 | 19 | 0 | 799.0112 | 799.0108 | 0.0004 |
| 25 | 3 | 23 | 1 | 26 | 3 | 24 | 0 | 799.0284 | 799.0283 | 0.0001 |
| 25 | 2 | 23 | 1 | 26 | 2 | 24 | 0 | 799.0284 | 799.0283 | 0.0001 |
| 17 | 17 | 0 | 1 | 18 | 17 | 1 | 0 | 799.0400 | 799.0390 | 0.0010 |
| 18 | 12 | 6 | 1 | 19 | 12 | 7 | 0 | 799.0736 | 799.0738 | -0.0002 |
| 18 | 13 | 6 | 1 | 19 | 13 | 7 | 0 | 799.0736 | 799.0744 | -0.0008 |
| 20 | 10 | 11 | 1 | 21 | 10 | 12 | 0 | 799.1005 | 799.1008 | -0.0003 |
| 20 | 9 | 11 | 1 | 21 | 9 | 12 | 0 | 799.1005 | 799.1008 | -0.0003 |
| 22 | 7 | 16 | 1 | 23 | 7 | 17 | 0 | 799.1199 | 799.1200 | -0.0001 |
| 22 | 6 | 16 | 1 | 23 | 6 | 17 | 0 | 799.1199 | 799.1200 | -0.0001 |
| 17 | 14 | 3 | 1 | 18 | 14 | 4 | 0 | 799.1382 | 799.1378 | 0.0004 |
| 24 | 4 | 21 | 1 | 25 | 4 | 22 | 0 | 799.1382 | 799.1379 | 0.0003 |
| 24 | 3 | 21 | 1 | 25 | 3 | 22 | 0 | 799.1382 | 799.1379 | 0.0003 |
| 26 | 1 | 26 | 1 | 27 | 1 | 27 | 0 | 799.1554 | 799.1557 | -0.0003 |
| 26 | 0 | 26 | 1 | 27 | 0 | 27 | 0 | 799.1554 | 799.1557 | -0.0003 |
| 17 | 14 | 4 | 1 | 18 | 14 | 5 | 0 | 799.1877 | 799.1884 | -0.0007 |
| 17 | 14 | 4 | 1 | 18 | 14 | 5 | 0 | 799.1877 | 799.1884 | -0.0007 |
| 19 | 11 | 9 | 1 | 20 | 11 | 10 | 0 | 799.2082 | 799.2080 | 0.0002 |
| 19 | 10 | 9 | 1 | 20 | 10 | 10 | 0 | 799.2082 | 799.2080 | 0.0002 |
| 21 | 8 | 14 | 1 | 22 | 8 | 15 | 0 | 799.2286 | 799.2287 | -0.0001 |
| 21 | 7 | 14 | 1 | 22 | 7 | 15 | 0 | 799.2286 | 799.2287 | -0.0001 |
| 23 | 5 | 19 | 1 | 24 | 5 | 20 | 0 | 799.2480 | 799.2473 | 0.0007 |
| 23 | 4 | 19 | 1 | 24 | 4 | 20 | 0 | 799.2480 | 799.2473 | 0.0007 |
| 25 | 2 | 24 | 1 | 26 | 2 | 25 | 0 | 799.2652 | 799.2654 | -0.0002 |
| 25 | 1 | 24 | 1 | 26 | 1 | 25 | 0 | 799.2652 | 799.2654 | -0.0002 |
| 15 | 15 | 1 | 1 | 16 | 15 | 2 | 0 | 799.2750 | 799.2761 | -0.0011 |
| 18 | 12 | 7 | 1 | 19 | 12 | 8 | 0 | 799.3136 | 799.3133 | 0.0003 |
| 18 | 11 | 7 | 1 | 19 | 11 | 8 | 0 | 799.3136 | 799.3134 | 0.0002 |
| 16 | 14 | 3 | 1 | 17 | 14 | 4 | 0 | 799.3298 | 799.3329 | -0.0031 |
| 16 | 14 | 3 | 1 | 17 | 14 | 4 | 0 | 799.3298 | 799.3329 | -0.0031 |
| 20 | 9 | 12 | 1 | 21 | 9 | 13 | 0 | 799.3373 | 799.3369 | 0.0004 |
| 20 | 8 | 12 | 1 | 21 | 8 | 13 | 0 | 799.3373 | 799.3369 | 0.0004 |
| 22 | 6 | 17 | 1 | 23 | 6 | 18 | 0 | 799.3567 | 799.3563 | 0.0004 |
| 22 | 5 | 17 | 1 | 23 | 5 | 18 | 0 | 799.3567 | 799.3563 | 0.0004 |
| 24 | 3 | 22 | 1 | 25 | 3 | 23 | 0 | 799.3750 | 799.3748 | 0.0002 |
| 24 | 2 | 22 | 1 | 25 | 2 | 23 | 0 | 799.3750 | 799.3748 | 0.0002 |
| 17 | 13 | 5 | 1 | 18 | 13 | 6 | 0 | 799.4083 | 799.4084 | -0.0001 |
| 17 | 13 | 5 | 1 | 18 | 13 | 6 | 0 | 799.4083 | 799.4084 | -0.0001 |
| 17 | 12 | 5 | 1 | 18 | 12 | 6 | 0 | 799.4148 | 799.4157 | -0.0009 |
| 19 | 10 | 10 | 1 | 20 | 10 | 11 | 0 | 799.4449 | 799.4444 | 0.0005 |
| 19 | 9 | 10 | 1 | 20 | 9 | 11 | 0 | 799.4449 | 799.4444 | 0.0005 |
| 21 | 7 | 15 | 1 | 22 | 7 | 16 | 0 | 799.4654 | 799.4649 | 0.0005 |
| 21 | 6 | 15 | 1 | 22 | 6 | 16 | 0 | 799.4654 | 799.4649 | 0.0005 |
| 23 | 4 | 20 | 1 | 24 | 4 | 21 | 0 | 799.4837 | 799.4840 | -0.0003 |
| 23 | 3 | 20 | 1 | 24 | 3 | 21 | 0 | 799.4837 | 799.4840 | -0.0003 |
| 25 | 1 | 25 | 1 | 26 | 1 | 26 | 0 | 799.5030 | 799.5027 | 0.0003 |
| 25 | 0 | 25 | 1 | 26 | 0 | 26 | 0 | 799.5030 | 799.5027 | 0.0003 |
| 16 | 15 | 2 | 1 | 17 | 15 | 3 | 0 | 799.5342 | 799.5324 | 0.0018 |
| 16 | 15 | 2 | 1 | 17 | 15 | 3 | 0 | 799.5342 | 799.5324 | 0.0018 |
| 18 | 10 | 8 | 1 | 19 | 10 | 9 | 0 | 799.5504 | 799.5507 | -0.0003 |
| 18 | 11 | 8 | 1 | 19 | 11 | 9 | 0 | 799.5504 | 799.5507 | -0.0003 |
| 16 | 16 | 0 | 1 | 17 | 16 | 1 | 0 | 799.5568 | 799.5565 | 0.0003 |
| 20 | 8 | 13 | 1 | 21 | 8 | 14 | 0 | 799.5730 | 799.5730 | 0.0000 |
| 20 | 7 | 13 | 1 | 21 | 7 | 14 | 0 | 799.5730 | 799.5730 | 0.0000 |
| 22 | 5 | 18 | 1 | 23 | 5 | 19 | 0 | 799.5934 | 799.5928 | 0.0006 |
| 22 | 4 | 18 | 1 | 23 | 4 | 19 | 0 | 799.5934 | 799.5928 | 0.0006 |
| 24 | 2 | 23 | 1 | 25 | 2 | 24 | 0 | 799.6117 | 799.6119 | -0.0002 |
| 24 | 1 | 23 | 1 | 25 | 1 | 24 | 0 | 799.6117 | 799.6119 | -0.0002 |
| 17 | 11 | 6 | 1 | 18 | 11 | 7 | 0 | 799.6537 | 799.6540 | -0.0003 |
| 17 | 12 | 6 | 1 | 18 | 12 | 7 | 0 | 799.6537 | 799.6543 | -0.0006 |
| 16 | 13 | 3 | 1 | 17 | 13 | 4 | 0 | 799.6601 | 799.6612 | -0.0011 |
| 19 | 9 | 11 | 1 | 20 | 9 | 12 | 0 | 799.6806 | 799.6806 | 0.0000 |
| 19 | 8 | 11 | 1 | 20 | 8 | 12 | 0 | 799.6806 | 799.6806 | 0.0000 |
| 21 | 6 | 16 | 1 | 22 | 6 | 17 | 0 | 799.7010 | 799.7012 | -0.0002 |
| 21 | 5 | 16 | 1 | 22 | 5 | 17 | 0 | 799.7010 | 799.7012 | -0.0002 |
| 23 | 3 | 21 | 1 | 24 | 3 | 22 | 0 | 799.7215 | 799.7208 | 0.0007 |
| 23 | 2 | 21 | 1 | 24 | 2 | 22 | 0 | 799.7215 | 799.7208 | 0.0007 |
| 16 | 13 | 4 | 1 | 17 | 13 | 5 | 0 | 799.7624 | 799.7634 | -0.0010 |
| 16 | 13 | 4 | 1 | 17 | 13 | 5 | 0 | 799.7624 | 799.7634 | -0.0010 |
| 18 | 10 | 9 | 1 | 19 | 10 | 10 | 0 | 799.7871 | 799.7874 | -0.0003 |
| 18 | 9 | 9 | 1 | 19 | 9 | 10 | 0 | 799.7871 | 799.7874 | -0.0003 |
| 15 | 13 | 2 | 1 | 16 | 13 | 3 | 0 | 799.8000 | 799.8028 | -0.0028 |
| 20 | 7 | 14 | 1 | 21 | 7 | 15 | 0 | 799.8097 | 799.8092 | 0.0005 |
| 20 | 6 | 14 | 1 | 21 | 6 | 15 | 0 | 799.8097 | 799.8092 | 0.0005 |
| 22 | 4 | 19 | 1 | 23 | 4 | 20 | 0 | 799.8291 | 799.8293 | -0.0002 |
| 22 | 3 | 19 | 1 | 23 | 3 | 20 | 0 | 799.8291 | 799.8293 | -0.0002 |
| 24 | 1 | 24 | 1 | 25 | 1 | 25 | 0 | 799.8496 | 799.8491 | 0.0005 |
| 24 | 0 | 24 | 1 | 25 | 0 | 25 | 0 | 799.8496 | 799.8491 | 0.0005 |
| 17 | 11 | 7 | 1 | 18 | 11 | 8 | 0 | 799.8926 | 799.8926 | 0.0000 |
| 17 | 10 | 7 | 1 | 18 | 10 | 8 | 0 | 799.8926 | 799.8926 | 0.0000 |
| 19 | 8 | 12 | 1 | 20 | 8 | 13 | 0 | 799.9173 | 799.9167 | 0.0006 |
| 19 | 7 | 12 | 1 | 20 | 7 | 13 | 0 | 799.9173 | 799.9167 | 0.0006 |
| 21 | 5 | 17 | 1 | 22 | 5 | 18 | 0 | 799.9378 | 799.9376 | 0.0002 |
| 21 | 4 | 17 | 1 | 22 | 4 | 18 | 0 | 799.9378 | 799.9376 | 0.0002 |
| 15 | 13 | 3 | 1 | 16 | 13 | 4 | 0 | 799.9540 | 799.9555 | -0.0015 |
| 23 | 2 | 22 | 1 | 24 | 2 | 23 | 0 | 799.9582 | 799.9577 | 0.0005 |
| 23 | 1 | 22 | 1 | 24 | 1 | 23 | 0 | 799.9582 | 799.9577 | 0.0005 |
| 16 | 12 | 5 | 1 | 17 | 12 | 6 | 0 | 799.9905 | 799.9908 | -0.0003 |
| 16 | 11 | 5 | 1 | 17 | 11 | 6 | 0 | 799.9938 | 799.9948 | -0.0010 |
| 18 | 9 | 10 | 1 | 19 | 9 | 11 | 0 | 800.0239 | 800.0236 | 0.0003 |
| 18 | 8 | 10 | 1 | 19 | 8 | 11 | 0 | 800.0239 | 800.0236 | 0.0003 |
| 20 | 6 | 15 | 1 | 21 | 6 | 16 | 0 | 800.0454 | 800.0454 | 0.0000 |
| 20 | 5 | 15 | 1 | 21 | 5 | 16 | 0 | 800.0454 | 800.0454 | 0.0000 |
| 22 | 3 | 20 | 1 | 23 | 3 | 21 | 0 | 800.0659 | 800.0661 | -0.0002 |
| 22 | 2 | 20 | 1 | 23 | 2 | 21 | 0 | 800.0659 | 800.0661 | -0.0002 |
| 15 | 15 | 0 | 1 | 16 | 15 | 1 | 0 | 800.0745 | 800.0724 | 0.0021 |
| 17 | 9 | 8 | 1 | 18 | 9 | 9 | 0 | 800.1294 | 800.1296 | -0.0002 |
| 17 | 10 | 8 | 1 | 18 | 10 | 9 | 0 | 800.1294 | 800.1296 | -0.0002 |
| 19 | 7 | 13 | 1 | 20 | 7 | 14 | 0 | 800.1530 | 800.1529 | 0.0001 |
| 19 | 6 | 13 | 1 | 20 | 6 | 14 | 0 | 800.1530 | 800.1529 | 0.0001 |
| 21 | 4 | 18 | 1 | 22 | 4 | 19 | 0 | 800.1746 | 800.1741 | 0.0005 |
| 21 | 3 | 18 | 1 | 22 | 3 | 19 | 0 | 800.1746 | 800.1741 | 0.0005 |
| 23 | 1 | 23 | 1 | 24 | 1 | 24 | 0 | 800.1950 | 800.1949 | 0.0001 |
| 23 | 0 | 23 | 1 | 24 | 0 | 24 | 0 | 800.1950 | 800.1949 | 0.0001 |
| 15 | 12 | 3 | 1 | 16 | 12 | 4 | 0 | 800.1950 | 800.1965 | -0.0015 |
| 16 | 10 | 6 | 1 | 17 | 10 | 7 | 0 | 800.2327 | 800.2332 | -0.0005 |
| 16 | 11 | 6 | 1 | 17 | 11 | 7 | 0 | 800.2327 | 800.2333 | -0.0006 |
| 18 | 8 | 11 | 1 | 19 | 8 | 12 | 0 | 800.2596 | 800.2598 | -0.0002 |
| 18 | 7 | 11 | 1 | 19 | 7 | 12 | 0 | 800.2596 | 800.2598 | -0.0002 |
| 20 | 5 | 16 | 1 | 21 | 5 | 17 | 0 | 800.2822 | 800.2818 | 0.0004 |
| 20 | 4 | 16 | 1 | 21 | 4 | 17 | 0 | 800.2822 | 800.2818 | 0.0004 |
| 16 | 15 | 1 | 1 | 17 | 15 | 2 | 0 | 800.2822 | 800.2827 | -0.0005 |
| 22 | 2 | 21 | 1 | 23 | 2 | 22 | 0 | 800.3026 | 800.3030 | -0.0004 |
| 22 | 1 | 21 | 1 | 23 | 1 | 22 | 0 | 800.3026 | 800.3030 | -0.0004 |
| 15 | 11 | 4 | 1 | 16 | 11 | 5 | 0 | 800.3155 | 800.3141 | 0.0014 |
| 15 | 12 | 4 | 1 | 16 | 12 | 5 | 0 | 800.3392 | 800.3391 | 0.0001 |
| 14 | 12 | 2 | 1 | 15 | 12 | 3 | 0 | 800.3607 | 800.3635 | -0.0028 |
| 17 | 9 | 9 | 1 | 18 | 9 | 10 | 0 | 800.3661 | 800.3660 | 0.0001 |
| 17 | 8 | 9 | 1 | 18 | 8 | 10 | 0 | 800.3661 | 800.3660 | 0.0001 |
| 19 | 6 | 14 | 1 | 20 | 6 | 15 | 0 | 800.3898 | 800.3891 | 0.0007 |
| 19 | 5 | 14 | 1 | 20 | 5 | 15 | 0 | 800.3898 | 800.3891 | 0.0007 |
| 21 | 3 | 19 | 1 | 22 | 3 | 20 | 0 | 800.4113 | 800.4108 | 0.0005 |
| 21 | 2 | 19 | 1 | 22 | 2 | 20 | 0 | 800.4113 | 800.4108 | 0.0005 |
| 16 | 10 | 7 | 1 | 17 | 10 | 8 | 0 | 800.4705 | 800.4710 | -0.0005 |
| 16 | 9 | 7 | 1 | 17 | 9 | 8 | 0 | 800.4705 | 800.4710 | -0.0005 |
| 13 | 13 | 1 | 1 | 14 | 13 | 2 | 0 | 800.4802 | 800.4766 | 0.0036 |
| 18 | 7 | 12 | 1 | 19 | 7 | 13 | 0 | 800.4963 | 800.4959 | 0.0004 |
| 18 | 6 | 12 | 1 | 19 | 6 | 13 | 0 | 800.4963 | 800.4959 | 0.0004 |
| 20 | 4 | 17 | 1 | 21 | 4 | 18 | 0 | 800.5178 | 800.5183 | -0.0005 |
| 20 | 3 | 17 | 1 | 21 | 3 | 18 | 0 | 800.5178 | 800.5183 | -0.0005 |
| 22 | 0 | 22 | 1 | 23 | 0 | 23 | 0 | 800.5404 | 800.5401 | 0.0003 |
| 22 | 1 | 22 | 1 | 23 | 1 | 23 | 0 | 800.5404 | 800.5401 | 0.0003 |
| 15 | 11 | 5 | 1 | 16 | 11 | 6 | 0 | 800.5717 | 800.5711 | 0.0006 |
| 14 | 12 | 3 | 1 | 15 | 12 | 4 | 0 | 800.5717 | 800.5712 | 0.0005 |
| 15 | 10 | 5 | 1 | 16 | 10 | 6 | 0 | 800.5717 | 800.5733 | -0.0016 |
| 14 | 14 | 0 | 1 | 15 | 14 | 1 | 0 | 800.5867 | 800.5863 | 0.0004 |
| 17 | 8 | 10 | 1 | 18 | 8 | 11 | 0 | 800.6018 | 800.6022 | -0.0004 |
| 17 | 7 | 10 | 1 | 18 | 7 | 11 | 0 | 800.6018 | 800.6022 | -0.0004 |
| 14 | 13 | 2 | 1 | 15 | 13 | 3 | 0 | 800.6082 | 800.6100 | -0.0018 |
| 19 | 5 | 15 | 1 | 20 | 5 | 16 | 0 | 800.6255 | 800.6254 | 0.0001 |
| 19 | 4 | 15 | 1 | 20 | 4 | 16 | 0 | 800.6255 | 800.6254 | 0.0001 |
| 21 | 2 | 20 | 1 | 22 | 2 | 21 | 0 | 800.6481 | 800.6476 | 0.0005 |
| 21 | 1 | 20 | 1 | 22 | 1 | 21 | 0 | 800.6481 | 800.6476 | 0.0005 |
| 16 | 8 | 8 | 1 | 17 | 8 | 9 | 0 | 800.7072 | 800.7076 | -0.0004 |
| 16 | 9 | 8 | 1 | 17 | 9 | 9 | 0 | 800.7072 | 800.7076 | -0.0004 |
| 18 | 6 | 13 | 1 | 19 | 6 | 14 | 0 | 800.7320 | 800.7321 | -0.0001 |
| 18 | 5 | 13 | 1 | 19 | 5 | 14 | 0 | 800.7320 | 800.7321 | -0.0001 |
| 14 | 11 | 3 | 1 | 15 | 11 | 4 | 0 | 800.7430 | 800.7421 | 0.0009 |
| 20 | 3 | 18 | 1 | 21 | 3 | 19 | 0 | 800.7546 | 800.7549 | -0.0003 |
| 20 | 2 | 18 | 1 | 21 | 2 | 19 | 0 | 800.7546 | 800.7549 | -0.0003 |
| 15 | 9 | 6 | 1 | 16 | 9 | 7 | 0 | 800.8106 | 800.8113 | -0.0007 |
| 15 | 10 | 6 | 1 | 16 | 10 | 7 | 0 | 800.8106 | 800.8114 | -0.0008 |
| 17 | 7 | 11 | 1 | 18 | 7 | 12 | 0 | 800.8385 | 800.8383 | 0.0002 |
| 17 | 6 | 11 | 1 | 18 | 6 | 12 | 0 | 800.8385 | 800.8383 | 0.0002 |
| 19 | 4 | 16 | 1 | 20 | 4 | 17 | 0 | 800.8622 | 800.8618 | 0.0004 |
| 19 | 3 | 16 | 1 | 20 | 3 | 17 | 0 | 800.8622 | 800.8618 | 0.0004 |
| 21 | 1 | 21 | 1 | 22 | 1 | 22 | 0 | 800.8848 | 800.8847 | 0.0001 |
| 21 | 0 | 21 | 1 | 22 | 0 | 22 | 0 | 800.8848 | 800.8847 | 0.0001 |
| 14 | 10 | 4 | 1 | 15 | 10 | 5 | 0 | 800.8988 | 800.9000 | -0.0012 |
| 14 | 11 | 4 | 1 | 15 | 11 | 5 | 0 | 800.9149 | 800.9152 | -0.0003 |
| 13 | 11 | 2 | 1 | 14 | 11 | 3 | 0 | 800.9343 | 800.9323 | 0.0020 |
| 16 | 8 | 9 | 1 | 17 | 8 | 10 | 0 | 800.9440 | 800.9439 | 0.0001 |
| 16 | 7 | 9 | 1 | 17 | 7 | 10 | 0 | 800.9440 | 800.9439 | 0.0001 |
| 18 | 5 | 14 | 1 | 19 | 5 | 15 | 0 | 800.9688 | 800.9683 | 0.0005 |
| 18 | 4 | 14 | 1 | 19 | 4 | 15 | 0 | 800.9688 | 800.9683 | 0.0005 |
| 20 | 2 | 19 | 1 | 21 | 2 | 20 | 0 | 800.9914 | 800.9917 | -0.0003 |
| 20 | 1 | 19 | 1 | 21 | 1 | 20 | 0 | 800.9914 | 800.9917 | -0.0003 |
| 15 | 9 | 7 | 1 | 16 | 9 | 8 | 0 | 801.0484 | 801.0485 | -0.0001 |
| 15 | 8 | 7 | 1 | 16 | 8 | 8 | 0 | 801.0484 | 801.0485 | -0.0001 |
| 17 | 6 | 12 | 1 | 18 | 6 | 13 | 0 | 801.0742 | 801.0744 | -0.0002 |
| 17 | 5 | 12 | 1 | 18 | 5 | 13 | 0 | 801.0742 | 801.0744 | -0.0002 |
| 13 | 13 | 0 | 1 | 14 | 13 | 1 | 0 | 801.0979 | 801.0982 | -0.0003 |
| 19 | 3 | 17 | 1 | 20 | 3 | 18 | 0 | 801.0979 | 801.0984 | -0.0005 |
| 19 | 2 | 17 | 1 | 20 | 2 | 18 | 0 | 801.0979 | 801.0984 | -0.0005 |
| 14 | 10 | 5 | 1 | 15 | 10 | 6 | 0 | 801.1506 | 801.1498 | 0.0008 |
| 14 | 9 | 5 | 1 | 15 | 9 | 6 | 0 | 801.1506 | 801.1509 | -0.0003 |
| 13 | 12 | 2 | 1 | 14 | 12 | 3 | 0 | 801.1560 | 801.1534 | 0.0026 |
| 14 | 13 | 1 | 1 | 15 | 13 | 2 | 0 | 801.1560 | 801.1577 | -0.0017 |
| 13 | 11 | 3 | 1 | 14 | 11 | 4 | 0 | 801.1797 | 801.1795 | 0.0002 |
| 16 | 7 | 10 | 1 | 17 | 7 | 11 | 0 | 801.1797 | 801.1800 | -0.0003 |
| 16 | 6 | 10 | 1 | 17 | 6 | 11 | 0 | 801.1797 | 801.1800 | -0.0003 |
| 18 | 4 | 15 | 1 | 19 | 4 | 16 | 0 | 801.2044 | 801.2047 | -0.0003 |
| 18 | 3 | 15 | 1 | 19 | 3 | 16 | 0 | 801.2044 | 801.2047 | -0.0003 |
| 20 | 1 | 20 | 1 | 21 | 1 | 21 | 0 | 801.2281 | 801.2286 | -0.0005 |
| 20 | 0 | 20 | 1 | 21 | 0 | 21 | 0 | 801.2281 | 801.2286 | -0.0005 |
| 15 | 7 | 8 | 1 | 16 | 7 | 9 | 0 | 801.2851 | 801.2850 | 0.0001 |
| 15 | 8 | 8 | 1 | 16 | 8 | 9 | 0 | 801.2851 | 801.2850 | 0.0001 |
| 13 | 10 | 3 | 1 | 14 | 10 | 4 | 0 | 801.2959 | 801.2959 | 0.0000 |
| 17 | 5 | 13 | 1 | 18 | 5 | 14 | 0 | 801.3110 | 801.3107 | 0.0003 |
| 17 | 4 | 13 | 1 | 18 | 4 | 14 | 0 | 801.3110 | 801.3107 | 0.0003 |
| 19 | 2 | 18 | 1 | 20 | 2 | 19 | 0 | 801.3346 | 801.3351 | -0.0005 |
| 19 | 1 | 18 | 1 | 20 | 1 | 19 | 0 | 801.3346 | 801.3351 | -0.0005 |
| 14 | 8 | 6 | 1 | 15 | 8 | 7 | 0 | 801.3885 | 801.3885 | 0.0000 |
| 14 | 9 | 6 | 1 | 15 | 9 | 7 | 0 | 801.3885 | 801.3886 | -0.0001 |
| 16 | 6 | 11 | 1 | 17 | 6 | 12 | 0 | 801.4164 | 801.4162 | 0.0002 |
| 16 | 5 | 11 | 1 | 17 | 5 | 12 | 0 | 801.4164 | 801.4162 | 0.0002 |
| 18 | 3 | 16 | 1 | 19 | 3 | 17 | 0 | 801.4412 | 801.4412 | 0.0000 |
| 18 | 2 | 16 | 1 | 19 | 2 | 17 | 0 | 801.4412 | 801.4412 | 0.0000 |
| 13 | 9 | 4 | 1 | 14 | 9 | 5 | 0 | 801.4810 | 801.4824 | -0.0014 |
| 13 | 10 | 4 | 1 | 14 | 10 | 5 | 0 | 801.4907 | 801.4912 | -0.0005 |
| 12 | 10 | 2 | 1 | 13 | 10 | 3 | 0 | 801.5111 | 801.5082 | 0.0029 |
| 15 | 7 | 9 | 1 | 16 | 7 | 10 | 0 | 801.5208 | 801.5212 | -0.0004 |
| 15 | 6 | 9 | 1 | 16 | 6 | 10 | 0 | 801.5208 | 801.5212 | -0.0004 |
| 17 | 4 | 14 | 1 | 18 | 4 | 15 | 0 | 801.5466 | 801.5470 | -0.0004 |
| 17 | 3 | 14 | 1 | 18 | 3 | 15 | 0 | 801.5466 | 801.5470 | -0.0004 |
| 19 | 1 | 19 | 1 | 20 | 1 | 20 | 0 | 801.5714 | 801.5719 | -0.0005 |
| 19 | 0 | 19 | 1 | 20 | 0 | 20 | 0 | 801.5714 | 801.5719 | -0.0005 |
| 13 | 12 | 1 | 1 | 14 | 12 | 2 | 0 | 801.5983 | 801.5999 | -0.0016 |
| 12 | 12 | 0 | 1 | 13 | 12 | 1 | 0 | 801.6058 | 801.6083 | -0.0025 |
| 14 | 8 | 7 | 1 | 15 | 8 | 8 | 0 | 801.6252 | 801.6253 | -0.0001 |
| 14 | 7 | 7 | 1 | 15 | 7 | 8 | 0 | 801.6252 | 801.6253 | -0.0001 |
| 16 | 5 | 12 | 1 | 17 | 5 | 13 | 0 | 801.6521 | 801.6523 | -0.0002 |
| 16 | 4 | 12 | 1 | 17 | 4 | 13 | 0 | 801.6521 | 801.6523 | -0.0002 |
| 18 | 2 | 17 | 1 | 19 | 2 | 18 | 0 | 801.6779 | 801.6778 | 0.0001 |
| 18 | 1 | 17 | 1 | 19 | 1 | 18 | 0 | 801.6779 | 801.6778 | 0.0001 |
| 12 | 11 | 2 | 1 | 13 | 11 | 3 | 0 | 801.6995 | 801.7002 | -0.0007 |
| 13 | 9 | 5 | 1 | 14 | 9 | 6 | 0 | 801.7274 | 801.7272 | 0.0002 |
| 13 | 8 | 5 | 1 | 14 | 8 | 6 | 0 | 801.7274 | 801.7277 | -0.0003 |
| 15 | 6 | 10 | 1 | 16 | 6 | 11 | 0 | 801.7576 | 801.7573 | 0.0003 |
| 15 | 5 | 10 | 1 | 16 | 5 | 11 | 0 | 801.7576 | 801.7573 | 0.0003 |
| 12 | 10 | 3 | 1 | 13 | 10 | 4 | 0 | 801.7780 | 801.7802 | -0.0022 |
| 17 | 3 | 15 | 1 | 18 | 3 | 16 | 0 | 801.7834 | 801.7834 | 0.0000 |
| 17 | 2 | 15 | 1 | 18 | 2 | 16 | 0 | 801.7834 | 801.7834 | 0.0000 |
| 12 | 9 | 3 | 1 | 13 | 9 | 4 | 0 | 801.8544 | 801.8560 | -0.0016 |
| 14 | 6 | 8 | 1 | 15 | 6 | 9 | 0 | 801.8620 | 801.8616 | 0.0004 |
| 14 | 7 | 8 | 1 | 15 | 7 | 9 | 0 | 801.8620 | 801.8616 | 0.0004 |
| 16 | 4 | 13 | 1 | 17 | 4 | 14 | 0 | 801.8889 | 801.8886 | 0.0003 |
| 16 | 3 | 13 | 1 | 17 | 3 | 14 | 0 | 801.8889 | 801.8886 | 0.0003 |
| 18 | 1 | 18 | 1 | 19 | 1 | 19 | 0 | 801.9147 | 801.9146 | 0.0001 |
| 18 | 0 | 18 | 1 | 19 | 0 | 19 | 0 | 801.9147 | 801.9146 | 0.0001 |
| 13 | 7 | 6 | 1 | 14 | 7 | 7 | 0 | 801.9642 | 801.9649 | -0.0007 |
| 13 | 8 | 6 | 1 | 14 | 8 | 7 | 0 | 801.9642 | 801.9649 | -0.0007 |
| 15 | 5 | 11 | 1 | 16 | 5 | 12 | 0 | 801.9933 | 801.9934 | -0.0001 |
| 15 | 4 | 11 | 1 | 16 | 4 | 12 | 0 | 801.9933 | 801.9934 | -0.0001 |
| 17 | 2 | 16 | 1 | 18 | 2 | 17 | 0 | 802.0202 | 802.0200 | 0.0002 |
| 17 | 1 | 16 | 1 | 18 | 1 | 17 | 0 | 802.0202 | 802.0200 | 0.0002 |
| 12 | 11 | 1 | 1 | 13 | 11 | 2 | 0 | 802.0449 | 802.0480 | -0.0031 |
| 12 | 8 | 4 | 1 | 13 | 8 | 5 | 0 | 802.0610 | 802.0620 | -0.0010 |
| 12 | 9 | 4 | 1 | 13 | 9 | 5 | 0 | 802.0675 | 802.0668 | 0.0007 |
| 11 | 9 | 2 | 1 | 12 | 9 | 3 | 0 | 802.0923 | 802.0898 | 0.0025 |
| 14 | 6 | 9 | 1 | 15 | 6 | 10 | 0 | 802.0976 | 802.0977 | -0.0001 |
| 14 | 5 | 9 | 1 | 15 | 5 | 10 | 0 | 802.0976 | 802.0977 | -0.0001 |
| 16 | 3 | 14 | 1 | 17 | 3 | 15 | 0 | 802.1245 | 802.1250 | -0.0005 |
| 16 | 2 | 14 | 1 | 17 | 2 | 15 | 0 | 802.1245 | 802.1250 | -0.0005 |
| 13 | 7 | 7 | 1 | 14 | 7 | 8 | 0 | 802.2009 | 802.2014 | -0.0005 |
| 13 | 6 | 7 | 1 | 14 | 6 | 8 | 0 | 802.2009 | 802.2014 | -0.0005 |
| 15 | 4 | 12 | 1 | 16 | 4 | 13 | 0 | 802.2300 | 802.2296 | 0.0004 |
| 15 | 3 | 12 | 1 | 16 | 3 | 13 | 0 | 802.2300 | 802.2296 | 0.0004 |
| 11 | 10 | 2 | 1 | 12 | 10 | 3 | 0 | 802.2515 | 802.2502 | 0.0013 |
| 17 | 1 | 17 | 1 | 18 | 1 | 18 | 0 | 802.2569 | 802.2567 | 0.0002 |
| 17 | 0 | 17 | 1 | 18 | 0 | 18 | 0 | 802.2569 | 802.2567 | 0.0002 |
| 10 | 10 | 1 | 1 | 11 | 10 | 2 | 0 | 802.2950 | 802.2942 | 0.0008 |
| 12 | 8 | 5 | 1 | 13 | 8 | 6 | 0 | 802.3032 | 802.3034 | -0.0002 |
| 12 | 7 | 5 | 1 | 13 | 7 | 6 | 0 | 802.3032 | 802.3036 | -0.0004 |
| 14 | 5 | 10 | 1 | 15 | 5 | 11 | 0 | 802.3344 | 802.3338 | 0.0006 |
| 14 | 4 | 10 | 1 | 15 | 4 | 11 | 0 | 802.3344 | 802.3338 | 0.0006 |
| 16 | 2 | 15 | 1 | 17 | 2 | 16 | 0 | 802.3613 | 802.3615 | -0.0002 |
| 16 | 1 | 15 | 1 | 17 | 1 | 16 | 0 | 802.3613 | 802.3615 | -0.0002 |
| 11 | 9 | 3 | 1 | 12 | 9 | 4 | 0 | 802.3774 | 802.3738 | 0.0036 |
| 11 | 8 | 3 | 1 | 12 | 8 | 4 | 0 | 802.4194 | 802.4207 | -0.0013 |
| 13 | 6 | 8 | 1 | 14 | 6 | 9 | 0 | 802.4377 | 802.4375 | 0.0002 |
| 13 | 5 | 8 | 1 | 14 | 5 | 9 | 0 | 802.4377 | 802.4375 | 0.0002 |
| 15 | 2 | 13 | 1 | 16 | 2 | 14 | 0 | 802.4657 | 802.4659 | -0.0002 |
| 15 | 3 | 13 | 1 | 16 | 3 | 14 | 0 | 802.4657 | 802.4659 | -0.0002 |
| 11 | 10 | 1 | 1 | 12 | 10 | 2 | 0 | 802.5040 | 802.5035 | 0.0005 |
| 12 | 6 | 6 | 1 | 13 | 6 | 7 | 0 | 802.5399 | 802.5404 | -0.0005 |
| 12 | 7 | 6 | 1 | 13 | 7 | 7 | 0 | 802.5399 | 802.5404 | -0.0005 |
| 14 | 4 | 11 | 1 | 15 | 4 | 12 | 0 | 802.5701 | 802.5700 | 0.0001 |
| 14 | 3 | 11 | 1 | 15 | 3 | 12 | 0 | 802.5701 | 802.5700 | 0.0001 |
| 16 | 1 | 16 | 1 | 17 | 1 | 17 | 0 | 802.5980 | 802.5981 | -0.0001 |
| 16 | 0 | 16 | 1 | 17 | 0 | 17 | 0 | 802.5980 | 802.5981 | -0.0001 |
| 10 | 10 | 0 | 1 | 11 | 10 | 1 | 0 | 802.6293 | 802.6265 | 0.0028 |
| 10 | 10 | 0 | 1 | 11 | 10 | 1 | 0 | 802.6293 | 802.6265 | 0.0028 |
| 11 | 7 | 4 | 1 | 12 | 7 | 5 | 0 | 802.6389 | 802.6394 | -0.0005 |
| 11 | 8 | 4 | 1 | 12 | 8 | 5 | 0 | 802.6389 | 802.6419 | -0.0030 |
| 13 | 5 | 9 | 1 | 14 | 5 | 10 | 0 | 802.6734 | 802.6736 | -0.0002 |
| 13 | 4 | 9 | 1 | 14 | 4 | 10 | 0 | 802.6734 | 802.6736 | -0.0002 |
| 15 | 2 | 14 | 1 | 16 | 2 | 15 | 0 | 802.7024 | 802.7024 | 0.0000 |
| 15 | 1 | 14 | 1 | 16 | 1 | 15 | 0 | 802.7024 | 802.7024 | 0.0000 |
| 12 | 6 | 7 | 1 | 13 | 6 | 8 | 0 | 802.7767 | 802.7766 | 0.0001 |
| 12 | 5 | 7 | 1 | 13 | 5 | 8 | 0 | 802.7767 | 802.7767 | 0.0001 |
| 10 | 9 | 2 | 1 | 11 | 9 | 3 | 0 | 802.8057 | 802.8035 | 0.0022 |
| 14 | 3 | 12 | 1 | 15 | 3 | 13 | 0 | 802.8057 | 802.8063 | -0.0006 |
| 14 | 2 | 12 | 1 | 15 | 2 | 13 | 0 | 802.8057 | 802.8063 | -0.0006 |
| 11 | 7 | 5 | 1 | 12 | 7 | 6 | 0 | 802.8779 | 802.8785 | -0.0006 |
| 11 | 6 | 5 | 1 | 12 | 6 | 6 | 0 | 802.8779 | 802.8786 | -0.0007 |
| 9 | 9 | 1 | 1 | 10 | 9 | 2 | 0 | 802.9004 | 802.9012 | -0.0008 |
| 13 | 4 | 10 | 1 | 14 | 4 | 11 | 0 | 802.9101 | 802.9097 | 0.0004 |
| 13 | 3 | 10 | 1 | 14 | 3 | 11 | 0 | 802.9101 | 802.9097 | 0.0004 |
| 15 | 1 | 15 | 1 | 16 | 1 | 16 | 0 | 802.9381 | 802.9390 | -0.0009 |
| 15 | 0 | 15 | 1 | 16 | 0 | 16 | 0 | 802.9381 | 802.9390 | -0.0009 |
| 10 | 8 | 3 | 1 | 11 | 8 | 4 | 0 | 802.9629 | 802.9611 | 0.0018 |
| 10 | 9 | 1 | 1 | 11 | 9 | 2 | 0 | 802.9700 | 802.9683 | 0.0017 |
| 10 | 7 | 3 | 1 | 11 | 7 | 4 | 0 | 802.9887 | 802.9884 | 0.0003 |
| 12 | 5 | 8 | 1 | 13 | 5 | 9 | 0 | 803.0124 | 803.0127 | -0.0003 |
| 12 | 4 | 8 | 1 | 13 | 4 | 9 | 0 | 803.0124 | 803.0127 | -0.0003 |
| 14 | 2 | 13 | 1 | 15 | 2 | 14 | 0 | 803.0425 | 803.0426 | -0.0001 |
| 14 | 1 | 13 | 1 | 15 | 1 | 14 | 0 | 803.0425 | 803.0426 | -0.0001 |
| 11 | 5 | 6 | 1 | 12 | 5 | 7 | 0 | 803.1146 | 803.1151 | -0.0005 |
| 11 | 6 | 6 | 1 | 12 | 6 | 7 | 0 | 803.1146 | 803.1151 | -0.0005 |
| 13 | 3 | 11 | 1 | 14 | 3 | 12 | 0 | 803.1458 | 803.1459 | -0.0001 |
| 13 | 2 | 11 | 1 | 14 | 2 | 12 | 0 | 803.1458 | 803.1459 | -0.0001 |
| 10 | 6 | 4 | 1 | 11 | 6 | 5 | 0 | 803.2158 | 803.2151 | 0.0007 |
| 10 | 7 | 4 | 1 | 11 | 7 | 5 | 0 | 803.2158 | 803.2162 | -0.0004 |
| 12 | 4 | 9 | 1 | 13 | 4 | 10 | 0 | 803.2491 | 803.2488 | 0.0003 |
| 12 | 3 | 9 | 1 | 13 | 3 | 10 | 0 | 803.2491 | 803.2488 | 0.0003 |
| 9 | 7 | 2 | 1 | 10 | 7 | 3 | 0 | 803.2610 | 803.2630 | -0.0020 |
| 14 | 1 | 14 | 1 | 15 | 1 | 15 | 0 | 803.2793 | 803.2791 | 0.0002 |
| 14 | 0 | 14 | 1 | 15 | 0 | 15 | 0 | 803.2793 | 803.2791 | 0.0002 |
| 11 | 5 | 7 | 1 | 12 | 5 | 8 | 0 | 803.3514 | 803.3512 | 0.0002 |
| 11 | 4 | 7 | 1 | 12 | 4 | 8 | 0 | 803.3514 | 803.3512 | 0.0002 |
| 9 | 8 | 2 | 1 | 10 | 8 | 3 | 0 | 803.3600 | 803.3599 | 0.0001 |
| 13 | 2 | 12 | 1 | 14 | 2 | 13 | 0 | 803.3826 | 803.3822 | 0.0004 |
| 13 | 1 | 12 | 1 | 14 | 1 | 13 | 0 | 803.3826 | 803.3822 | 0.0004 |
| 9 | 8 | 1 | 1 | 10 | 8 | 2 | 0 | 803.4450 | 803.4434 | 0.0016 |
| 10 | 6 | 5 | 1 | 11 | 6 | 6 | 0 | 803.4525 | 803.4528 | -0.0003 |
| 10 | 5 | 5 | 1 | 11 | 5 | 6 | 0 | 803.4525 | 803.4528 | -0.0003 |
| 12 | 3 | 10 | 1 | 13 | 3 | 11 | 0 | 803.4848 | 803.4850 | -0.0002 |
| 12 | 2 | 10 | 1 | 13 | 2 | 11 | 0 | 803.4848 | 803.4850 | -0.0002 |
| 9 | 7 | 3 | 1 | 10 | 7 | 4 | 0 | 803.5440 | 803.5431 | 0.0009 |
| 9 | 6 | 3 | 1 | 10 | 6 | 4 | 0 | 803.5580 | 803.5580 | 0.0000 |
| 11 | 4 | 8 | 1 | 12 | 4 | 9 | 0 | 803.5870 | 803.5873 | -0.0003 |
| 11 | 3 | 8 | 1 | 12 | 3 | 9 | 0 | 803.5870 | 803.5873 | -0.0003 |
| 13 | 1 | 13 | 1 | 14 | 1 | 14 | 0 | 803.6182 | 803.6187 | -0.0005 |
| 13 | 0 | 13 | 1 | 14 | 0 | 14 | 0 | 803.6182 | 803.6187 | -0.0005 |
| 10 | 4 | 6 | 1 | 11 | 4 | 7 | 0 | 803.6893 | 803.6890 | 0.0003 |
| 10 | 5 | 6 | 1 | 11 | 5 | 7 | 0 | 803.6893 | 803.6890 | 0.0003 |
| 12 | 2 | 11 | 1 | 13 | 2 | 12 | 0 | 803.7216 | 803.7212 | 0.0004 |
| 12 | 1 | 11 | 1 | 13 | 1 | 12 | 0 | 803.7216 | 803.7212 | 0.0004 |
| 9 | 5 | 4 | 1 | 10 | 5 | 5 | 0 | 803.7894 | 803.7893 | 0.0001 |
| 9 | 6 | 4 | 1 | 10 | 6 | 5 | 0 | 803.7894 | 803.7898 | -0.0004 |
| 11 | 3 | 9 | 1 | 12 | 3 | 10 | 0 | 803.8238 | 803.8234 | 0.0004 |
| 11 | 2 | 9 | 1 | 12 | 2 | 10 | 0 | 803.8238 | 803.8234 | 0.0004 |
| 8 | 6 | 2 | 1 | 9 | 6 | 3 | 0 | 803.8485 | 803.8504 | -0.0019 |
| 8 | 7 | 2 | 1 | 9 | 7 | 3 | 0 | 803.9196 | 803.9192 | 0.0004 |
| 10 | 4 | 7 | 1 | 11 | 4 | 8 | 0 | 803.9249 | 803.9251 | -0.0002 |
| 10 | 3 | 7 | 1 | 11 | 3 | 8 | 0 | 803.9249 | 803.9251 | -0.0002 |
| 8 | 7 | 1 | 1 | 9 | 7 | 2 | 0 | 803.9325 | 803.9300 | 0.0025 |
| 12 | 1 | 12 | 1 | 13 | 1 | 13 | 0 | 803.9572 | 803.9576 | -0.0004 |
| 12 | 0 | 12 | 1 | 13 | 0 | 13 | 0 | 803.9572 | 803.9576 | -0.0004 |
| 9 | 5 | 5 | 1 | 10 | 5 | 6 | 0 | 804.0261 | 804.0261 | 0.0000 |
| 9 | 4 | 5 | 1 | 10 | 4 | 6 | 0 | 804.0261 | 804.0261 | 0.0000 |
| 11 | 2 | 10 | 1 | 12 | 2 | 11 | 0 | 804.0595 | 804.0595 | 0.0000 |
| 11 | 1 | 10 | 1 | 12 | 1 | 11 | 0 | 804.0595 | 804.0595 | 0.0000 |
| 8 | 5 | 3 | 1 | 9 | 5 | 4 | 0 | 804.1283 | 804.1286 | -0.0003 |
| 10 | 3 | 8 | 1 | 11 | 3 | 9 | 0 | 804.1606 | 804.1611 | -0.0005 |
| 10 | 2 | 8 | 1 | 11 | 2 | 9 | 0 | 804.1606 | 804.1611 | -0.0005 |
| 9 | 3 | 6 | 1 | 10 | 3 | 7 | 0 | 804.2629 | 804.2622 | 0.0007 |
| 9 | 4 | 6 | 1 | 10 | 4 | 7 | 0 | 804.2629 | 804.2622 | 0.0007 |
| 11 | 1 | 11 | 1 | 12 | 1 | 12 | 0 | 804.2951 | 804.2958 | -0.0007 |
| 11 | 0 | 11 | 1 | 12 | 0 | 12 | 0 | 804.2951 | 804.2958 | -0.0007 |
| 8 | 4 | 4 | 1 | 9 | 4 | 5 | 0 | 804.3619 | 804.3624 | -0.0005 |
| 8 | 5 | 4 | 1 | 9 | 5 | 5 | 0 | 804.3619 | 804.3626 | -0.0007 |
| 10 | 2 | 9 | 1 | 11 | 2 | 10 | 0 | 804.3963 | 804.3972 | -0.0009 |
| 10 | 1 | 9 | 1 | 11 | 1 | 10 | 0 | 804.3963 | 804.3972 | -0.0009 |
| 7 | 6 | 1 | 1 | 8 | 6 | 2 | 0 | 804.4307 | 804.4286 | 0.0021 |
| 7 | 5 | 2 | 1 | 8 | 5 | 3 | 0 | 804.4350 | 804.4358 | -0.0008 |
| 7 | 6 | 2 | 1 | 8 | 6 | 3 | 0 | 804.4802 | 804.4809 | -0.0007 |
| 9 | 3 | 7 | 1 | 10 | 3 | 8 | 0 | 804.4985 | 804.4982 | 0.0003 |
| 9 | 2 | 7 | 1 | 10 | 2 | 8 | 0 | 804.4985 | 804.4982 | 0.0003 |
| 8 | 4 | 5 | 1 | 9 | 4 | 6 | 0 | 804.5986 | 804.5987 | -0.0001 |
| 8 | 3 | 5 | 1 | 9 | 3 | 6 | 0 | 804.5986 | 804.5987 | -0.0001 |
| 10 | 1 | 10 | 1 | 11 | 1 | 11 | 0 | 804.6331 | 804.6335 | -0.0004 |
| 10 | 0 | 10 | 1 | 11 | 0 | 11 | 0 | 804.6331 | 804.6335 | -0.0004 |
| 7 | 5 | 3 | 1 | 8 | 5 | 4 | 0 | 804.6955 | 804.6960 | -0.0005 |
| 6 | 6 | 0 | 1 | 7 | 6 | 1 | 0 | 804.6987 | 804.6977 | 0.0010 |
| 7 | 4 | 3 | 1 | 8 | 4 | 4 | 0 | 804.6987 | 804.6994 | -0.0007 |
| 9 | 2 | 8 | 1 | 10 | 2 | 9 | 0 | 804.7342 | 804.7343 | -0.0001 |
| 9 | 1 | 8 | 1 | 10 | 1 | 9 | 0 | 804.7342 | 804.7343 | -0.0001 |
| 8 | 2 | 6 | 1 | 9 | 2 | 7 | 0 | 804.8354 | 804.8347 | 0.0007 |
| 8 | 3 | 6 | 1 | 9 | 3 | 7 | 0 | 804.8354 | 804.8347 | 0.0007 |
| 7 | 3 | 4 | 1 | 8 | 3 | 5 | 0 | 804.9344 | 804.9344 | 0.0000 |
| 7 | 4 | 4 | 1 | 8 | 4 | 5 | 0 | 804.9344 | 804.9345 | -0.0001 |
| 6 | 5 | 1 | 1 | 7 | 5 | 2 | 0 | 804.9419 | 804.9395 | 0.0024 |
| 9 | 1 | 9 | 1 | 10 | 1 | 10 | 0 | 804.9710 | 804.9704 | 0.0006 |
| 9 | 0 | 9 | 1 | 10 | 0 | 10 | 0 | 804.9710 | 804.9704 | 0.0006 |
| 6 | 4 | 2 | 1 | 7 | 4 | 3 | 0 | 805.0205 | 805.0178 | 0.0027 |
| 6 | 5 | 2 | 1 | 7 | 5 | 3 | 0 | 805.0441 | 805.0447 | -0.0006 |
| 8 | 2 | 7 | 1 | 9 | 2 | 8 | 0 | 805.0700 | 805.0707 | -0.0007 |
| 8 | 1 | 7 | 1 | 9 | 1 | 8 | 0 | 805.0700 | 805.0707 | -0.0007 |
| 7 | 3 | 5 | 1 | 8 | 3 | 6 | 0 | 805.1701 | 805.1705 | -0.0004 |
| 7 | 2 | 5 | 1 | 8 | 2 | 6 | 0 | 805.1701 | 805.1705 | -0.0004 |
| 5 | 5 | 0 | 1 | 6 | 5 | 1 | 0 | 805.2303 | 805.2305 | -0.0002 |
| 6 | 4 | 3 | 1 | 7 | 4 | 4 | 0 | 805.2701 | 805.2687 | 0.0014 |
| 6 | 3 | 3 | 1 | 7 | 3 | 4 | 0 | 805.2701 | 805.2701 | 0.0000 |
| 5 | 5 | 1 | 1 | 6 | 5 | 2 | 0 | 805.3067 | 805.3046 | 0.0021 |
| 8 | 1 | 8 | 1 | 9 | 1 | 9 | 0 | 805.3067 | 805.3068 | -0.0001 |
| 8 | 0 | 8 | 1 | 9 | 0 | 9 | 0 | 805.3067 | 805.3068 | -0.0001 |
| 7 | 2 | 6 | 1 | 8 | 2 | 7 | 0 | 805.4068 | 805.4065 | 0.0003 |
| 7 | 1 | 6 | 1 | 8 | 1 | 7 | 0 | 805.4068 | 805.4065 | 0.0003 |
| 5 | 4 | 1 | 1 | 6 | 4 | 2 | 0 | 805.4638 | 805.4622 | 0.0016 |
| 25 | 14 | 12 | 1 | 25 | 14 | 11 | 0 | 805.4972 | 805.4973 | -0.0001 |
| 6 | 2 | 4 | 1 | 7 | 2 | 5 | 0 | 805.5058 | 805.5056 | 0.0002 |
| 6 | 3 | 4 | 1 | 7 | 3 | 5 | 0 | 805.5058 | 805.5057 | 0.0001 |
| 24 | 13 | 12 | 1 | 24 | 13 | 11 | 0 | 805.5134 | 805.5133 | 0.0001 |
| 37 | 27 | 11 | 1 | 37 | 27 | 10 | 0 | 805.5166 | 805.5158 | 0.0008 |
| 23 | 12 | 12 | 1 | 23 | 12 | 11 | 0 | 805.5284 | 805.5289 | -0.0005 |
| 22 | 11 | 12 | 1 | 22 | 11 | 11 | 0 | 805.5446 | 805.5439 | 0.0007 |
| 21 | 10 | 12 | 1 | 21 | 10 | 11 | 0 | 805.5586 | 805.5584 | 0.0002 |
| 20 | 9 | 12 | 1 | 20 | 9 | 11 | 0 | 805.5725 | 805.5723 | 0.0002 |
| 19 | 8 | 12 | 1 | 19 | 8 | 11 | 0 | 805.5855 | 805.5856 | -0.0001 |
| 18 | 7 | 12 | 1 | 18 | 7 | 11 | 0 | 805.5984 | 805.5984 | 0.0000 |
| 5 | 4 | 2 | 1 | 6 | 4 | 3 | 0 | 805.6102 | 805.6101 | 0.0001 |
| 17 | 6 | 12 | 1 | 17 | 6 | 11 | 0 | 805.6102 | 805.6106 | -0.0004 |
| 16 | 5 | 12 | 1 | 16 | 5 | 11 | 0 | 805.6220 | 805.6222 | -0.0002 |
| 15 | 4 | 12 | 1 | 15 | 4 | 11 | 0 | 805.6339 | 805.6332 | 0.0007 |
| 7 | 1 | 7 | 1 | 8 | 1 | 8 | 0 | 805.6425 | 805.6425 | 0.0000 |
| 7 | 0 | 7 | 1 | 8 | 0 | 8 | 0 | 805.6425 | 805.6425 | 0.0000 |
| 14 | 3 | 12 | 1 | 14 | 3 | 11 | 0 | 805.6425 | 805.6435 | -0.0010 |
| 30 | 20 | 11 | 1 | 30 | 20 | 10 | 0 | 805.6522 | 805.6507 | 0.0015 |
| 13 | 2 | 12 | 1 | 13 | 2 | 11 | 0 | 805.6522 | 805.6532 | -0.0010 |
| 12 | 1 | 12 | 1 | 12 | 1 | 11 | 0 | 805.6619 | 805.6623 | -0.0004 |
| 29 | 19 | 11 | 1 | 29 | 19 | 10 | 0 | 805.6683 | 805.6684 | -0.0001 |
| 28 | 18 | 11 | 1 | 28 | 18 | 10 | 0 | 805.6855 | 805.6858 | -0.0003 |
| 27 | 17 | 11 | 1 | 27 | 17 | 10 | 0 | 805.7028 | 805.7027 | 0.0001 |
| 26 | 16 | 11 | 1 | 26 | 16 | 10 | 0 | 805.7189 | 805.7192 | -0.0003 |
| 25 | 15 | 11 | 1 | 25 | 15 | 10 | 0 | 805.7350 | 805.7353 | -0.0003 |
| 6 | 2 | 5 | 1 | 7 | 2 | 6 | 0 | 805.7415 | 805.7416 | -0.0001 |
| 6 | 1 | 5 | 1 | 7 | 1 | 6 | 0 | 805.7415 | 805.7416 | -0.0001 |
| 24 | 14 | 11 | 1 | 24 | 14 | 10 | 0 | 805.7512 | 805.7509 | 0.0003 |
| 23 | 13 | 11 | 1 | 23 | 13 | 10 | 0 | 805.7662 | 805.7660 | 0.0002 |
| 4 | 4 | 0 | 1 | 5 | 4 | 1 | 0 | 805.7695 | 805.7699 | -0.0004 |
| 22 | 12 | 11 | 1 | 22 | 12 | 10 | 0 | 805.7813 | 805.7807 | 0.0006 |
| 21 | 11 | 11 | 1 | 21 | 11 | 10 | 0 | 805.7953 | 805.7948 | 0.0005 |
| 20 | 10 | 11 | 1 | 20 | 10 | 10 | 0 | 805.8082 | 805.8085 | -0.0003 |
| 19 | 9 | 11 | 1 | 19 | 9 | 10 | 0 | 805.8211 | 805.8216 | -0.0005 |
| 18 | 8 | 11 | 1 | 18 | 8 | 10 | 0 | 805.8340 | 805.8341 | -0.0001 |
| 5 | 3 | 3 | 1 | 6 | 3 | 4 | 0 | 805.8394 | 805.8398 | -0.0004 |
| 5 | 2 | 3 | 1 | 6 | 2 | 4 | 0 | 805.8394 | 805.8403 | -0.0009 |
| 17 | 7 | 11 | 1 | 17 | 7 | 10 | 0 | 805.8470 | 805.8462 | 0.0008 |
| 16 | 6 | 11 | 1 | 16 | 6 | 10 | 0 | 805.8577 | 805.8576 | 0.0001 |
| 15 | 5 | 11 | 1 | 15 | 5 | 10 | 0 | 805.8685 | 805.8684 | 0.0001 |
| 14 | 4 | 11 | 1 | 14 | 4 | 10 | 0 | 805.8803 | 805.8787 | 0.0016 |
| 13 | 3 | 11 | 1 | 13 | 3 | 10 | 0 | 805.8889 | 805.8883 | 0.0006 |
| 4 | 4 | 1 | 1 | 5 | 4 | 2 | 0 | 805.8965 | 805.8954 | 0.0011 |
| 30 | 21 | 10 | 1 | 30 | 21 | 9 | 0 | 805.8965 | 805.8957 | 0.0008 |
| 11 | 1 | 11 | 1 | 11 | 1 | 10 | 0 | 805.9061 | 805.9057 | 0.0004 |
| 29 | 20 | 10 | 1 | 29 | 20 | 9 | 0 | 805.9126 | 805.9121 | 0.0005 |
| 28 | 19 | 10 | 1 | 28 | 19 | 9 | 0 | 805.9287 | 805.9283 | 0.0004 |
| 27 | 18 | 10 | 1 | 27 | 18 | 9 | 0 | 805.9449 | 805.9442 | 0.0007 |
| 26 | 17 | 10 | 1 | 26 | 17 | 9 | 0 | 805.9600 | 805.9598 | 0.0002 |
| 25 | 16 | 10 | 1 | 25 | 16 | 9 | 0 | 805.9750 | 805.9751 | -0.0001 |
| 6 | 1 | 6 | 1 | 7 | 1 | 7 | 0 | 805.9772 | 805.9775 | -0.0003 |
| 6 | 0 | 6 | 1 | 7 | 0 | 7 | 0 | 805.9772 | 805.9775 | -0.0003 |
| 24 | 15 | 10 | 1 | 24 | 15 | 9 | 0 | 805.9901 | 805.9899 | 0.0002 |
| 4 | 3 | 1 | 1 | 5 | 3 | 2 | 0 | 805.9998 | 805.9960 | 0.0038 |
| 23 | 14 | 10 | 1 | 23 | 14 | 9 | 0 | 806.0041 | 806.0044 | -0.0003 |
| 22 | 13 | 10 | 1 | 22 | 13 | 9 | 0 | 806.0181 | 806.0185 | -0.0004 |
| 21 | 12 | 10 | 1 | 21 | 12 | 9 | 0 | 806.0321 | 806.0322 | -0.0001 |
| 20 | 11 | 10 | 1 | 20 | 11 | 9 | 0 | 806.0450 | 806.0454 | -0.0004 |
| 19 | 10 | 10 | 1 | 19 | 10 | 9 | 0 | 806.0579 | 806.0581 | -0.0002 |
| 18 | 9 | 10 | 1 | 18 | 9 | 9 | 0 | 806.0708 | 806.0704 | 0.0004 |
| 5 | 1 | 4 | 1 | 6 | 1 | 5 | 0 | 806.0762 | 806.0760 | 0.0002 |
| 5 | 2 | 4 | 1 | 6 | 2 | 5 | 0 | 806.0762 | 806.0760 | 0.0002 |
| 17 | 8 | 10 | 1 | 17 | 8 | 9 | 0 | 806.0826 | 806.0821 | 0.0005 |
| 16 | 7 | 10 | 1 | 16 | 7 | 9 | 0 | 806.0934 | 806.0933 | 0.0001 |
| 15 | 6 | 10 | 1 | 15 | 6 | 9 | 0 | 806.1042 | 806.1040 | 0.0002 |
| 14 | 5 | 10 | 1 | 14 | 5 | 9 | 0 | 806.1138 | 806.1141 | -0.0003 |
| 32 | 24 | 9 | 1 | 32 | 24 | 8 | 0 | 806.1235 | 806.1222 | 0.0013 |
| 13 | 4 | 10 | 1 | 13 | 4 | 9 | 0 | 806.1235 | 806.1236 | -0.0001 |
| 12 | 3 | 10 | 1 | 12 | 3 | 9 | 0 | 806.1332 | 806.1325 | 0.0007 |
| 31 | 23 | 9 | 1 | 31 | 23 | 8 | 0 | 806.1332 | 806.1351 | -0.0019 |
| 11 | 2 | 10 | 1 | 11 | 2 | 9 | 0 | 806.1408 | 806.1408 | 0.0000 |
| 10 | 1 | 10 | 1 | 10 | 1 | 9 | 0 | 806.1483 | 806.1485 | -0.0002 |
| 30 | 22 | 9 | 1 | 30 | 22 | 8 | 0 | 806.1483 | 806.1485 | -0.0002 |
| 29 | 21 | 9 | 1 | 29 | 21 | 8 | 0 | 806.1623 | 806.1623 | 0.0000 |
| 4 | 2 | 2 | 1 | 5 | 2 | 3 | 0 | 806.1698 | 806.1704 | -0.0006 |
| 28 | 20 | 9 | 1 | 28 | 20 | 8 | 0 | 806.1763 | 806.1762 | 0.0001 |
| 27 | 19 | 9 | 1 | 27 | 19 | 8 | 0 | 806.1903 | 806.1902 | 0.0001 |
| 26 | 18 | 9 | 1 | 26 | 18 | 8 | 0 | 806.2042 | 806.2041 | 0.0001 |
| 25 | 17 | 9 | 1 | 25 | 17 | 8 | 0 | 806.2182 | 806.2180 | 0.0002 |
| 24 | 16 | 9 | 1 | 24 | 16 | 8 | 0 | 806.2311 | 806.2316 | -0.0005 |
| 23 | 15 | 9 | 1 | 23 | 15 | 8 | 0 | 806.2451 | 806.2450 | 0.0001 |
| 22 | 14 | 9 | 1 | 22 | 14 | 8 | 0 | 806.2581 | 806.2582 | -0.0001 |
| 21 | 13 | 9 | 1 | 21 | 13 | 8 | 0 | 806.2710 | 806.2711 | -0.0001 |
| 20 | 12 | 9 | 1 | 20 | 12 | 8 | 0 | 806.2839 | 806.2836 | 0.0003 |
| 19 | 11 | 9 | 1 | 19 | 11 | 8 | 0 | 806.2957 | 806.2957 | 0.0000 |
| 18 | 10 | 9 | 1 | 18 | 10 | 8 | 0 | 806.3076 | 806.3075 | 0.0001 |
| 5 | 1 | 5 | 1 | 6 | 1 | 6 | 0 | 806.3119 | 806.3119 | 0.0000 |
| 5 | 0 | 5 | 1 | 6 | 0 | 6 | 0 | 806.3119 | 806.3119 | 0.0000 |
| 17 | 9 | 9 | 1 | 17 | 9 | 8 | 0 | 806.3183 | 806.3188 | -0.0005 |
| 16 | 8 | 9 | 1 | 16 | 8 | 8 | 0 | 806.3302 | 806.3296 | 0.0006 |
| 15 | 7 | 9 | 1 | 15 | 7 | 8 | 0 | 806.3398 | 806.3400 | -0.0002 |
| 14 | 6 | 9 | 1 | 14 | 6 | 8 | 0 | 806.3495 | 806.3498 | -0.0003 |
| 13 | 5 | 9 | 1 | 13 | 5 | 8 | 0 | 806.3592 | 806.3591 | 0.0001 |
| 12 | 4 | 9 | 1 | 12 | 4 | 8 | 0 | 806.3678 | 806.3679 | -0.0001 |
| 11 | 3 | 9 | 1 | 11 | 3 | 8 | 0 | 806.3764 | 806.3761 | 0.0003 |
| 10 | 2 | 9 | 1 | 10 | 2 | 8 | 0 | 806.3840 | 806.3836 | 0.0004 |
| 9 | 1 | 9 | 1 | 9 | 1 | 8 | 0 | 806.3915 | 806.3906 | 0.0009 |
| 4 | 2 | 3 | 1 | 5 | 2 | 4 | 0 | 806.4098 | 806.4097 | 0.0001 |
| 4 | 1 | 3 | 1 | 5 | 1 | 4 | 0 | 806.4098 | 806.4099 | -0.0001 |
| 30 | 23 | 8 | 1 | 30 | 23 | 7 | 0 | 806.4281 | 806.4290 | -0.0009 |
| 29 | 22 | 8 | 1 | 29 | 22 | 7 | 0 | 806.4345 | 806.4331 | 0.0014 |
| 28 | 21 | 8 | 1 | 28 | 21 | 7 | 0 | 806.4410 | 806.4397 | 0.0013 |
| 27 | 20 | 8 | 1 | 27 | 20 | 7 | 0 | 806.4485 | 806.4480 | 0.0005 |
| 26 | 19 | 8 | 1 | 26 | 19 | 7 | 0 | 806.4582 | 806.4576 | 0.0006 |
| 25 | 18 | 8 | 1 | 25 | 18 | 7 | 0 | 806.4679 | 806.4680 | -0.0001 |
| 24 | 17 | 8 | 1 | 24 | 17 | 7 | 0 | 806.4776 | 806.4789 | -0.0013 |
| 23 | 16 | 8 | 1 | 23 | 16 | 7 | 0 | 806.4894 | 806.4901 | -0.0007 |
| 22 | 15 | 8 | 1 | 22 | 15 | 7 | 0 | 806.5013 | 806.5015 | -0.0002 |
| 21 | 14 | 8 | 1 | 21 | 14 | 7 | 0 | 806.5131 | 806.5128 | 0.0003 |
| 20 | 13 | 8 | 1 | 20 | 13 | 7 | 0 | 806.5249 | 806.5241 | 0.0008 |
| 19 | 12 | 8 | 1 | 19 | 12 | 7 | 0 | 806.5346 | 806.5352 | -0.0006 |
| 18 | 11 | 8 | 1 | 18 | 11 | 7 | 0 | 806.5454 | 806.5461 | -0.0007 |
| 17 | 10 | 8 | 1 | 17 | 10 | 7 | 0 | 806.5561 | 806.5566 | -0.0005 |
| 16 | 9 | 8 | 1 | 16 | 9 | 7 | 0 | 806.5669 | 806.5669 | 0.0000 |
| 15 | 8 | 8 | 1 | 15 | 8 | 7 | 0 | 806.5766 | 806.5767 | -0.0001 |
| 14 | 7 | 8 | 1 | 14 | 7 | 7 | 0 | 806.5863 | 806.5862 | 0.0001 |
| 13 | 6 | 8 | 1 | 13 | 6 | 7 | 0 | 806.5949 | 806.5951 | -0.0002 |
| 12 | 5 | 8 | 1 | 12 | 5 | 7 | 0 | 806.6035 | 806.6036 | -0.0001 |
| 11 | 4 | 8 | 1 | 11 | 4 | 7 | 0 | 806.6110 | 806.6116 | -0.0006 |
| 10 | 3 | 8 | 1 | 10 | 3 | 7 | 0 | 806.6175 | 806.6190 | -0.0015 |
| 9 | 2 | 8 | 1 | 9 | 2 | 7 | 0 | 806.6272 | 806.6258 | 0.0014 |
| 8 | 1 | 8 | 1 | 8 | 1 | 7 | 0 | 806.6347 | 806.6321 | 0.0026 |
| 4 | 0 | 4 | 1 | 5 | 0 | 5 | 0 | 806.6455 | 806.6456 | -0.0001 |
| 4 | 1 | 4 | 1 | 5 | 1 | 5 | 0 | 806.6455 | 806.6456 | -0.0001 |
| 3 | 1 | 2 | 1 | 4 | 1 | 3 | 0 | 806.7410 | 806.7418 | -0.0008 |
| 22 | 16 | 7 | 1 | 22 | 16 | 6 | 0 | 806.7574 | 806.7549 | 0.0025 |
| 21 | 15 | 7 | 1 | 21 | 15 | 6 | 0 | 806.7617 | 806.7622 | -0.0005 |
| 19 | 13 | 7 | 1 | 19 | 13 | 6 | 0 | 806.7778 | 806.7790 | -0.0012 |
| 18 | 12 | 7 | 1 | 18 | 12 | 6 | 0 | 806.7875 | 806.7880 | -0.0005 |
| 17 | 11 | 7 | 1 | 17 | 11 | 6 | 0 | 806.7972 | 806.7970 | 0.0002 |
| 16 | 10 | 7 | 1 | 16 | 10 | 6 | 0 | 806.8058 | 806.8061 | -0.0003 |
| 15 | 9 | 7 | 1 | 15 | 9 | 6 | 0 | 806.8144 | 806.8150 | -0.0006 |
| 14 | 8 | 7 | 1 | 14 | 8 | 6 | 0 | 806.8230 | 806.8236 | -0.0006 |
| 13 | 7 | 7 | 1 | 13 | 7 | 6 | 0 | 806.8316 | 806.8320 | -0.0004 |
| 12 | 6 | 7 | 1 | 12 | 6 | 6 | 0 | 806.8403 | 806.8400 | 0.0003 |
| 11 | 5 | 7 | 1 | 11 | 5 | 6 | 0 | 806.8478 | 806.8476 | 0.0002 |
| 10 | 4 | 7 | 1 | 10 | 4 | 6 | 0 | 806.8542 | 806.8547 | -0.0005 |
| 9 | 3 | 7 | 1 | 9 | 3 | 6 | 0 | 806.8618 | 806.8613 | 0.0005 |
| 8 | 2 | 7 | 1 | 8 | 2 | 6 | 0 | 806.8682 | 806.8674 | 0.0008 |
| 7 | 1 | 7 | 1 | 7 | 1 | 6 | 0 | 806.8725 | 806.8729 | -0.0004 |
| 3 | 1 | 3 | 1 | 4 | 1 | 4 | 0 | 806.9791 | 806.9787 | 0.0004 |
| 3 | 0 | 3 | 1 | 4 | 0 | 4 | 0 | 806.9791 | 806.9787 | 0.0004 |
| 2 | 2 | 1 | 1 | 3 | 2 | 2 | 0 | 807.0641 | 807.0626 | 0.0015 |
| 2 | 1 | 1 | 1 | 3 | 1 | 2 | 0 | 807.0910 | 807.0903 | 0.0007 |
| 2 | 0 | 2 | 1 | 3 | 0 | 3 | 0 | 807.3127 | 807.3109 | 0.0018 |
| 2 | 1 | 2 | 1 | 3 | 1 | 3 | 0 | 807.3127 | 807.3114 | 0.0013 |
| 1 | 1 | 0 | 1 | 2 | 1 | 1 | 0 | 807.4181 | 807.4200 | -0.0019 |
| 1 | 0 | 1 | 1 | 2 | 0 | 2 | 0 | 807.6495 | 807.6476 | 0.0019 |
| 0 | 0 | 0 | 1 | 1 | 1 | 1 | 0 | 807.9670 | 807.9697 | -0.0027 |
| 0 | 0 | 0 | 1 | 1 | 0 | 1 | 0 | 807.9767 | 807.9783 | -0.0016 |
| 1 | 0 | 1 | 1 | 0 | 0 | 0 | 0 | 808.8720 | 808.8740 | -0.0020 |
| 2 | 0 | 2 | 1 | 1 | 0 | 1 | 0 | 809.2046 | 809.2027 | 0.0019 |
| 2 | 1 | 1 | 1 | 1 | 1 | 0 | 0 | 809.4456 | 809.4471 | -0.0015 |
| 3 | 1 | 3 | 1 | 2 | 1 | 2 | 0 | 809.5274 | 809.5270 | 0.0004 |
| 3 | 0 | 3 | 1 | 2 | 0 | 2 | 0 | 809.5274 | 809.5275 | -0.0001 |
| 3 | 2 | 2 | 1 | 2 | 2 | 1 | 0 | 809.7480 | 809.7499 | -0.0019 |
| 3 | 1 | 2 | 1 | 2 | 1 | 1 | 0 | 809.7728 | 809.7734 | -0.0006 |
| 4 | 1 | 4 | 1 | 3 | 1 | 3 | 0 | 809.8556 | 809.8549 | 0.0007 |
| 4 | 0 | 4 | 1 | 3 | 0 | 3 | 0 | 809.8556 | 809.8550 | 0.0006 |
| 3 | 2 | 1 | 1 | 2 | 2 | 0 | 0 | 810.0224 | 810.0235 | -0.0011 |
| 4 | 2 | 3 | 1 | 3 | 2 | 2 | 0 | 810.0892 | 810.0891 | 0.0001 |
| 4 | 1 | 3 | 1 | 3 | 1 | 2 | 0 | 810.0892 | 810.0916 | -0.0024 |
| 5 | 1 | 5 | 1 | 4 | 1 | 4 | 0 | 810.1817 | 810.1820 | -0.0003 |
| 5 | 0 | 5 | 1 | 4 | 0 | 4 | 0 | 810.1817 | 810.1820 | -0.0003 |
| 4 | 3 | 2 | 1 | 3 | 3 | 1 | 0 | 810.3033 | 810.3001 | 0.0032 |
| 4 | 2 | 2 | 1 | 3 | 2 | 1 | 0 | 810.3453 | 810.3450 | 0.0003 |
| 5 | 2 | 4 | 1 | 4 | 2 | 3 | 0 | 810.4174 | 810.4172 | 0.0002 |
| 5 | 1 | 4 | 1 | 4 | 1 | 3 | 0 | 810.4174 | 810.4173 | 0.0001 |
| 6 | 0 | 6 | 1 | 5 | 0 | 5 | 0 | 810.5078 | 810.5084 | -0.0006 |
| 6 | 1 | 6 | 1 | 5 | 1 | 5 | 0 | 810.5078 | 810.5084 | -0.0006 |
| 4 | 3 | 1 | 1 | 3 | 3 | 0 | 0 | 810.6046 | 810.6026 | 0.0020 |
| 5 | 3 | 3 | 1 | 4 | 3 | 2 | 0 | 810.6498 | 810.6494 | 0.0004 |
| 5 | 2 | 3 | 1 | 4 | 2 | 2 | 0 | 810.6531 | 810.6568 | -0.0037 |
| 6 | 2 | 5 | 1 | 5 | 2 | 4 | 0 | 810.7435 | 810.7435 | 0.0000 |
| 6 | 1 | 5 | 1 | 5 | 1 | 4 | 0 | 810.7435 | 810.7436 | -0.0001 |
| 7 | 0 | 7 | 1 | 6 | 0 | 6 | 0 | 810.8339 | 810.8342 | -0.0003 |
| 7 | 1 | 7 | 1 | 6 | 1 | 6 | 0 | 810.8339 | 810.8342 | -0.0003 |
| 5 | 4 | 2 | 1 | 4 | 4 | 1 | 0 | 810.8457 | 810.8454 | 0.0003 |
| 5 | 3 | 2 | 1 | 4 | 3 | 1 | 0 | 810.9156 | 810.9158 | -0.0002 |
| 6 | 3 | 4 | 1 | 5 | 3 | 3 | 0 | 810.9791 | 810.9787 | 0.0004 |
| 6 | 2 | 4 | 1 | 5 | 2 | 3 | 0 | 810.9791 | 810.9791 | 0.0000 |
| 7 | 2 | 6 | 1 | 6 | 2 | 5 | 0 | 811.0685 | 811.0692 | -0.0007 |
| 7 | 1 | 6 | 1 | 6 | 1 | 5 | 0 | 811.0685 | 811.0692 | -0.0007 |
| 8 | 1 | 8 | 1 | 7 | 1 | 7 | 0 | 811.1589 | 811.1593 | -0.0004 |
| 8 | 0 | 8 | 1 | 7 | 0 | 7 | 0 | 811.1589 | 811.1593 | -0.0004 |
| 6 | 4 | 3 | 1 | 5 | 4 | 2 | 0 | 811.2084 | 811.2070 | 0.0014 |
| 7 | 3 | 5 | 1 | 6 | 3 | 4 | 0 | 811.3041 | 811.3044 | -0.0003 |
| 7 | 2 | 5 | 1 | 6 | 2 | 4 | 0 | 811.3041 | 811.3044 | -0.0003 |
| 6 | 5 | 2 | 1 | 5 | 5 | 1 | 0 | 811.3859 | 811.3857 | 0.0002 |
| 8 | 1 | 7 | 1 | 7 | 1 | 6 | 0 | 811.3945 | 811.3942 | 0.0003 |
| 8 | 2 | 7 | 1 | 7 | 2 | 6 | 0 | 811.3945 | 811.3942 | 0.0003 |
| 9 | 1 | 9 | 1 | 8 | 1 | 8 | 0 | 811.4839 | 811.4837 | 0.0002 |
| 9 | 0 | 9 | 1 | 8 | 0 | 8 | 0 | 811.4839 | 811.4837 | 0.0002 |
| 6 | 4 | 2 | 1 | 5 | 4 | 1 | 0 | 811.4839 | 811.4840 | -0.0001 |
| 7 | 4 | 4 | 1 | 6 | 4 | 3 | 0 | 811.5387 | 811.5394 | -0.0007 |
| 7 | 3 | 4 | 1 | 6 | 3 | 3 | 0 | 811.5387 | 811.5407 | -0.0020 |
| 8 | 3 | 6 | 1 | 7 | 3 | 5 | 0 | 811.6291 | 811.6292 | -0.0001 |
| 8 | 2 | 6 | 1 | 7 | 2 | 5 | 0 | 811.6291 | 811.6292 | -0.0001 |
| 9 | 1 | 8 | 1 | 8 | 1 | 7 | 0 | 811.7185 | 811.7185 | 0.0000 |
| 9 | 2 | 8 | 1 | 8 | 2 | 7 | 0 | 811.7185 | 811.7185 | 0.0000 |
| 7 | 4 | 3 | 1 | 6 | 4 | 2 | 0 | 811.7916 | 811.7951 | -0.0035 |
| 10 | 1 | 10 | 1 | 9 | 1 | 9 | 0 | 811.8078 | 811.8074 | 0.0004 |
| 10 | 0 | 10 | 1 | 9 | 0 | 9 | 0 | 811.8078 | 811.8074 | 0.0004 |
| 8 | 4 | 5 | 1 | 7 | 4 | 4 | 0 | 811.8648 | 811.8645 | 0.0003 |
| 8 | 3 | 5 | 1 | 7 | 3 | 4 | 0 | 811.8648 | 811.8646 | 0.0002 |
| 9 | 2 | 7 | 1 | 8 | 2 | 6 | 0 | 811.9531 | 811.9534 | -0.0003 |
| 9 | 3 | 7 | 1 | 8 | 3 | 6 | 0 | 811.9531 | 811.9534 | -0.0003 |
| 10 | 1 | 9 | 1 | 9 | 1 | 8 | 0 | 812.0424 | 812.0422 | 0.0002 |
| 10 | 2 | 9 | 1 | 9 | 2 | 8 | 0 | 812.0424 | 812.0422 | 0.0002 |
| 11 | 1 | 11 | 1 | 10 | 1 | 10 | 0 | 812.1306 | 812.1305 | 0.0001 |
| 11 | 0 | 11 | 1 | 10 | 0 | 10 | 0 | 812.1306 | 812.1305 | 0.0001 |
| 9 | 4 | 6 | 1 | 8 | 4 | 5 | 0 | 812.1877 | 812.1886 | -0.0009 |
| 9 | 3 | 6 | 1 | 8 | 3 | 5 | 0 | 812.1877 | 812.1886 | -0.0009 |
| 10 | 2 | 8 | 1 | 9 | 2 | 7 | 0 | 812.2770 | 812.2770 | 0.0000 |
| 10 | 3 | 8 | 1 | 9 | 3 | 7 | 0 | 812.2770 | 812.2770 | 0.0000 |
| 8 | 6 | 3 | 1 | 7 | 6 | 2 | 0 | 812.3082 | 812.3098 | -0.0016 |
| 11 | 1 | 10 | 1 | 10 | 1 | 9 | 0 | 812.3652 | 812.3651 | 0.0001 |
| 11 | 2 | 10 | 1 | 10 | 2 | 9 | 0 | 812.3652 | 812.3651 | 0.0001 |
| 9 | 5 | 5 | 1 | 8 | 5 | 4 | 0 | 812.4244 | 812.4240 | 0.0004 |
| 9 | 4 | 5 | 1 | 8 | 4 | 4 | 0 | 812.4244 | 812.4242 | 0.0002 |
| 12 | 1 | 12 | 1 | 11 | 1 | 11 | 0 | 812.4524 | 812.4529 | -0.0005 |
| 12 | 0 | 12 | 1 | 11 | 0 | 11 | 0 | 812.4524 | 812.4529 | -0.0005 |
| 10 | 4 | 7 | 1 | 9 | 4 | 6 | 0 | 812.5116 | 812.5120 | -0.0004 |
| 10 | 3 | 7 | 1 | 9 | 3 | 6 | 0 | 812.5116 | 812.5120 | -0.0004 |
| 11 | 2 | 9 | 1 | 10 | 2 | 8 | 0 | 812.5998 | 812.5999 | -0.0001 |
| 11 | 3 | 9 | 1 | 10 | 3 | 8 | 0 | 812.5998 | 812.5999 | -0.0001 |
| 9 | 6 | 4 | 1 | 8 | 6 | 3 | 0 | 812.6569 | 812.6581 | -0.0012 |
| 9 | 5 | 4 | 1 | 8 | 5 | 3 | 0 | 812.6644 | 812.6647 | -0.0003 |
| 12 | 1 | 11 | 1 | 11 | 1 | 10 | 0 | 812.6870 | 812.6875 | -0.0005 |
| 12 | 2 | 11 | 1 | 11 | 2 | 10 | 0 | 812.6870 | 812.6875 | -0.0005 |
| 10 | 5 | 6 | 1 | 9 | 5 | 5 | 0 | 812.7473 | 812.7472 | 0.0001 |
| 10 | 4 | 6 | 1 | 9 | 4 | 5 | 0 | 812.7473 | 812.7472 | 0.0001 |
| 13 | 1 | 13 | 1 | 12 | 1 | 12 | 0 | 812.7742 | 812.7746 | -0.0004 |
| 13 | 0 | 13 | 1 | 12 | 0 | 12 | 0 | 812.7742 | 812.7746 | -0.0004 |
| 11 | 3 | 8 | 1 | 10 | 3 | 7 | 0 | 812.8344 | 812.8347 | -0.0003 |
| 11 | 4 | 8 | 1 | 10 | 4 | 7 | 0 | 812.8344 | 812.8347 | -0.0003 |
| 12 | 2 | 10 | 1 | 11 | 2 | 9 | 0 | 812.9216 | 812.9221 | -0.0005 |
| 12 | 3 | 10 | 1 | 11 | 3 | 9 | 0 | 812.9216 | 812.9221 | -0.0005 |
| 9 | 6 | 3 | 1 | 8 | 6 | 2 | 0 | 812.9496 | 812.9507 | -0.0011 |
| 9 | 8 | 2 | 1 | 8 | 8 | 1 | 0 | 812.9776 | 812.9767 | 0.0009 |
| 10 | 6 | 5 | 1 | 9 | 6 | 4 | 0 | 812.9829 | 812.9829 | 0.0000 |
| 10 | 5 | 5 | 1 | 9 | 5 | 4 | 0 | 812.9829 | 812.9835 | -0.0006 |
| 13 | 1 | 12 | 1 | 12 | 1 | 11 | 0 | 813.0088 | 813.0091 | -0.0003 |
| 13 | 2 | 12 | 1 | 12 | 2 | 11 | 0 | 813.0088 | 813.0091 | -0.0003 |
| 11 | 4 | 7 | 1 | 10 | 4 | 6 | 0 | 813.0701 | 813.0698 | 0.0003 |
| 14 | 1 | 14 | 1 | 13 | 1 | 13 | 0 | 813.0959 | 813.0957 | 0.0002 |
| 14 | 0 | 14 | 1 | 13 | 0 | 13 | 0 | 813.0959 | 813.0957 | 0.0002 |
| 12 | 3 | 9 | 1 | 11 | 3 | 8 | 0 | 813.1573 | 813.1568 | 0.0005 |
| 12 | 4 | 9 | 1 | 11 | 4 | 8 | 0 | 813.1573 | 813.1568 | 0.0005 |
| 10 | 6 | 4 | 1 | 9 | 6 | 3 | 0 | 813.2294 | 813.2284 | 0.0010 |
| 13 | 2 | 11 | 1 | 12 | 2 | 10 | 0 | 813.2434 | 813.2436 | -0.0002 |
| 13 | 3 | 11 | 1 | 12 | 3 | 10 | 0 | 813.2434 | 813.2436 | -0.0002 |
| 11 | 6 | 6 | 1 | 10 | 6 | 5 | 0 | 813.3047 | 813.3052 | -0.0005 |
| 11 | 5 | 6 | 1 | 10 | 5 | 5 | 0 | 813.3047 | 813.3052 | -0.0005 |
| 14 | 1 | 13 | 1 | 13 | 1 | 12 | 0 | 813.3305 | 813.3301 | 0.0004 |
| 14 | 2 | 13 | 1 | 13 | 2 | 12 | 0 | 813.3305 | 813.3301 | 0.0004 |
| 12 | 5 | 8 | 1 | 11 | 5 | 7 | 0 | 813.3919 | 813.3917 | 0.0002 |
| 12 | 4 | 8 | 1 | 11 | 4 | 7 | 0 | 813.3919 | 813.3917 | 0.0002 |
| 15 | 1 | 15 | 1 | 14 | 1 | 14 | 0 | 813.4156 | 813.4161 | -0.0005 |
| 15 | 0 | 15 | 1 | 14 | 0 | 14 | 0 | 813.4156 | 813.4161 | -0.0005 |
| 13 | 3 | 10 | 1 | 12 | 3 | 9 | 0 | 813.4780 | 813.4783 | -0.0003 |
| 13 | 4 | 10 | 1 | 12 | 4 | 9 | 0 | 813.4780 | 813.4783 | -0.0003 |
| 11 | 7 | 5 | 1 | 10 | 7 | 4 | 0 | 813.5415 | 813.5411 | 0.0004 |
| 11 | 6 | 5 | 1 | 10 | 6 | 4 | 0 | 813.5415 | 813.5426 | -0.0011 |
| 14 | 2 | 12 | 1 | 13 | 2 | 11 | 0 | 813.5641 | 813.5645 | -0.0004 |
| 14 | 3 | 12 | 1 | 13 | 3 | 11 | 0 | 813.5641 | 813.5645 | -0.0004 |
| 12 | 6 | 7 | 1 | 11 | 6 | 6 | 0 | 813.6265 | 813.6269 | -0.0004 |
| 12 | 5 | 7 | 1 | 11 | 5 | 6 | 0 | 813.6265 | 813.6269 | -0.0004 |
| 15 | 1 | 14 | 1 | 14 | 1 | 13 | 0 | 813.6502 | 813.6504 | -0.0002 |
| 15 | 2 | 14 | 1 | 14 | 2 | 13 | 0 | 813.6502 | 813.6504 | -0.0002 |
| 13 | 4 | 9 | 1 | 12 | 4 | 8 | 0 | 813.7136 | 813.7130 | 0.0006 |
| 13 | 5 | 9 | 1 | 12 | 5 | 8 | 0 | 813.7136 | 813.7130 | 0.0006 |
| 16 | 1 | 16 | 1 | 15 | 1 | 15 | 0 | 813.7352 | 813.7358 | -0.0006 |
| 16 | 0 | 16 | 1 | 15 | 0 | 15 | 0 | 813.7352 | 813.7358 | -0.0006 |
| 11 | 8 | 4 | 1 | 10 | 8 | 3 | 0 | 813.7707 | 813.7713 | -0.0006 |
| 14 | 3 | 11 | 1 | 13 | 3 | 10 | 0 | 813.7987 | 813.7990 | -0.0003 |
| 14 | 4 | 11 | 1 | 13 | 4 | 10 | 0 | 813.7987 | 813.7990 | -0.0003 |
| 12 | 7 | 6 | 1 | 11 | 7 | 5 | 0 | 813.8632 | 813.8626 | 0.0006 |
| 12 | 6 | 6 | 1 | 11 | 6 | 5 | 0 | 813.8632 | 813.8627 | 0.0005 |
| 15 | 2 | 13 | 1 | 14 | 2 | 12 | 0 | 813.8848 | 813.8847 | 0.0001 |
| 15 | 3 | 13 | 1 | 14 | 3 | 12 | 0 | 813.8848 | 813.8847 | 0.0001 |
| 13 | 5 | 8 | 1 | 12 | 5 | 7 | 0 | 813.9482 | 813.9480 | 0.0002 |
| 13 | 5 | 8 | 1 | 12 | 5 | 7 | 0 | 813.9482 | 813.9480 | 0.0002 |
| 16 | 1 | 15 | 1 | 15 | 1 | 14 | 0 | 813.9698 | 813.9700 | -0.0002 |
| 16 | 2 | 15 | 1 | 15 | 2 | 14 | 0 | 813.9698 | 813.9700 | -0.0002 |
| 14 | 4 | 10 | 1 | 13 | 4 | 9 | 0 | 814.0343 | 814.0337 | 0.0006 |
| 14 | 5 | 10 | 1 | 13 | 5 | 9 | 0 | 814.0343 | 814.0337 | 0.0006 |
| 17 | 1 | 17 | 1 | 16 | 1 | 16 | 0 | 814.0548 | 814.0549 | -0.0001 |
| 17 | 0 | 17 | 1 | 16 | 0 | 16 | 0 | 814.0548 | 814.0549 | -0.0001 |
| 12 | 8 | 5 | 1 | 11 | 8 | 4 | 0 | 814.0989 | 814.0987 | 0.0002 |
| 12 | 7 | 5 | 1 | 11 | 7 | 4 | 0 | 814.1021 | 814.1017 | 0.0004 |
| 15 | 3 | 12 | 1 | 14 | 3 | 11 | 0 | 814.1194 | 814.1191 | 0.0003 |
| 15 | 4 | 12 | 1 | 14 | 4 | 11 | 0 | 814.1194 | 814.1191 | 0.0003 |
| 11 | 8 | 3 | 1 | 10 | 8 | 2 | 0 | 814.1258 | 814.1259 | -0.0001 |
| 13 | 7 | 7 | 1 | 12 | 7 | 6 | 0 | 814.1829 | 814.1833 | -0.0004 |
| 13 | 6 | 7 | 1 | 12 | 6 | 6 | 0 | 814.1829 | 814.1833 | -0.0004 |
| 16 | 2 | 14 | 1 | 15 | 2 | 13 | 0 | 814.2044 | 814.2043 | 0.0001 |
| 16 | 3 | 14 | 1 | 15 | 3 | 13 | 0 | 814.2044 | 814.2043 | 0.0001 |
| 11 | 9 | 2 | 1 | 10 | 9 | 1 | 0 | 814.2291 | 814.2329 | -0.0038 |
| 14 | 5 | 9 | 1 | 13 | 5 | 8 | 0 | 814.2679 | 814.2685 | -0.0006 |
| 14 | 6 | 9 | 1 | 13 | 6 | 8 | 0 | 814.2679 | 814.2685 | -0.0006 |
| 17 | 1 | 16 | 1 | 16 | 1 | 15 | 0 | 814.2894 | 814.2890 | 0.0004 |
| 17 | 2 | 16 | 1 | 16 | 2 | 15 | 0 | 814.2894 | 814.2890 | 0.0004 |
| 12 | 9 | 4 | 1 | 11 | 9 | 3 | 0 | 814.3249 | 814.3250 | -0.0001 |
| 15 | 5 | 11 | 1 | 14 | 5 | 10 | 0 | 814.3540 | 814.3537 | 0.0003 |
| 15 | 4 | 11 | 1 | 14 | 4 | 10 | 0 | 814.3540 | 814.3537 | 0.0003 |
| 12 | 8 | 4 | 1 | 11 | 8 | 3 | 0 | 814.3615 | 814.3624 | -0.0009 |
| 18 | 1 | 18 | 1 | 17 | 1 | 17 | 0 | 814.3733 | 814.3732 | 0.0001 |
| 18 | 0 | 18 | 1 | 17 | 0 | 17 | 0 | 814.3733 | 814.3732 | 0.0001 |
| 13 | 8 | 6 | 1 | 12 | 8 | 5 | 0 | 814.4196 | 814.4195 | 0.0001 |
| 13 | 7 | 6 | 1 | 12 | 7 | 5 | 0 | 814.4196 | 814.4197 | -0.0001 |
| 12 | 10 | 3 | 1 | 11 | 10 | 2 | 0 | 814.4196 | 814.4220 | -0.0024 |
| 16 | 3 | 13 | 1 | 15 | 3 | 12 | 0 | 814.4390 | 814.4386 | 0.0004 |
| 16 | 4 | 13 | 1 | 15 | 4 | 12 | 0 | 814.4390 | 814.4386 | 0.0004 |
| 14 | 7 | 8 | 1 | 13 | 7 | 7 | 0 | 814.5035 | 814.5035 | 0.0000 |
| 14 | 6 | 8 | 1 | 13 | 6 | 7 | 0 | 814.5035 | 814.5035 | 0.0000 |
| 17 | 3 | 15 | 1 | 16 | 3 | 14 | 0 | 814.5229 | 814.5231 | -0.0002 |
| 17 | 2 | 15 | 1 | 16 | 2 | 14 | 0 | 814.5229 | 814.5231 | -0.0002 |
| 12 | 11 | 2 | 1 | 11 | 11 | 1 | 0 | 814.5294 | 814.5268 | 0.0027 |
| 15 | 6 | 10 | 1 | 14 | 6 | 9 | 0 | 814.5886 | 814.5883 | 0.0003 |
| 15 | 5 | 10 | 1 | 14 | 5 | 9 | 0 | 814.5886 | 814.5883 | 0.0003 |
| 18 | 2 | 17 | 1 | 17 | 2 | 16 | 0 | 814.6069 | 814.6072 | -0.0003 |
| 18 | 1 | 17 | 1 | 17 | 1 | 16 | 0 | 814.6069 | 814.6072 | -0.0003 |
| 13 | 9 | 5 | 1 | 12 | 9 | 4 | 0 | 814.6553 | 814.6553 | 0.0000 |
| 13 | 8 | 5 | 1 | 12 | 8 | 4 | 0 | 814.6596 | 814.6614 | -0.0018 |
| 16 | 5 | 12 | 1 | 15 | 5 | 11 | 0 | 814.6736 | 814.6730 | 0.0006 |
| 16 | 4 | 12 | 1 | 15 | 4 | 11 | 0 | 814.6736 | 814.6730 | 0.0006 |
| 19 | 1 | 19 | 1 | 18 | 1 | 18 | 0 | 814.6908 | 814.6910 | -0.0002 |
| 19 | 0 | 19 | 1 | 18 | 0 | 18 | 0 | 814.6908 | 814.6910 | -0.0002 |
| 12 | 9 | 3 | 1 | 11 | 9 | 2 | 0 | 814.7188 | 814.7198 | -0.0010 |
| 14 | 8 | 7 | 1 | 13 | 8 | 6 | 0 | 814.7392 | 814.7391 | 0.0001 |
| 14 | 7 | 7 | 1 | 13 | 7 | 6 | 0 | 814.7392 | 814.7391 | 0.0001 |
| 17 | 4 | 14 | 1 | 16 | 4 | 13 | 0 | 814.7575 | 814.7573 | 0.0002 |
| 17 | 3 | 14 | 1 | 16 | 3 | 13 | 0 | 814.7575 | 814.7573 | 0.0002 |
| 15 | 6 | 9 | 1 | 14 | 6 | 8 | 0 | 814.8232 | 814.8232 | 0.0000 |
| 15 | 7 | 9 | 1 | 14 | 7 | 8 | 0 | 814.8232 | 814.8232 | 0.0000 |
| 18 | 3 | 16 | 1 | 17 | 3 | 15 | 0 | 814.8415 | 814.8413 | 0.0002 |
| 18 | 2 | 16 | 1 | 17 | 2 | 15 | 0 | 814.8415 | 814.8413 | 0.0002 |
| 16 | 6 | 11 | 1 | 15 | 6 | 10 | 0 | 814.9071 | 814.9075 | -0.0004 |
| 16 | 5 | 11 | 1 | 15 | 5 | 10 | 0 | 814.9071 | 814.9075 | -0.0004 |
| 19 | 2 | 18 | 1 | 18 | 2 | 17 | 0 | 814.9254 | 814.9248 | 0.0006 |
| 19 | 1 | 18 | 1 | 18 | 1 | 17 | 0 | 814.9254 | 814.9248 | 0.0006 |
| 14 | 9 | 6 | 1 | 13 | 9 | 5 | 0 | 814.9760 | 814.9758 | 0.0002 |
| 14 | 8 | 6 | 1 | 13 | 8 | 5 | 0 | 814.9760 | 814.9762 | -0.0002 |
| 17 | 5 | 13 | 1 | 16 | 5 | 12 | 0 | 814.9921 | 814.9916 | 0.0005 |
| 17 | 4 | 13 | 1 | 16 | 4 | 12 | 0 | 814.9921 | 814.9916 | 0.0005 |
| 20 | 1 | 20 | 1 | 19 | 1 | 19 | 0 | 815.0083 | 815.0080 | 0.0003 |
| 20 | 0 | 20 | 1 | 19 | 0 | 19 | 0 | 815.0083 | 815.0080 | 0.0003 |
| 15 | 8 | 8 | 1 | 14 | 8 | 7 | 0 | 815.0588 | 815.0584 | 0.0004 |
| 15 | 7 | 8 | 1 | 14 | 7 | 7 | 0 | 815.0588 | 815.0584 | 0.0004 |
| 18 | 4 | 15 | 1 | 17 | 4 | 14 | 0 | 815.0761 | 815.0754 | 0.0007 |
| 18 | 3 | 15 | 1 | 17 | 3 | 14 | 0 | 815.0761 | 815.0754 | 0.0007 |
| 16 | 6 | 10 | 1 | 15 | 6 | 9 | 0 | 815.1428 | 815.1422 | 0.0006 |
| 16 | 7 | 10 | 1 | 15 | 7 | 9 | 0 | 815.1428 | 815.1422 | 0.0006 |
| 19 | 3 | 17 | 1 | 18 | 3 | 16 | 0 | 815.1589 | 815.1588 | 0.0001 |
| 19 | 2 | 17 | 1 | 18 | 2 | 16 | 0 | 815.1589 | 815.1588 | 0.0001 |
| 14 | 10 | 5 | 1 | 13 | 10 | 4 | 0 | 815.2117 | 815.2108 | 0.0009 |
| 14 | 9 | 5 | 1 | 13 | 9 | 4 | 0 | 815.2213 | 815.2222 | -0.0009 |
| 17 | 6 | 12 | 1 | 16 | 6 | 11 | 0 | 815.2256 | 815.2260 | -0.0004 |
| 17 | 5 | 12 | 1 | 16 | 5 | 11 | 0 | 815.2256 | 815.2260 | -0.0004 |
| 20 | 2 | 19 | 1 | 19 | 2 | 18 | 0 | 815.2418 | 815.2418 | 0.0000 |
| 20 | 1 | 19 | 1 | 19 | 1 | 18 | 0 | 815.2418 | 815.2418 | 0.0000 |
| 15 | 9 | 7 | 1 | 14 | 9 | 6 | 0 | 815.2945 | 815.2943 | 0.0002 |
| 15 | 8 | 7 | 1 | 14 | 8 | 6 | 0 | 815.2945 | 815.2944 | 0.0001 |
| 18 | 5 | 14 | 1 | 17 | 5 | 13 | 0 | 815.3096 | 815.3096 | 0.0000 |
| 18 | 4 | 14 | 1 | 17 | 4 | 13 | 0 | 815.3096 | 815.3096 | 0.0000 |
| 13 | 10 | 3 | 1 | 12 | 10 | 2 | 0 | 815.3171 | 815.3168 | 0.0003 |
| 21 | 1 | 21 | 1 | 20 | 1 | 20 | 0 | 815.3247 | 815.3243 | 0.0004 |
| 21 | 0 | 21 | 1 | 20 | 0 | 20 | 0 | 815.3247 | 815.3243 | 0.0004 |
| 16 | 8 | 9 | 1 | 15 | 8 | 8 | 0 | 815.3774 | 815.3772 | 0.0002 |
| 16 | 7 | 9 | 1 | 15 | 7 | 8 | 0 | 815.3774 | 815.3772 | 0.0002 |
| 19 | 4 | 16 | 1 | 18 | 4 | 15 | 0 | 815.3924 | 815.3928 | -0.0004 |
| 19 | 3 | 16 | 1 | 18 | 3 | 15 | 0 | 815.3924 | 815.3928 | -0.0004 |
| 14 | 11 | 4 | 1 | 13 | 11 | 3 | 0 | 815.4237 | 815.4241 | -0.0004 |
| 17 | 6 | 11 | 1 | 16 | 6 | 10 | 0 | 815.4602 | 815.4606 | -0.0004 |
| 17 | 7 | 11 | 1 | 16 | 7 | 10 | 0 | 815.4602 | 815.4606 | -0.0004 |
| 20 | 3 | 18 | 1 | 19 | 3 | 17 | 0 | 815.4753 | 815.4756 | -0.0003 |
| 20 | 2 | 18 | 1 | 19 | 2 | 17 | 0 | 815.4753 | 815.4756 | -0.0003 |
| 14 | 10 | 4 | 1 | 13 | 10 | 3 | 0 | 815.5065 | 815.5080 | -0.0015 |
| 15 | 10 | 6 | 1 | 14 | 10 | 5 | 0 | 815.5313 | 815.5315 | -0.0002 |
| 15 | 9 | 6 | 1 | 14 | 9 | 5 | 0 | 815.5313 | 815.5325 | -0.0012 |
| 18 | 6 | 13 | 1 | 17 | 6 | 12 | 0 | 815.5442 | 815.5439 | 0.0003 |
| 18 | 5 | 13 | 1 | 17 | 5 | 12 | 0 | 815.5442 | 815.5439 | 0.0003 |
| 21 | 2 | 20 | 1 | 20 | 2 | 19 | 0 | 815.5582 | 815.5580 | 0.0002 |
| 21 | 1 | 20 | 1 | 20 | 1 | 19 | 0 | 815.5582 | 815.5580 | 0.0002 |
| 16 | 9 | 8 | 1 | 15 | 9 | 7 | 0 | 815.6131 | 815.6126 | 0.0005 |
| 16 | 8 | 8 | 1 | 15 | 8 | 7 | 0 | 815.6131 | 815.6126 | 0.0005 |
| 19 | 5 | 15 | 1 | 18 | 5 | 14 | 0 | 815.6271 | 815.6269 | 0.0002 |
| 19 | 4 | 15 | 1 | 18 | 4 | 14 | 0 | 815.6271 | 815.6269 | 0.0002 |
| 22 | 1 | 22 | 1 | 21 | 1 | 21 | 0 | 815.6400 | 815.6400 | 0.0000 |
| 22 | 0 | 22 | 1 | 21 | 0 | 21 | 0 | 815.6400 | 815.6400 | 0.0000 |
| 17 | 7 | 10 | 1 | 16 | 7 | 9 | 0 | 815.6959 | 815.6953 | 0.0006 |
| 17 | 8 | 10 | 1 | 16 | 8 | 9 | 0 | 815.6959 | 815.6953 | 0.0006 |
| 20 | 4 | 17 | 1 | 19 | 4 | 16 | 0 | 815.7099 | 815.7095 | 0.0004 |
| 20 | 3 | 17 | 1 | 19 | 3 | 16 | 0 | 815.7099 | 815.7095 | 0.0004 |
| 18 | 6 | 12 | 1 | 17 | 6 | 11 | 0 | 815.7788 | 815.7783 | 0.0005 |
| 18 | 7 | 12 | 1 | 17 | 7 | 11 | 0 | 815.7788 | 815.7783 | 0.0005 |
| 21 | 3 | 19 | 1 | 20 | 3 | 18 | 0 | 815.7917 | 815.7918 | -0.0001 |
| 21 | 2 | 19 | 1 | 20 | 2 | 18 | 0 | 815.7917 | 815.7918 | -0.0001 |
| 16 | 10 | 7 | 1 | 15 | 10 | 6 | 0 | 815.8487 | 815.8489 | -0.0002 |
| 16 | 9 | 7 | 1 | 15 | 9 | 6 | 0 | 815.8487 | 815.8490 | -0.0003 |
| 19 | 6 | 14 | 1 | 18 | 6 | 13 | 0 | 815.8617 | 815.8611 | 0.0006 |
| 19 | 5 | 14 | 1 | 18 | 5 | 13 | 0 | 815.8617 | 815.8611 | 0.0006 |
| 22 | 2 | 21 | 1 | 21 | 2 | 20 | 0 | 815.8735 | 815.8736 | -0.0001 |
| 22 | 1 | 21 | 1 | 21 | 1 | 20 | 0 | 815.8735 | 815.8736 | -0.0001 |
| 17 | 9 | 9 | 1 | 16 | 9 | 8 | 0 | 815.9305 | 815.9304 | 0.0001 |
| 17 | 8 | 9 | 1 | 16 | 8 | 8 | 0 | 815.9305 | 815.9304 | 0.0001 |
| 20 | 5 | 16 | 1 | 19 | 5 | 15 | 0 | 815.9434 | 815.9435 | -0.0001 |
| 20 | 4 | 16 | 1 | 19 | 4 | 15 | 0 | 815.9434 | 815.9435 | -0.0001 |
| 23 | 1 | 23 | 1 | 22 | 1 | 22 | 0 | 815.9553 | 815.9550 | 0.0003 |
| 23 | 0 | 23 | 1 | 22 | 0 | 22 | 0 | 815.9553 | 815.9550 | 0.0003 |
| 18 | 7 | 11 | 1 | 17 | 7 | 10 | 0 | 816.0134 | 816.0129 | 0.0005 |
| 18 | 8 | 11 | 1 | 17 | 8 | 10 | 0 | 816.0134 | 816.0129 | 0.0005 |
| 21 | 4 | 18 | 1 | 20 | 4 | 17 | 0 | 816.0263 | 816.0256 | 0.0007 |
| 21 | 3 | 18 | 1 | 20 | 3 | 17 | 0 | 816.0263 | 816.0256 | 0.0007 |
| 16 | 11 | 6 | 1 | 15 | 11 | 5 | 0 | 816.0876 | 816.0868 | 0.0008 |
| 16 | 10 | 6 | 1 | 15 | 10 | 5 | 0 | 816.0876 | 816.0887 | -0.0011 |
| 19 | 6 | 13 | 1 | 18 | 6 | 12 | 0 | 816.0952 | 816.0954 | -0.0002 |
| 19 | 7 | 13 | 1 | 18 | 7 | 12 | 0 | 816.0952 | 816.0954 | -0.0002 |
| 22 | 3 | 20 | 1 | 21 | 3 | 19 | 0 | 816.1070 | 816.1073 | -0.0003 |
| 22 | 2 | 20 | 1 | 21 | 2 | 19 | 0 | 816.1070 | 816.1073 | -0.0003 |
| 17 | 10 | 8 | 1 | 16 | 10 | 7 | 0 | 816.1662 | 816.1661 | 0.0001 |
| 17 | 9 | 8 | 1 | 16 | 9 | 7 | 0 | 816.1662 | 816.1661 | 0.0001 |
| 20 | 6 | 15 | 1 | 19 | 6 | 14 | 0 | 816.1780 | 816.1776 | 0.0004 |
| 20 | 5 | 15 | 1 | 19 | 5 | 14 | 0 | 816.1780 | 816.1776 | 0.0004 |
| 23 | 2 | 22 | 1 | 22 | 2 | 21 | 0 | 816.1888 | 816.1885 | 0.0003 |
| 23 | 1 | 22 | 1 | 22 | 1 | 21 | 0 | 816.1888 | 816.1885 | 0.0003 |
| 18 | 9 | 10 | 1 | 17 | 9 | 9 | 0 | 816.2480 | 816.2477 | 0.0003 |
| 18 | 8 | 10 | 1 | 17 | 8 | 9 | 0 | 816.2480 | 816.2477 | 0.0003 |
| 21 | 5 | 17 | 1 | 20 | 5 | 16 | 0 | 816.2598 | 816.2595 | 0.0003 |
| 21 | 4 | 17 | 1 | 20 | 4 | 16 | 0 | 816.2598 | 816.2595 | 0.0003 |
| 24 | 1 | 24 | 1 | 23 | 1 | 23 | 0 | 816.2695 | 816.2694 | 0.0001 |
| 24 | 0 | 24 | 1 | 23 | 0 | 23 | 0 | 816.2695 | 816.2694 | 0.0001 |
| 19 | 7 | 12 | 1 | 18 | 7 | 11 | 0 | 816.3298 | 816.3298 | 0.0000 |
| 19 | 8 | 12 | 1 | 18 | 8 | 11 | 0 | 816.3298 | 816.3298 | 0.0000 |
| 22 | 4 | 19 | 1 | 21 | 4 | 18 | 0 | 816.3416 | 816.3410 | 0.0006 |
| 22 | 3 | 19 | 1 | 21 | 3 | 18 | 0 | 816.3416 | 816.3410 | 0.0006 |
| 17 | 11 | 7 | 1 | 16 | 11 | 6 | 0 | 816.4030 | 816.4030 | 0.0000 |
| 17 | 10 | 7 | 1 | 16 | 10 | 6 | 0 | 816.4030 | 816.4032 | -0.0002 |
| 20 | 6 | 14 | 1 | 19 | 6 | 13 | 0 | 816.4116 | 816.4117 | -0.0001 |
| 20 | 7 | 14 | 1 | 19 | 7 | 13 | 0 | 816.4116 | 816.4117 | -0.0001 |
| 23 | 3 | 21 | 1 | 22 | 3 | 20 | 0 | 816.4223 | 816.4221 | 0.0002 |
| 23 | 2 | 21 | 1 | 22 | 2 | 20 | 0 | 816.4223 | 816.4221 | 0.0002 |
| 18 | 10 | 9 | 1 | 17 | 10 | 8 | 0 | 816.4826 | 816.4830 | -0.0004 |
| 18 | 9 | 9 | 1 | 17 | 9 | 8 | 0 | 816.4826 | 816.4830 | -0.0004 |
| 21 | 6 | 16 | 1 | 20 | 6 | 15 | 0 | 816.4934 | 816.4934 | 0.0000 |
| 21 | 5 | 16 | 1 | 20 | 5 | 15 | 0 | 816.4934 | 816.4934 | 0.0000 |
| 24 | 2 | 23 | 1 | 23 | 2 | 22 | 0 | 816.5030 | 816.5027 | 0.0003 |
| 24 | 1 | 23 | 1 | 23 | 1 | 22 | 0 | 816.5030 | 816.5027 | 0.0003 |
| 19 | 8 | 11 | 1 | 18 | 8 | 10 | 0 | 816.5644 | 816.5644 | 0.0000 |
| 19 | 9 | 11 | 1 | 18 | 9 | 10 | 0 | 816.5644 | 816.5644 | 0.0000 |
| 22 | 5 | 18 | 1 | 21 | 5 | 17 | 0 | 816.5751 | 816.5747 | 0.0004 |
| 22 | 4 | 18 | 1 | 21 | 4 | 17 | 0 | 816.5751 | 816.5747 | 0.0004 |
| 25 | 1 | 25 | 1 | 24 | 1 | 24 | 0 | 816.5827 | 816.5830 | -0.0003 |
| 25 | 0 | 25 | 1 | 24 | 0 | 24 | 0 | 816.5827 | 816.5830 | -0.0003 |
| 20 | 7 | 13 | 1 | 19 | 7 | 12 | 0 | 816.6462 | 816.6460 | 0.0002 |
| 20 | 8 | 13 | 1 | 19 | 8 | 12 | 0 | 816.6462 | 816.6460 | 0.0002 |
| 23 | 4 | 20 | 1 | 22 | 4 | 19 | 0 | 816.6559 | 816.6557 | 0.0002 |
| 23 | 3 | 20 | 1 | 22 | 3 | 19 | 0 | 816.6559 | 816.6557 | 0.0002 |
| 18 | 11 | 8 | 1 | 17 | 11 | 7 | 0 | 816.7193 | 816.7190 | 0.0003 |
| 18 | 10 | 8 | 1 | 17 | 10 | 7 | 0 | 816.7193 | 816.7190 | 0.0003 |
| 21 | 6 | 15 | 1 | 20 | 6 | 14 | 0 | 816.7280 | 816.7275 | 0.0005 |
| 21 | 7 | 15 | 1 | 20 | 7 | 14 | 0 | 816.7280 | 816.7275 | 0.0005 |
| 24 | 3 | 22 | 1 | 23 | 3 | 21 | 0 | 816.7366 | 816.7362 | 0.0004 |
| 24 | 2 | 22 | 1 | 23 | 2 | 21 | 0 | 816.7366 | 816.7362 | 0.0004 |
| 19 | 9 | 10 | 1 | 18 | 9 | 9 | 0 | 816.7990 | 816.7993 | -0.0003 |
| 19 | 10 | 10 | 1 | 18 | 10 | 9 | 0 | 816.7990 | 816.7993 | -0.0003 |
| 22 | 6 | 17 | 1 | 21 | 6 | 16 | 0 | 816.8087 | 816.8086 | 0.0001 |
| 22 | 5 | 17 | 1 | 21 | 5 | 16 | 0 | 816.8087 | 816.8086 | 0.0001 |
| 25 | 1 | 24 | 1 | 24 | 1 | 23 | 0 | 816.8162 | 816.8163 | -0.0001 |
| 25 | 2 | 24 | 1 | 24 | 2 | 23 | 0 | 816.8162 | 816.8163 | -0.0001 |
| 20 | 8 | 12 | 1 | 19 | 8 | 11 | 0 | 816.8808 | 816.8805 | 0.0003 |
| 20 | 9 | 12 | 1 | 19 | 9 | 11 | 0 | 816.8808 | 816.8805 | 0.0003 |
| 23 | 5 | 19 | 1 | 22 | 5 | 18 | 0 | 816.8894 | 816.8893 | 0.0001 |
| 23 | 4 | 19 | 1 | 22 | 4 | 18 | 0 | 816.8894 | 816.8893 | 0.0001 |
| 26 | 1 | 26 | 1 | 25 | 1 | 25 | 0 | 816.8958 | 816.8960 | -0.0002 |
| 26 | 0 | 26 | 1 | 25 | 0 | 25 | 0 | 816.8958 | 816.8960 | -0.0002 |
| 18 | 12 | 7 | 1 | 17 | 12 | 6 | 0 | 816.9561 | 816.9565 | -0.0004 |
| 18 | 11 | 7 | 1 | 17 | 11 | 6 | 0 | 816.9561 | 816.9569 | -0.0008 |
| 21 | 7 | 14 | 1 | 20 | 7 | 13 | 0 | 816.9615 | 816.9616 | -0.0001 |
| 21 | 8 | 14 | 1 | 20 | 8 | 13 | 0 | 816.9615 | 816.9616 | -0.0001 |
| 24 | 4 | 21 | 1 | 23 | 4 | 20 | 0 | 816.9701 | 816.9697 | 0.0004 |
| 24 | 3 | 21 | 1 | 23 | 3 | 20 | 0 | 816.9701 | 816.9697 | 0.0004 |
| 19 | 11 | 9 | 1 | 18 | 11 | 8 | 0 | 817.0347 | 817.0348 | -0.0001 |
| 19 | 10 | 9 | 1 | 18 | 10 | 8 | 0 | 817.0347 | 817.0348 | -0.0001 |
| 22 | 6 | 16 | 1 | 21 | 6 | 15 | 0 | 817.0433 | 817.0425 | 0.0008 |
| 22 | 7 | 16 | 1 | 21 | 7 | 15 | 0 | 817.0433 | 817.0425 | 0.0008 |
| 25 | 2 | 23 | 1 | 24 | 2 | 22 | 0 | 817.0497 | 817.0496 | 0.0001 |
| 25 | 3 | 23 | 1 | 24 | 3 | 22 | 0 | 817.0497 | 817.0496 | 0.0001 |
| 20 | 9 | 11 | 1 | 19 | 9 | 10 | 0 | 817.1154 | 817.1151 | 0.0003 |
| 20 | 10 | 11 | 1 | 19 | 10 | 10 | 0 | 817.1154 | 817.1151 | 0.0003 |
| 23 | 5 | 18 | 1 | 22 | 5 | 17 | 0 | 817.1229 | 817.1231 | -0.0002 |
| 23 | 6 | 18 | 1 | 22 | 6 | 17 | 0 | 817.1229 | 817.1231 | -0.0002 |
| 26 | 1 | 25 | 1 | 25 | 1 | 24 | 0 | 817.1294 | 817.1292 | 0.0002 |
| 26 | 2 | 25 | 1 | 25 | 2 | 24 | 0 | 817.1294 | 817.1292 | 0.0002 |
| 21 | 8 | 13 | 1 | 20 | 8 | 12 | 0 | 817.1961 | 817.1959 | 0.0002 |
| 21 | 9 | 13 | 1 | 20 | 9 | 12 | 0 | 817.1961 | 817.1959 | 0.0002 |
| 24 | 4 | 20 | 1 | 23 | 4 | 19 | 0 | 817.2036 | 817.2032 | 0.0004 |
| 24 | 5 | 20 | 1 | 23 | 5 | 19 | 0 | 817.2036 | 817.2032 | 0.0004 |
| 27 | 0 | 27 | 1 | 26 | 0 | 26 | 0 | 817.2079 | 817.2083 | -0.0004 |
| 27 | 1 | 27 | 1 | 26 | 1 | 26 | 0 | 817.2079 | 817.2083 | -0.0004 |
| 19 | 12 | 8 | 1 | 18 | 12 | 7 | 0 | 817.2714 | 817.2713 | 0.0001 |
| 19 | 11 | 8 | 1 | 18 | 11 | 7 | 0 | 817.2714 | 817.2713 | 0.0001 |
| 22 | 7 | 15 | 1 | 21 | 7 | 14 | 0 | 817.2768 | 817.2765 | 0.0003 |
| 22 | 8 | 15 | 1 | 21 | 8 | 14 | 0 | 817.2768 | 817.2765 | 0.0003 |
| 25 | 3 | 22 | 1 | 24 | 3 | 21 | 0 | 817.2833 | 817.2830 | 0.0003 |
| 25 | 4 | 22 | 1 | 24 | 4 | 21 | 0 | 817.2833 | 817.2830 | 0.0003 |
| 20 | 11 | 10 | 1 | 19 | 11 | 9 | 0 | 817.3500 | 817.3502 | -0.0002 |
| 20 | 10 | 10 | 1 | 19 | 10 | 9 | 0 | 817.3500 | 817.3502 | -0.0002 |
| 23 | 6 | 17 | 1 | 22 | 6 | 16 | 0 | 817.3575 | 817.3569 | 0.0006 |
| 23 | 7 | 17 | 1 | 22 | 7 | 16 | 0 | 817.3575 | 817.3569 | 0.0006 |
| 26 | 2 | 24 | 1 | 25 | 2 | 23 | 0 | 817.3629 | 817.3624 | 0.0005 |
| 26 | 3 | 24 | 1 | 25 | 3 | 23 | 0 | 817.3629 | 817.3624 | 0.0005 |
| 21 | 9 | 12 | 1 | 20 | 9 | 11 | 0 | 817.4307 | 817.4304 | 0.0003 |
| 21 | 10 | 12 | 1 | 20 | 10 | 11 | 0 | 817.4307 | 817.4304 | 0.0003 |
| 24 | 5 | 19 | 1 | 23 | 5 | 18 | 0 | 817.4371 | 817.4369 | 0.0002 |
| 24 | 6 | 19 | 1 | 23 | 6 | 18 | 0 | 817.4371 | 817.4369 | 0.0002 |
| 27 | 1 | 26 | 1 | 26 | 1 | 25 | 0 | 817.4414 | 817.4413 | 0.0001 |
| 27 | 2 | 26 | 1 | 26 | 2 | 25 | 0 | 817.4414 | 817.4413 | 0.0001 |
| 19 | 13 | 7 | 1 | 18 | 13 | 6 | 0 | 817.5103 | 817.5095 | 0.0008 |
| 19 | 12 | 7 | 1 | 18 | 12 | 6 | 0 | 817.5103 | 817.5103 | 0.0000 |
| 22 | 8 | 14 | 1 | 21 | 8 | 13 | 0 | 817.5103 | 817.5107 | -0.0004 |
| 22 | 9 | 14 | 1 | 21 | 9 | 13 | 0 | 817.5103 | 817.5107 | -0.0004 |
| 25 | 4 | 21 | 1 | 24 | 4 | 20 | 0 | 817.5168 | 817.5165 | 0.0003 |
| 25 | 5 | 21 | 1 | 24 | 5 | 20 | 0 | 817.5168 | 817.5165 | 0.0003 |
| 28 | 0 | 28 | 1 | 27 | 0 | 27 | 0 | 817.5200 | 817.5199 | 0.0001 |
| 28 | 1 | 28 | 1 | 27 | 1 | 27 | 0 | 817.5200 | 817.5199 | 0.0001 |
| 20 | 12 | 9 | 1 | 19 | 12 | 8 | 0 | 817.5857 | 817.5860 | -0.0003 |
| 20 | 11 | 9 | 1 | 19 | 11 | 8 | 0 | 817.5857 | 817.5860 | -0.0003 |
| 23 | 7 | 16 | 1 | 22 | 7 | 15 | 0 | 817.5910 | 817.5908 | 0.0002 |
| 23 | 8 | 16 | 1 | 22 | 8 | 15 | 0 | 817.5910 | 817.5908 | 0.0002 |
| 26 | 3 | 23 | 1 | 25 | 3 | 22 | 0 | 817.5964 | 817.5957 | 0.0007 |
| 26 | 4 | 23 | 1 | 25 | 4 | 22 | 0 | 817.5964 | 817.5957 | 0.0007 |
| 21 | 10 | 11 | 1 | 20 | 10 | 10 | 0 | 817.6653 | 817.6651 | 0.0002 |
| 21 | 11 | 11 | 1 | 20 | 11 | 10 | 0 | 817.6653 | 817.6651 | 0.0002 |
| 24 | 6 | 18 | 1 | 23 | 6 | 17 | 0 | 817.6707 | 817.6705 | 0.0002 |
| 24 | 7 | 18 | 1 | 23 | 7 | 17 | 0 | 817.6707 | 817.6705 | 0.0002 |
| 27 | 2 | 25 | 1 | 26 | 2 | 24 | 0 | 817.6750 | 817.6745 | 0.0005 |
| 27 | 3 | 25 | 1 | 26 | 3 | 24 | 0 | 817.6750 | 817.6745 | 0.0005 |
| 22 | 9 | 13 | 1 | 21 | 9 | 12 | 0 | 817.7449 | 817.7449 | 0.0000 |
| 22 | 10 | 13 | 1 | 21 | 10 | 12 | 0 | 817.7449 | 817.7449 | 0.0000 |
| 25 | 5 | 20 | 1 | 24 | 5 | 19 | 0 | 817.7503 | 817.7500 | 0.0003 |
| 25 | 6 | 20 | 1 | 24 | 6 | 19 | 0 | 817.7503 | 817.7500 | 0.0003 |
| 28 | 1 | 27 | 1 | 27 | 1 | 26 | 0 | 817.7535 | 817.7529 | 0.0006 |
| 28 | 2 | 27 | 1 | 27 | 2 | 26 | 0 | 817.7535 | 817.7529 | 0.0006 |
| 19 | 13 | 6 | 1 | 18 | 13 | 5 | 0 | 817.7589 | 817.7593 | -0.0004 |
| 18 | 14 | 4 | 1 | 17 | 14 | 3 | 0 | 817.8041 | 817.8041 | 0.0000 |
| 20 | 13 | 8 | 1 | 19 | 13 | 7 | 0 | 817.8246 | 817.8230 | 0.0016 |
| 20 | 12 | 8 | 1 | 19 | 12 | 7 | 0 | 817.8246 | 817.8230 | 0.0016 |
| 23 | 8 | 15 | 1 | 22 | 8 | 14 | 0 | 817.8246 | 817.8248 | -0.0002 |
| 23 | 9 | 15 | 1 | 22 | 9 | 14 | 0 | 817.8246 | 817.8248 | -0.0002 |
| 26 | 5 | 22 | 1 | 25 | 5 | 21 | 0 | 817.8299 | 817.8290 | 0.0009 |
| 26 | 4 | 22 | 1 | 25 | 4 | 21 | 0 | 817.8299 | 817.8290 | 0.0009 |
| 29 | 0 | 29 | 1 | 28 | 0 | 28 | 0 | 817.8299 | 817.8309 | -0.0010 |
| 29 | 1 | 29 | 1 | 28 | 1 | 28 | 0 | 817.8299 | 817.8309 | -0.0010 |
| 21 | 12 | 10 | 1 | 20 | 12 | 9 | 0 | 817.9010 | 817.9004 | 0.0006 |
| 21 | 11 | 10 | 1 | 20 | 11 | 9 | 0 | 817.9010 | 817.9004 | 0.0006 |
| 24 | 7 | 17 | 1 | 23 | 7 | 16 | 0 | 817.9042 | 817.9043 | -0.0001 |
| 24 | 8 | 17 | 1 | 23 | 8 | 16 | 0 | 817.9042 | 817.9043 | -0.0001 |
| 27 | 3 | 24 | 1 | 26 | 3 | 23 | 0 | 817.9085 | 817.9076 | 0.0009 |
| 27 | 4 | 24 | 1 | 26 | 4 | 23 | 0 | 817.9085 | 817.9076 | 0.0009 |
| 22 | 10 | 12 | 1 | 21 | 10 | 11 | 0 | 817.9795 | 817.9795 | 0.0000 |
| 22 | 11 | 12 | 1 | 21 | 11 | 11 | 0 | 817.9795 | 817.9795 | 0.0000 |
| 25 | 6 | 19 | 1 | 24 | 6 | 18 | 0 | 817.9838 | 817.9836 | 0.0002 |
| 25 | 7 | 19 | 1 | 24 | 7 | 18 | 0 | 817.9838 | 817.9836 | 0.0002 |
| 28 | 2 | 26 | 1 | 27 | 2 | 25 | 0 | 817.9860 | 817.9859 | 0.0001 |
| 28 | 3 | 26 | 1 | 27 | 3 | 25 | 0 | 817.9860 | 817.9859 | 0.0001 |
| 23 | 9 | 14 | 1 | 22 | 9 | 13 | 0 | 818.0592 | 818.0589 | 0.0003 |
| 23 | 10 | 14 | 1 | 22 | 10 | 13 | 0 | 818.0592 | 818.0589 | 0.0003 |
| 26 | 6 | 21 | 1 | 25 | 6 | 20 | 0 | 818.0635 | 818.0624 | 0.0011 |
| 26 | 5 | 21 | 1 | 25 | 5 | 20 | 0 | 818.0635 | 818.0624 | 0.0011 |
| 20 | 13 | 7 | 1 | 19 | 13 | 6 | 0 | 818.0635 | 818.0635 | 0.0000 |
| 29 | 1 | 28 | 1 | 28 | 1 | 27 | 0 | 818.0635 | 818.0637 | -0.0002 |
| 29 | 2 | 28 | 1 | 28 | 2 | 27 | 0 | 818.0635 | 818.0637 | -0.0002 |
| 21 | 13 | 9 | 1 | 20 | 13 | 8 | 0 | 818.1377 | 818.1365 | 0.0012 |
| 21 | 12 | 9 | 1 | 20 | 12 | 8 | 0 | 818.1377 | 818.1365 | 0.0012 |
| 24 | 8 | 16 | 1 | 23 | 8 | 15 | 0 | 818.1377 | 818.1382 | -0.0005 |
| 24 | 9 | 16 | 1 | 23 | 9 | 15 | 0 | 818.1377 | 818.1382 | -0.0005 |
| 27 | 4 | 23 | 1 | 26 | 4 | 22 | 0 | 818.1409 | 818.1409 | 0.0000 |
| 27 | 5 | 23 | 1 | 26 | 5 | 22 | 0 | 818.1409 | 818.1409 | 0.0000 |
| 30 | 0 | 30 | 1 | 29 | 0 | 29 | 0 | 818.1409 | 818.1411 | -0.0002 |
| 30 | 1 | 30 | 1 | 29 | 1 | 29 | 0 | 818.1409 | 818.1411 | -0.0002 |
| 22 | 12 | 11 | 1 | 21 | 12 | 10 | 0 | 818.2141 | 818.2144 | -0.0003 |
| 22 | 11 | 11 | 1 | 21 | 11 | 10 | 0 | 818.2141 | 818.2144 | -0.0003 |
| 25 | 7 | 18 | 1 | 24 | 7 | 17 | 0 | 818.2184 | 818.2172 | 0.0012 |
| 25 | 8 | 18 | 1 | 24 | 8 | 17 | 0 | 818.2184 | 818.2172 | 0.0012 |
| 28 | 3 | 25 | 1 | 27 | 3 | 24 | 0 | 818.2184 | 818.2189 | -0.0005 |
| 28 | 4 | 25 | 1 | 27 | 4 | 24 | 0 | 818.2184 | 818.2189 | -0.0005 |
| 26 | 6 | 20 | 1 | 25 | 6 | 19 | 0 | 818.2970 | 818.2959 | 0.0011 |
| 26 | 7 | 20 | 1 | 25 | 7 | 19 | 0 | 818.2970 | 818.2959 | 0.0011 |
| 29 | 2 | 27 | 1 | 28 | 2 | 26 | 0 | 818.2970 | 818.2966 | 0.0004 |
| 29 | 3 | 27 | 1 | 28 | 3 | 26 | 0 | 818.2970 | 818.2966 | 0.0004 |
| 24 | 9 | 15 | 1 | 23 | 9 | 14 | 0 | 818.3745 | 818.3722 | 0.0023 |
| 24 | 10 | 15 | 1 | 23 | 10 | 14 | 0 | 818.3745 | 818.3722 | 0.0023 |
| 30 | 1 | 29 | 1 | 29 | 1 | 28 | 0 | 818.3745 | 818.3739 | 0.0006 |
| 30 | 2 | 29 | 1 | 29 | 2 | 28 | 0 | 818.3745 | 818.3739 | 0.0006 |
| 21 | 14 | 8 | 1 | 20 | 14 | 7 | 0 | 818.3745 | 818.3741 | 0.0004 |
| 27 | 6 | 22 | 1 | 26 | 6 | 21 | 0 | 818.3745 | 818.3742 | 0.0003 |
| 27 | 5 | 22 | 1 | 26 | 5 | 21 | 0 | 818.3745 | 818.3742 | 0.0003 |
| 21 | 13 | 8 | 1 | 20 | 13 | 7 | 0 | 818.3745 | 818.3742 | 0.0003 |
| 22 | 13 | 10 | 1 | 21 | 13 | 9 | 0 | 818.4509 | 818.4498 | 0.0011 |
| 22 | 12 | 10 | 1 | 21 | 12 | 9 | 0 | 818.4509 | 818.4498 | 0.0011 |
| 31 | 0 | 31 | 1 | 30 | 0 | 30 | 0 | 818.4509 | 818.4507 | 0.0002 |
| 31 | 1 | 31 | 1 | 30 | 1 | 30 | 0 | 818.4509 | 818.4507 | 0.0002 |
| 25 | 8 | 17 | 1 | 24 | 8 | 16 | 0 | 818.4509 | 818.4509 | 0.0000 |
| 25 | 9 | 17 | 1 | 24 | 9 | 16 | 0 | 818.4509 | 818.4509 | 0.0000 |
| 28 | 4 | 24 | 1 | 27 | 4 | 23 | 0 | 818.4509 | 818.4521 | -0.0012 |
| 28 | 5 | 24 | 1 | 27 | 5 | 23 | 0 | 818.4509 | 818.4521 | -0.0012 |
| 23 | 12 | 12 | 1 | 22 | 12 | 11 | 0 | 818.5294 | 818.5278 | 0.0016 |
| 23 | 11 | 12 | 1 | 22 | 11 | 11 | 0 | 818.5294 | 818.5278 | 0.0016 |
| 26 | 7 | 19 | 1 | 25 | 7 | 18 | 0 | 818.5294 | 818.5294 | 0.0000 |
| 26 | 8 | 19 | 1 | 25 | 8 | 18 | 0 | 818.5294 | 818.5294 | 0.0000 |
| 29 | 3 | 26 | 1 | 28 | 3 | 25 | 0 | 818.5294 | 818.5296 | -0.0002 |
| 29 | 4 | 26 | 1 | 28 | 4 | 25 | 0 | 818.5294 | 818.5296 | -0.0002 |
| 24 | 10 | 14 | 1 | 23 | 10 | 13 | 0 | 818.6069 | 818.6063 | 0.0006 |
| 24 | 11 | 14 | 1 | 23 | 11 | 13 | 0 | 818.6069 | 818.6063 | 0.0006 |
| 30 | 2 | 28 | 1 | 29 | 2 | 27 | 0 | 818.6069 | 818.6066 | 0.0003 |
| 30 | 3 | 28 | 1 | 29 | 3 | 27 | 0 | 818.6069 | 818.6066 | 0.0003 |
| 27 | 6 | 21 | 1 | 26 | 6 | 20 | 0 | 818.6069 | 818.6075 | -0.0006 |
| 27 | 7 | 21 | 1 | 26 | 7 | 20 | 0 | 818.6069 | 818.6075 | -0.0006 |
| 31 | 1 | 30 | 1 | 30 | 1 | 29 | 0 | 818.6855 | 818.6833 | 0.0022 |
| 31 | 2 | 30 | 1 | 30 | 2 | 29 | 0 | 818.6855 | 818.6833 | 0.0022 |
| 25 | 9 | 16 | 1 | 24 | 9 | 15 | 0 | 818.6855 | 818.6848 | 0.0007 |
| 25 | 10 | 16 | 1 | 24 | 10 | 15 | 0 | 818.6855 | 818.6848 | 0.0007 |
| 28 | 6 | 23 | 1 | 27 | 6 | 22 | 0 | 818.6855 | 818.6852 | 0.0003 |
| 28 | 5 | 23 | 1 | 27 | 5 | 22 | 0 | 818.6855 | 818.6852 | 0.0003 |
| 22 | 14 | 9 | 1 | 21 | 14 | 8 | 0 | 818.6855 | 818.6863 | -0.0008 |
| 22 | 13 | 9 | 1 | 21 | 13 | 8 | 0 | 818.6855 | 818.6863 | -0.0008 |
| 32 | 0 | 32 | 1 | 31 | 0 | 31 | 0 | 818.7597 | 818.7596 | 0.0001 |
| 32 | 1 | 32 | 1 | 31 | 1 | 31 | 0 | 818.7597 | 818.7596 | 0.0001 |
| 29 | 5 | 25 | 1 | 28 | 5 | 24 | 0 | 818.7630 | 818.7626 | 0.0004 |
| 29 | 4 | 25 | 1 | 28 | 4 | 24 | 0 | 818.7630 | 818.7626 | 0.0004 |
| 23 | 13 | 11 | 1 | 22 | 13 | 10 | 0 | 818.7630 | 818.7628 | 0.0002 |
| 23 | 12 | 11 | 1 | 22 | 12 | 10 | 0 | 818.7630 | 818.7628 | 0.0002 |
| 26 | 8 | 18 | 1 | 25 | 8 | 17 | 0 | 818.7630 | 818.7630 | 0.0000 |
| 26 | 9 | 18 | 1 | 25 | 9 | 17 | 0 | 818.7630 | 818.7630 | 0.0000 |
| 30 | 3 | 27 | 1 | 29 | 3 | 26 | 0 | 818.8404 | 818.8395 | 0.0009 |
| 30 | 4 | 27 | 1 | 29 | 4 | 26 | 0 | 818.8404 | 818.8395 | 0.0009 |
| 24 | 12 | 13 | 1 | 23 | 12 | 12 | 0 | 818.8404 | 818.8407 | -0.0003 |
| 24 | 11 | 13 | 1 | 23 | 11 | 12 | 0 | 818.8404 | 818.8407 | -0.0003 |
| 27 | 7 | 20 | 1 | 26 | 7 | 19 | 0 | 818.8404 | 818.8409 | -0.0005 |
| 27 | 8 | 20 | 1 | 26 | 8 | 19 | 0 | 818.8404 | 818.8409 | -0.0005 |
| 31 | 2 | 29 | 1 | 30 | 2 | 28 | 0 | 818.9190 | 818.9160 | 0.0030 |
| 31 | 3 | 29 | 1 | 30 | 3 | 28 | 0 | 818.9190 | 818.9160 | 0.0030 |
| 28 | 6 | 22 | 1 | 27 | 6 | 21 | 0 | 818.9190 | 818.9185 | 0.0005 |
| 28 | 7 | 22 | 1 | 27 | 7 | 21 | 0 | 818.9190 | 818.9185 | 0.0005 |
| 25 | 10 | 15 | 1 | 24 | 10 | 14 | 0 | 818.9190 | 818.9188 | 0.0002 |
| 25 | 11 | 15 | 1 | 24 | 11 | 14 | 0 | 818.9190 | 818.9188 | 0.0002 |
| 22 | 14 | 8 | 1 | 21 | 14 | 7 | 0 | 818.9244 | 818.9249 | -0.0005 |
| 32 | 1 | 31 | 1 | 31 | 1 | 30 | 0 | 818.9922 | 818.9921 | 0.0001 |
| 32 | 2 | 31 | 1 | 31 | 2 | 30 | 0 | 818.9922 | 818.9921 | 0.0001 |
| 29 | 6 | 24 | 1 | 28 | 6 | 23 | 0 | 818.9965 | 818.9956 | 0.0009 |
| 29 | 5 | 24 | 1 | 28 | 5 | 23 | 0 | 818.9965 | 818.9956 | 0.0009 |
| 26 | 9 | 17 | 1 | 25 | 9 | 16 | 0 | 818.9965 | 818.9967 | -0.0002 |
| 26 | 10 | 17 | 1 | 25 | 10 | 16 | 0 | 818.9965 | 818.9967 | -0.0002 |
| 23 | 14 | 10 | 1 | 22 | 14 | 9 | 0 | 818.9965 | 818.9986 | -0.0021 |
| 23 | 13 | 10 | 1 | 22 | 13 | 9 | 0 | 818.9965 | 818.9986 | -0.0021 |
| 33 | 0 | 33 | 1 | 32 | 0 | 32 | 0 | 819.0686 | 819.0679 | 0.0007 |
| 33 | 1 | 33 | 1 | 32 | 1 | 32 | 0 | 819.0686 | 819.0679 | 0.0007 |
| 30 | 5 | 26 | 1 | 29 | 5 | 25 | 0 | 819.0686 | 819.0724 | -0.0038 |
| 30 | 4 | 26 | 1 | 29 | 4 | 25 | 0 | 819.0686 | 819.0724 | -0.0038 |
| 27 | 8 | 19 | 1 | 26 | 8 | 18 | 0 | 819.0750 | 819.0744 | 0.0006 |
| 27 | 9 | 19 | 1 | 26 | 9 | 18 | 0 | 819.0750 | 819.0744 | 0.0006 |
| 24 | 13 | 12 | 1 | 23 | 13 | 11 | 0 | 819.0750 | 819.0754 | -0.0004 |
| 24 | 12 | 12 | 1 | 23 | 12 | 11 | 0 | 819.0750 | 819.0754 | -0.0004 |
| 31 | 3 | 28 | 1 | 30 | 3 | 27 | 0 | 819.1493 | 819.1487 | 0.0006 |
| 31 | 4 | 28 | 1 | 30 | 4 | 27 | 0 | 819.1493 | 819.1487 | 0.0006 |
| 28 | 7 | 21 | 1 | 27 | 7 | 20 | 0 | 819.1493 | 819.1518 | -0.0025 |
| 28 | 8 | 21 | 1 | 27 | 8 | 20 | 0 | 819.1493 | 819.1518 | -0.0025 |
| 25 | 12 | 14 | 1 | 24 | 12 | 13 | 0 | 819.1525 | 819.1529 | -0.0004 |
| 25 | 11 | 14 | 1 | 24 | 11 | 13 | 0 | 819.1525 | 819.1529 | -0.0004 |
| 32 | 2 | 30 | 1 | 31 | 2 | 29 | 0 | 819.2246 | 819.2247 | -0.0001 |
| 32 | 3 | 30 | 1 | 31 | 3 | 29 | 0 | 819.2246 | 819.2247 | -0.0001 |
| 29 | 6 | 23 | 1 | 28 | 6 | 22 | 0 | 819.2289 | 819.2288 | 0.0001 |
| 29 | 7 | 23 | 1 | 28 | 7 | 22 | 0 | 819.2289 | 819.2288 | 0.0001 |
| 26 | 10 | 16 | 1 | 25 | 10 | 15 | 0 | 819.2289 | 819.2306 | -0.0017 |
| 26 | 11 | 16 | 1 | 25 | 11 | 15 | 0 | 819.2289 | 819.2306 | -0.0017 |
| 23 | 14 | 9 | 1 | 22 | 14 | 8 | 0 | 819.2354 | 819.2355 | -0.0001 |
| 33 | 1 | 32 | 1 | 32 | 1 | 31 | 0 | 819.3010 | 819.3002 | 0.0008 |
| 33 | 2 | 32 | 1 | 32 | 2 | 31 | 0 | 819.3010 | 819.3002 | 0.0008 |
| 30 | 6 | 25 | 1 | 29 | 6 | 24 | 0 | 819.3053 | 819.3053 | 0.0000 |
| 30 | 5 | 25 | 1 | 29 | 5 | 24 | 0 | 819.3053 | 819.3053 | 0.0000 |
| 27 | 9 | 18 | 1 | 26 | 9 | 17 | 0 | 819.3086 | 819.3080 | 0.0006 |
| 27 | 10 | 18 | 1 | 26 | 10 | 17 | 0 | 819.3086 | 819.3080 | 0.0006 |
| 24 | 14 | 11 | 1 | 23 | 14 | 10 | 0 | 819.3107 | 819.3106 | 0.0001 |
| 24 | 13 | 11 | 1 | 23 | 13 | 10 | 0 | 819.3107 | 819.3106 | 0.0001 |
| 34 | 0 | 34 | 1 | 33 | 0 | 33 | 0 | 819.3764 | 819.3754 | 0.0010 |
| 34 | 1 | 34 | 1 | 33 | 1 | 33 | 0 | 819.3764 | 819.3754 | 0.0010 |
| 31 | 5 | 27 | 1 | 30 | 5 | 26 | 0 | 819.3818 | 819.3815 | 0.0003 |
| 31 | 4 | 27 | 1 | 30 | 4 | 26 | 0 | 819.3818 | 819.3815 | 0.0003 |
| 28 | 8 | 20 | 1 | 27 | 8 | 19 | 0 | 819.3871 | 819.3852 | 0.0019 |
| 28 | 9 | 20 | 1 | 27 | 9 | 19 | 0 | 819.3871 | 819.3852 | 0.0019 |
| 25 | 13 | 13 | 1 | 24 | 13 | 12 | 0 | 819.3871 | 819.3873 | -0.0002 |
| 25 | 12 | 13 | 1 | 24 | 12 | 12 | 0 | 819.3871 | 819.3873 | -0.0002 |
| 32 | 3 | 29 | 1 | 31 | 3 | 28 | 0 | 819.4582 | 819.4573 | 0.0009 |
| 32 | 4 | 29 | 1 | 31 | 4 | 28 | 0 | 819.4582 | 819.4573 | 0.0009 |
| 29 | 7 | 22 | 1 | 28 | 7 | 21 | 0 | 819.4614 | 819.4619 | -0.0005 |
| 29 | 8 | 22 | 1 | 28 | 8 | 21 | 0 | 819.4614 | 819.4619 | -0.0005 |
| 26 | 12 | 15 | 1 | 25 | 12 | 14 | 0 | 819.4646 | 819.4645 | 0.0001 |
| 26 | 11 | 15 | 1 | 25 | 11 | 14 | 0 | 819.4646 | 819.4645 | 0.0001 |
| 33 | 2 | 31 | 1 | 32 | 2 | 30 | 0 | 819.5335 | 819.5327 | 0.0008 |
| 33 | 3 | 31 | 1 | 32 | 3 | 30 | 0 | 819.5335 | 819.5327 | 0.0008 |
| 30 | 6 | 24 | 1 | 29 | 6 | 23 | 0 | 819.5389 | 819.5383 | 0.0006 |
| 30 | 7 | 24 | 1 | 29 | 7 | 23 | 0 | 819.5389 | 819.5383 | 0.0006 |
| 27 | 10 | 17 | 1 | 26 | 10 | 16 | 0 | 819.5421 | 819.5417 | 0.0004 |
| 27 | 11 | 17 | 1 | 26 | 11 | 16 | 0 | 819.5421 | 819.5417 | 0.0004 |
| 24 | 14 | 10 | 1 | 23 | 14 | 9 | 0 | 819.5464 | 819.5466 | -0.0002 |
| 34 | 1 | 33 | 1 | 33 | 1 | 32 | 0 | 819.6077 | 819.6077 | 0.0000 |
| 34 | 2 | 33 | 1 | 33 | 2 | 32 | 0 | 819.6077 | 819.6077 | 0.0000 |
| 31 | 6 | 26 | 1 | 30 | 6 | 25 | 0 | 819.6142 | 819.6144 | -0.0002 |
| 31 | 5 | 26 | 1 | 30 | 5 | 25 | 0 | 819.6142 | 819.6144 | -0.0002 |
| 28 | 9 | 19 | 1 | 27 | 9 | 18 | 0 | 819.6185 | 819.6186 | -0.0001 |
| 28 | 10 | 19 | 1 | 27 | 10 | 18 | 0 | 819.6185 | 819.6186 | -0.0001 |
| 25 | 14 | 12 | 1 | 24 | 14 | 11 | 0 | 819.6217 | 819.6221 | -0.0004 |
| 25 | 13 | 12 | 1 | 24 | 13 | 11 | 0 | 819.6217 | 819.6221 | -0.0004 |
| 35 | 0 | 35 | 1 | 34 | 0 | 34 | 0 | 819.6831 | 819.6823 | 0.0008 |
| 35 | 1 | 35 | 1 | 34 | 1 | 34 | 0 | 819.6831 | 819.6823 | 0.0008 |
| 32 | 5 | 28 | 1 | 31 | 5 | 27 | 0 | 819.6906 | 819.6900 | 0.0006 |
| 32 | 4 | 28 | 1 | 31 | 4 | 27 | 0 | 819.6906 | 819.6900 | 0.0006 |
| 29 | 8 | 21 | 1 | 28 | 8 | 20 | 0 | 819.6949 | 819.6952 | -0.0003 |
| 29 | 9 | 21 | 1 | 28 | 9 | 20 | 0 | 819.6949 | 819.6952 | -0.0003 |
| 26 | 13 | 14 | 1 | 25 | 13 | 13 | 0 | 819.6992 | 819.6987 | 0.0005 |
| 26 | 12 | 14 | 1 | 25 | 12 | 13 | 0 | 819.6992 | 819.6987 | 0.0005 |
| 33 | 3 | 30 | 1 | 32 | 3 | 29 | 0 | 819.7659 | 819.7652 | 0.0007 |
| 33 | 4 | 30 | 1 | 32 | 4 | 29 | 0 | 819.7659 | 819.7652 | 0.0007 |
| 30 | 7 | 23 | 1 | 29 | 7 | 22 | 0 | 819.7713 | 819.7714 | -0.0001 |
| 30 | 8 | 23 | 1 | 29 | 8 | 22 | 0 | 819.7713 | 819.7714 | -0.0001 |
| 27 | 12 | 16 | 1 | 26 | 12 | 15 | 0 | 819.7756 | 819.7755 | 0.0001 |
| 27 | 11 | 16 | 1 | 26 | 11 | 15 | 0 | 819.7756 | 819.7755 | 0.0001 |
| 34 | 2 | 32 | 1 | 33 | 2 | 31 | 0 | 819.8402 | 819.8400 | 0.0002 |
| 34 | 3 | 32 | 1 | 33 | 3 | 31 | 0 | 819.8402 | 819.8400 | 0.0002 |
| 31 | 6 | 25 | 1 | 30 | 6 | 24 | 0 | 819.8477 | 819.8473 | 0.0004 |
| 31 | 7 | 25 | 1 | 30 | 7 | 24 | 0 | 819.8477 | 819.8473 | 0.0004 |
| 28 | 10 | 18 | 1 | 27 | 10 | 17 | 0 | 819.8520 | 819.8521 | -0.0001 |
| 28 | 11 | 18 | 1 | 27 | 11 | 17 | 0 | 819.8520 | 819.8521 | -0.0001 |
| 25 | 14 | 11 | 1 | 24 | 14 | 10 | 0 | 819.8574 | 819.8575 | -0.0001 |
| 35 | 1 | 34 | 1 | 34 | 1 | 33 | 0 | 819.9155 | 819.9144 | 0.0011 |
| 35 | 2 | 34 | 1 | 34 | 2 | 33 | 0 | 819.9155 | 819.9144 | 0.0011 |
| 32 | 6 | 27 | 1 | 31 | 6 | 26 | 0 | 819.9231 | 819.9227 | 0.0004 |
| 32 | 5 | 27 | 1 | 31 | 5 | 26 | 0 | 819.9231 | 819.9227 | 0.0004 |
| 29 | 9 | 20 | 1 | 28 | 9 | 19 | 0 | 819.9284 | 819.9285 | -0.0001 |
| 29 | 10 | 20 | 1 | 28 | 10 | 19 | 0 | 819.9284 | 819.9285 | -0.0001 |
| 26 | 14 | 13 | 1 | 25 | 14 | 12 | 0 | 819.9327 | 819.9332 | -0.0005 |
| 26 | 13 | 13 | 1 | 25 | 13 | 12 | 0 | 819.9327 | 819.9332 | -0.0005 |
| 36 | 0 | 36 | 1 | 35 | 0 | 35 | 0 | 819.9887 | 819.9885 | 0.0002 |
| 36 | 1 | 36 | 1 | 35 | 1 | 35 | 0 | 819.9887 | 819.9885 | 0.0002 |
| 33 | 5 | 29 | 1 | 32 | 5 | 28 | 0 | 819.9984 | 819.9977 | 0.0007 |
| 33 | 4 | 29 | 1 | 32 | 4 | 28 | 0 | 819.9984 | 819.9977 | 0.0007 |
| 30 | 8 | 22 | 1 | 29 | 8 | 21 | 0 | 820.0048 | 820.0046 | 0.0002 |
| 30 | 9 | 22 | 1 | 29 | 9 | 21 | 0 | 820.0048 | 820.0046 | 0.0002 |
| 27 | 13 | 15 | 1 | 26 | 13 | 14 | 0 | 820.0092 | 820.0095 | -0.0003 |
| 34 | 3 | 31 | 1 | 33 | 3 | 30 | 0 | 820.0726 | 820.0724 | 0.0002 |
| 34 | 4 | 31 | 1 | 33 | 4 | 30 | 0 | 820.0726 | 820.0724 | 0.0002 |
| 31 | 7 | 24 | 1 | 30 | 7 | 23 | 0 | 820.0802 | 820.0802 | 0.0000 |
| 31 | 8 | 24 | 1 | 30 | 8 | 23 | 0 | 820.0802 | 820.0802 | 0.0000 |
| 28 | 12 | 17 | 1 | 27 | 12 | 16 | 0 | 820.0856 | 820.0858 | -0.0002 |
| 28 | 11 | 17 | 1 | 27 | 11 | 16 | 0 | 820.0856 | 820.0858 | -0.0002 |
| 35 | 2 | 33 | 1 | 34 | 2 | 32 | 0 | 820.1469 | 820.1466 | 0.0003 |
| 35 | 3 | 33 | 1 | 34 | 3 | 32 | 0 | 820.1469 | 820.1466 | 0.0003 |
| 32 | 6 | 26 | 1 | 31 | 6 | 25 | 0 | 820.1555 | 820.1555 | 0.0000 |
| 32 | 7 | 26 | 1 | 31 | 7 | 25 | 0 | 820.1555 | 820.1555 | 0.0000 |
| 29 | 10 | 19 | 1 | 28 | 10 | 18 | 0 | 820.1620 | 820.1619 | 0.0001 |
| 29 | 11 | 19 | 1 | 28 | 11 | 18 | 0 | 820.1620 | 820.1619 | 0.0001 |
| 26 | 14 | 12 | 1 | 25 | 14 | 11 | 0 | 820.1684 | 820.1681 | 0.0003 |
| 36 | 1 | 35 | 1 | 35 | 1 | 34 | 0 | 820.2212 | 820.2205 | 0.0007 |
| 36 | 2 | 35 | 1 | 35 | 2 | 34 | 0 | 820.2212 | 820.2205 | 0.0007 |
| 33 | 6 | 28 | 1 | 32 | 6 | 27 | 0 | 820.2308 | 820.2304 | 0.0004 |
| 33 | 5 | 28 | 1 | 32 | 5 | 27 | 0 | 820.2308 | 820.2304 | 0.0004 |
| 30 | 9 | 21 | 1 | 29 | 9 | 20 | 0 | 820.2373 | 820.2378 | -0.0005 |
| 30 | 10 | 21 | 1 | 29 | 10 | 20 | 0 | 820.2373 | 820.2378 | -0.0005 |
| 27 | 14 | 14 | 1 | 26 | 14 | 13 | 0 | 820.2438 | 820.2437 | 0.0001 |
| 27 | 13 | 14 | 1 | 26 | 13 | 13 | 0 | 820.2438 | 820.2437 | 0.0001 |
| 37 | 0 | 37 | 1 | 36 | 0 | 36 | 0 | 820.2911 | 820.2940 | -0.0029 |
| 37 | 1 | 37 | 1 | 36 | 1 | 36 | 0 | 820.2911 | 820.2940 | -0.0029 |
| 34 | 5 | 30 | 1 | 33 | 5 | 29 | 0 | 820.3051 | 820.3048 | 0.0003 |
| 34 | 4 | 30 | 1 | 33 | 4 | 29 | 0 | 820.3051 | 820.3048 | 0.0003 |
| 31 | 8 | 23 | 1 | 30 | 8 | 22 | 0 | 820.3137 | 820.3132 | 0.0005 |
| 31 | 9 | 23 | 1 | 30 | 9 | 22 | 0 | 820.3137 | 820.3132 | 0.0005 |
| 28 | 13 | 16 | 1 | 27 | 13 | 15 | 0 | 820.3202 | 820.3196 | 0.0006 |
| 28 | 12 | 16 | 1 | 27 | 12 | 15 | 0 | 820.3202 | 820.3196 | 0.0006 |
| 35 | 3 | 32 | 1 | 34 | 3 | 31 | 0 | 820.3793 | 820.3789 | 0.0004 |
| 35 | 4 | 32 | 1 | 34 | 4 | 31 | 0 | 820.3793 | 820.3789 | 0.0004 |
| 32 | 7 | 25 | 1 | 31 | 7 | 24 | 0 | 820.3880 | 820.3883 | -0.0003 |
| 32 | 8 | 25 | 1 | 31 | 8 | 24 | 0 | 820.3880 | 820.3883 | -0.0003 |
| 29 | 12 | 18 | 1 | 28 | 12 | 17 | 0 | 820.3955 | 820.3954 | 0.0001 |
| 29 | 11 | 18 | 1 | 28 | 11 | 17 | 0 | 820.3955 | 820.3954 | 0.0001 |
| 36 | 2 | 34 | 1 | 35 | 2 | 33 | 0 | 820.4536 | 820.4526 | 0.0010 |
| 36 | 3 | 34 | 1 | 35 | 3 | 33 | 0 | 820.4536 | 820.4526 | 0.0010 |
| 33 | 6 | 27 | 1 | 32 | 6 | 26 | 0 | 820.4633 | 820.4630 | 0.0003 |
| 33 | 7 | 27 | 1 | 32 | 7 | 26 | 0 | 820.4633 | 820.4630 | 0.0003 |
| 30 | 10 | 20 | 1 | 29 | 10 | 19 | 0 | 820.4708 | 820.4710 | -0.0002 |
| 30 | 11 | 20 | 1 | 29 | 11 | 19 | 0 | 820.4708 | 820.4710 | -0.0002 |
| 27 | 14 | 13 | 1 | 26 | 14 | 12 | 0 | 820.4784 | 820.4782 | 0.0002 |
| 37 | 1 | 36 | 1 | 36 | 1 | 35 | 0 | 820.5268 | 820.5259 | 0.0009 |
| 37 | 2 | 36 | 1 | 36 | 2 | 35 | 0 | 820.5268 | 820.5259 | 0.0009 |
| 34 | 6 | 29 | 1 | 33 | 6 | 28 | 0 | 820.5375 | 820.5373 | 0.0002 |
| 34 | 5 | 29 | 1 | 33 | 5 | 28 | 0 | 820.5375 | 820.5373 | 0.0002 |
| 31 | 9 | 22 | 1 | 30 | 9 | 21 | 0 | 820.5462 | 820.5463 | -0.0001 |
| 31 | 10 | 22 | 1 | 30 | 10 | 21 | 0 | 820.5462 | 820.5463 | -0.0001 |
| 28 | 14 | 15 | 1 | 27 | 14 | 14 | 0 | 820.5537 | 820.5536 | 0.0001 |
| 28 | 13 | 15 | 1 | 27 | 13 | 14 | 0 | 820.5537 | 820.5536 | 0.0001 |
| 38 | 0 | 38 | 1 | 37 | 0 | 37 | 0 | 820.6000 | 820.5989 | 0.0011 |
| 38 | 1 | 38 | 1 | 37 | 1 | 37 | 0 | 820.6000 | 820.5989 | 0.0011 |
| 35 | 5 | 31 | 1 | 34 | 5 | 30 | 0 | 820.6118 | 820.6112 | 0.0006 |
| 35 | 4 | 31 | 1 | 34 | 4 | 30 | 0 | 820.6118 | 820.6112 | 0.0006 |
| 32 | 8 | 24 | 1 | 31 | 8 | 23 | 0 | 820.6215 | 820.6212 | 0.0003 |
| 32 | 9 | 24 | 1 | 31 | 9 | 23 | 0 | 820.6215 | 820.6212 | 0.0003 |
| 29 | 13 | 17 | 1 | 28 | 13 | 16 | 0 | 820.6290 | 820.6291 | -0.0001 |
| 29 | 12 | 17 | 1 | 28 | 12 | 16 | 0 | 820.6290 | 820.6291 | -0.0001 |
| 36 | 3 | 33 | 1 | 35 | 3 | 32 | 0 | 820.6850 | 820.6847 | 0.0003 |
| 36 | 4 | 33 | 1 | 35 | 4 | 32 | 0 | 820.6850 | 820.6847 | 0.0003 |
| 33 | 7 | 26 | 1 | 32 | 7 | 25 | 0 | 820.6957 | 820.6957 | 0.0000 |
| 33 | 8 | 26 | 1 | 32 | 8 | 25 | 0 | 820.6957 | 820.6957 | 0.0000 |
| 30 | 12 | 19 | 1 | 29 | 12 | 18 | 0 | 820.7043 | 820.7044 | -0.0001 |
| 30 | 11 | 19 | 1 | 29 | 11 | 18 | 0 | 820.7043 | 820.7044 | -0.0001 |
| 37 | 2 | 35 | 1 | 36 | 2 | 34 | 0 | 820.7582 | 820.7579 | 0.0003 |
| 37 | 3 | 35 | 1 | 36 | 3 | 34 | 0 | 820.7582 | 820.7579 | 0.0003 |
| 34 | 6 | 28 | 1 | 33 | 6 | 27 | 0 | 820.7700 | 820.7699 | 0.0001 |
| 34 | 7 | 28 | 1 | 33 | 7 | 27 | 0 | 820.7700 | 820.7699 | 0.0001 |
| 31 | 10 | 21 | 1 | 30 | 10 | 20 | 0 | 820.7797 | 820.7795 | 0.0002 |
| 31 | 11 | 21 | 1 | 30 | 11 | 20 | 0 | 820.7797 | 820.7795 | 0.0002 |
| 28 | 14 | 14 | 1 | 27 | 14 | 13 | 0 | 820.7883 | 820.7878 | 0.0005 |
| 38 | 1 | 37 | 1 | 37 | 1 | 36 | 0 | 820.8324 | 820.8306 | 0.0018 |
| 38 | 2 | 37 | 1 | 37 | 2 | 36 | 0 | 820.8324 | 820.8306 | 0.0018 |
| 35 | 6 | 30 | 1 | 34 | 6 | 29 | 0 | 820.8442 | 820.8436 | 0.0006 |
| 35 | 5 | 30 | 1 | 34 | 5 | 29 | 0 | 820.8442 | 820.8436 | 0.0006 |
| 32 | 9 | 23 | 1 | 31 | 9 | 22 | 0 | 820.8539 | 820.8542 | -0.0003 |
| 32 | 10 | 23 | 1 | 31 | 10 | 22 | 0 | 820.8539 | 820.8542 | -0.0003 |
| 29 | 14 | 16 | 1 | 28 | 14 | 15 | 0 | 820.8625 | 820.8628 | -0.0003 |
| 29 | 13 | 16 | 1 | 28 | 13 | 15 | 0 | 820.8625 | 820.8628 | -0.0003 |
| 36 | 5 | 32 | 1 | 35 | 5 | 31 | 0 | 820.9174 | 820.9169 | 0.0005 |
| 36 | 4 | 32 | 1 | 35 | 4 | 31 | 0 | 820.9174 | 820.9169 | 0.0005 |
| 33 | 8 | 25 | 1 | 32 | 8 | 24 | 0 | 820.9282 | 820.9285 | -0.0003 |
| 33 | 9 | 25 | 1 | 32 | 9 | 24 | 0 | 820.9282 | 820.9285 | -0.0003 |
| 30 | 13 | 18 | 1 | 29 | 13 | 17 | 0 | 820.9379 | 820.9379 | 0.0000 |
| 30 | 12 | 18 | 1 | 29 | 12 | 17 | 0 | 820.9379 | 820.9379 | 0.0000 |
| 37 | 3 | 34 | 1 | 36 | 3 | 33 | 0 | 820.9906 | 820.9899 | 0.0007 |
| 37 | 4 | 34 | 1 | 36 | 4 | 33 | 0 | 820.9906 | 820.9899 | 0.0007 |
| 34 | 7 | 27 | 1 | 33 | 7 | 26 | 0 | 821.0024 | 821.0025 | -0.0001 |
| 34 | 8 | 27 | 1 | 33 | 8 | 26 | 0 | 821.0024 | 821.0025 | -0.0001 |
| 31 | 12 | 20 | 1 | 30 | 12 | 19 | 0 | 821.0121 | 821.0127 | -0.0006 |
| 31 | 11 | 20 | 1 | 30 | 11 | 19 | 0 | 821.0121 | 821.0127 | -0.0006 |
| 38 | 2 | 36 | 1 | 37 | 2 | 35 | 0 | 821.0638 | 821.0624 | 0.0014 |
| 38 | 3 | 36 | 1 | 37 | 3 | 35 | 0 | 821.0638 | 821.0624 | 0.0014 |
| 35 | 6 | 29 | 1 | 34 | 6 | 28 | 0 | 821.0756 | 821.0760 | -0.0004 |
| 35 | 7 | 29 | 1 | 34 | 7 | 28 | 0 | 821.0756 | 821.0760 | -0.0004 |
| 32 | 10 | 22 | 1 | 31 | 10 | 21 | 0 | 821.0875 | 821.0872 | 0.0003 |
| 32 | 11 | 22 | 1 | 31 | 11 | 21 | 0 | 821.0875 | 821.0872 | 0.0003 |
| 29 | 14 | 15 | 1 | 28 | 14 | 14 | 0 | 821.0971 | 821.0968 | 0.0003 |
| 36 | 6 | 31 | 1 | 35 | 6 | 30 | 0 | 821.1499 | 821.1492 | 0.0007 |
| 36 | 5 | 31 | 1 | 35 | 5 | 30 | 0 | 821.1499 | 821.1492 | 0.0007 |
| 33 | 9 | 24 | 1 | 32 | 9 | 23 | 0 | 821.1617 | 821.1614 | 0.0003 |
| 33 | 10 | 24 | 1 | 32 | 10 | 23 | 0 | 821.1617 | 821.1614 | 0.0003 |
| 30 | 14 | 17 | 1 | 29 | 14 | 16 | 0 | 821.1714 | 821.1715 | -0.0001 |
| 30 | 13 | 17 | 1 | 29 | 13 | 16 | 0 | 821.1714 | 821.1715 | -0.0001 |
| 37 | 5 | 33 | 1 | 36 | 5 | 32 | 0 | 821.2231 | 821.2220 | 0.0011 |
| 37 | 4 | 33 | 1 | 36 | 4 | 32 | 0 | 821.2231 | 821.2220 | 0.0011 |
| 34 | 8 | 26 | 1 | 33 | 8 | 25 | 0 | 821.2349 | 821.2351 | -0.0002 |
| 34 | 9 | 26 | 1 | 33 | 9 | 25 | 0 | 821.2349 | 821.2351 | -0.0002 |
| 31 | 13 | 19 | 1 | 30 | 13 | 18 | 0 | 821.2457 | 821.2460 | -0.0003 |
| 31 | 12 | 19 | 1 | 30 | 12 | 18 | 0 | 821.2457 | 821.2460 | -0.0003 |
| 38 | 3 | 35 | 1 | 37 | 3 | 34 | 0 | 821.2952 | 821.2943 | 0.0009 |
| 38 | 4 | 35 | 1 | 37 | 4 | 34 | 0 | 821.2952 | 821.2943 | 0.0009 |
| 35 | 7 | 28 | 1 | 34 | 7 | 27 | 0 | 821.3091 | 821.3085 | 0.0006 |
| 35 | 8 | 28 | 1 | 34 | 8 | 27 | 0 | 821.3091 | 821.3085 | 0.0006 |
| 32 | 12 | 21 | 1 | 31 | 12 | 20 | 0 | 821.3199 | 821.3203 | -0.0004 |
| 32 | 11 | 21 | 1 | 31 | 11 | 20 | 0 | 821.3199 | 821.3203 | -0.0004 |
| 36 | 6 | 30 | 1 | 35 | 6 | 29 | 0 | 821.3812 | 821.3815 | -0.0003 |
| 36 | 7 | 30 | 1 | 35 | 7 | 29 | 0 | 821.3812 | 821.3815 | -0.0003 |
| 33 | 10 | 23 | 1 | 32 | 10 | 22 | 0 | 821.3942 | 821.3943 | -0.0001 |
| 33 | 11 | 23 | 1 | 32 | 11 | 22 | 0 | 821.3942 | 821.3943 | -0.0001 |
| 30 | 14 | 16 | 1 | 29 | 14 | 15 | 0 | 821.4049 | 821.4052 | -0.0003 |
| 37 | 6 | 32 | 1 | 36 | 6 | 31 | 0 | 821.4544 | 821.4541 | 0.0003 |
| 37 | 5 | 32 | 1 | 36 | 5 | 31 | 0 | 821.4544 | 821.4541 | 0.0003 |
| 34 | 9 | 25 | 1 | 33 | 9 | 24 | 0 | 821.4673 | 821.4679 | -0.0006 |
| 34 | 10 | 25 | 1 | 33 | 10 | 24 | 0 | 821.4673 | 821.4679 | -0.0006 |
| 31 | 14 | 18 | 1 | 30 | 14 | 17 | 0 | 821.4792 | 821.4794 | -0.0002 |
| 31 | 13 | 18 | 1 | 30 | 13 | 17 | 0 | 821.4792 | 821.4794 | -0.0002 |
| 38 | 5 | 34 | 1 | 37 | 5 | 33 | 0 | 821.5265 | 821.5263 | 0.0002 |
| 38 | 4 | 34 | 1 | 37 | 4 | 33 | 0 | 821.5265 | 821.5263 | 0.0002 |
| 35 | 8 | 27 | 1 | 34 | 8 | 26 | 0 | 821.5405 | 821.5411 | -0.0006 |
| 35 | 9 | 27 | 1 | 34 | 9 | 26 | 0 | 821.5405 | 821.5411 | -0.0006 |
| 32 | 13 | 20 | 1 | 31 | 13 | 19 | 0 | 821.5534 | 821.5535 | -0.0001 |
| 32 | 12 | 20 | 1 | 31 | 12 | 19 | 0 | 821.5534 | 821.5535 | -0.0001 |
| 36 | 7 | 29 | 1 | 35 | 7 | 28 | 0 | 821.6137 | 821.6139 | -0.0002 |
| 36 | 8 | 29 | 1 | 35 | 8 | 28 | 0 | 821.6137 | 821.6139 | -0.0002 |
| 33 | 12 | 22 | 1 | 32 | 12 | 21 | 0 | 821.6266 | 821.6272 | -0.0006 |
| 33 | 11 | 22 | 1 | 32 | 11 | 21 | 0 | 821.6266 | 821.6272 | -0.0006 |
| 40 | 3 | 38 | 1 | 39 | 3 | 37 | 0 | 821.6697 | 821.6696 | 0.0001 |
| 40 | 2 | 38 | 1 | 39 | 2 | 37 | 0 | 821.6697 | 821.6696 | 0.0001 |
| 37 | 6 | 31 | 1 | 36 | 6 | 30 | 0 | 821.6869 | 821.6863 | 0.0006 |
| 37 | 7 | 31 | 1 | 36 | 7 | 30 | 0 | 821.6869 | 821.6863 | 0.0006 |
| 34 | 10 | 24 | 1 | 33 | 10 | 23 | 0 | 821.7009 | 821.7006 | 0.0003 |
| 34 | 11 | 24 | 1 | 33 | 11 | 23 | 0 | 821.7009 | 821.7006 | 0.0003 |
| 31 | 14 | 17 | 1 | 30 | 14 | 16 | 0 | 821.7127 | 821.7130 | -0.0003 |
| 41 | 2 | 40 | 1 | 40 | 2 | 39 | 0 | 821.7418 | 821.7407 | 0.0011 |
| 41 | 1 | 40 | 1 | 40 | 1 | 39 | 0 | 821.7418 | 821.7407 | 0.0011 |
| 38 | 6 | 33 | 1 | 37 | 6 | 32 | 0 | 821.7590 | 821.7583 | 0.0007 |
| 38 | 5 | 33 | 1 | 37 | 5 | 32 | 0 | 821.7590 | 821.7583 | 0.0007 |
| 35 | 9 | 26 | 1 | 34 | 9 | 25 | 0 | 821.7730 | 821.7737 | -0.0007 |
| 35 | 10 | 26 | 1 | 34 | 10 | 25 | 0 | 821.7730 | 821.7737 | -0.0007 |
| 32 | 14 | 19 | 1 | 31 | 14 | 18 | 0 | 821.7870 | 821.7867 | 0.0003 |
| 32 | 13 | 19 | 1 | 31 | 13 | 18 | 0 | 821.7870 | 821.7867 | 0.0003 |
| 42 | 1 | 42 | 1 | 41 | 1 | 41 | 0 | 821.8128 | 821.8115 | 0.0013 |
| 42 | 0 | 42 | 1 | 41 | 0 | 41 | 0 | 821.8128 | 821.8115 | 0.0013 |
| 39 | 5 | 35 | 1 | 38 | 5 | 34 | 0 | 821.8311 | 821.8300 | 0.0011 |
| 39 | 4 | 35 | 1 | 38 | 4 | 34 | 0 | 821.8311 | 821.8300 | 0.0011 |
| 36 | 8 | 28 | 1 | 35 | 8 | 27 | 0 | 821.8461 | 821.8463 | -0.0002 |
| 36 | 9 | 28 | 1 | 35 | 9 | 27 | 0 | 821.8461 | 821.8463 | -0.0002 |
| 33 | 13 | 21 | 1 | 32 | 13 | 20 | 0 | 821.8601 | 821.8602 | -0.0001 |
| 33 | 12 | 21 | 1 | 32 | 12 | 20 | 0 | 821.8601 | 821.8602 | -0.0001 |
| 37 | 7 | 30 | 1 | 36 | 7 | 29 | 0 | 821.9182 | 821.9186 | -0.0004 |
| 37 | 8 | 30 | 1 | 36 | 8 | 29 | 0 | 821.9182 | 821.9186 | -0.0004 |
| 34 | 12 | 23 | 1 | 33 | 12 | 22 | 0 | 821.9333 | 821.9335 | -0.0002 |
| 34 | 11 | 23 | 1 | 33 | 11 | 22 | 0 | 821.9333 | 821.9335 | -0.0002 |
| 38 | 6 | 32 | 1 | 37 | 6 | 31 | 0 | 821.9904 | 821.9904 | 0.0000 |
| 38 | 7 | 32 | 1 | 37 | 7 | 31 | 0 | 821.9904 | 821.9904 | 0.0000 |
| 35 | 10 | 25 | 1 | 34 | 10 | 24 | 0 | 822.0054 | 822.0063 | -0.0009 |
| 35 | 11 | 25 | 1 | 34 | 11 | 24 | 0 | 822.0054 | 822.0063 | -0.0009 |
| 32 | 14 | 18 | 1 | 31 | 14 | 17 | 0 | 822.0194 | 822.0201 | -0.0007 |
| 39 | 6 | 34 | 1 | 38 | 6 | 33 | 0 | 822.0625 | 822.0619 | 0.0006 |
| 39 | 5 | 34 | 1 | 38 | 5 | 33 | 0 | 822.0625 | 822.0619 | 0.0006 |
| 33 | 14 | 20 | 1 | 32 | 14 | 19 | 0 | 822.0926 | 822.0934 | -0.0008 |
| 33 | 13 | 20 | 1 | 32 | 13 | 19 | 0 | 822.0926 | 822.0934 | -0.0008 |
| 43 | 1 | 43 | 1 | 42 | 1 | 42 | 0 | 822.1087 | 822.1129 | -0.0042 |
| 43 | 0 | 43 | 1 | 42 | 0 | 42 | 0 | 822.1087 | 822.1129 | -0.0042 |
| 40 | 5 | 36 | 1 | 39 | 5 | 35 | 0 | 822.1346 | 822.1329 | 0.0017 |
| 40 | 4 | 36 | 1 | 39 | 4 | 35 | 0 | 822.1346 | 822.1329 | 0.0017 |
| 37 | 8 | 29 | 1 | 36 | 8 | 28 | 0 | 822.1507 | 822.1509 | -0.0002 |
| 37 | 9 | 29 | 1 | 36 | 9 | 28 | 0 | 822.1507 | 822.1509 | -0.0002 |
| 34 | 13 | 22 | 1 | 33 | 13 | 21 | 0 | 822.1658 | 822.1664 | -0.0006 |
| 34 | 12 | 22 | 1 | 33 | 12 | 21 | 0 | 822.1658 | 822.1664 | -0.0006 |
| 41 | 4 | 38 | 1 | 40 | 4 | 37 | 0 | 822.2034 | 822.2036 | -0.0002 |
| 41 | 3 | 38 | 1 | 40 | 3 | 37 | 0 | 822.2034 | 822.2036 | -0.0002 |
| 38 | 7 | 31 | 1 | 37 | 7 | 30 | 0 | 822.2228 | 822.2226 | 0.0002 |
| 38 | 8 | 31 | 1 | 37 | 8 | 30 | 0 | 822.2228 | 822.2226 | 0.0002 |
| 42 | 3 | 40 | 1 | 41 | 3 | 39 | 0 | 822.2755 | 822.2740 | 0.0015 |
| 42 | 2 | 40 | 1 | 41 | 2 | 39 | 0 | 822.2755 | 822.2740 | 0.0015 |
| 39 | 6 | 33 | 1 | 38 | 6 | 32 | 0 | 822.2938 | 822.2938 | 0.0000 |
| 39 | 7 | 33 | 1 | 38 | 7 | 32 | 0 | 822.2938 | 822.2938 | 0.0000 |
| 36 | 10 | 26 | 1 | 35 | 10 | 25 | 0 | 822.3110 | 822.3113 | -0.0003 |
| 36 | 11 | 26 | 1 | 35 | 11 | 25 | 0 | 822.3110 | 822.3113 | -0.0003 |
| 33 | 14 | 19 | 1 | 32 | 14 | 18 | 0 | 822.3261 | 822.3266 | -0.0005 |
| 43 | 2 | 42 | 1 | 42 | 2 | 41 | 0 | 822.3455 | 822.3440 | 0.0015 |
| 43 | 1 | 42 | 1 | 42 | 1 | 41 | 0 | 822.3455 | 822.3440 | 0.0015 |
| 40 | 6 | 35 | 1 | 39 | 6 | 34 | 0 | 822.3659 | 822.3647 | 0.0012 |
| 40 | 5 | 35 | 1 | 39 | 5 | 34 | 0 | 822.3659 | 822.3647 | 0.0012 |
| 37 | 9 | 28 | 1 | 36 | 9 | 27 | 0 | 822.3831 | 822.3832 | -0.0001 |
| 37 | 10 | 28 | 1 | 36 | 10 | 27 | 0 | 822.3831 | 822.3832 | -0.0001 |
| 34 | 14 | 21 | 1 | 33 | 14 | 20 | 0 | 822.3993 | 822.3993 | 0.0000 |
| 34 | 13 | 21 | 1 | 33 | 13 | 20 | 0 | 822.3993 | 822.3993 | 0.0000 |
| 41 | 5 | 37 | 1 | 40 | 5 | 36 | 0 | 822.4359 | 822.4352 | 0.0007 |
| 41 | 4 | 37 | 1 | 40 | 4 | 36 | 0 | 822.4359 | 822.4352 | 0.0007 |
| 38 | 8 | 30 | 1 | 37 | 8 | 29 | 0 | 822.4542 | 822.4547 | -0.0005 |
| 38 | 9 | 30 | 1 | 37 | 9 | 29 | 0 | 822.4542 | 822.4547 | -0.0005 |
| 42 | 4 | 39 | 1 | 41 | 4 | 38 | 0 | 822.5058 | 822.5053 | 0.0005 |
| 42 | 3 | 39 | 1 | 41 | 3 | 38 | 0 | 822.5058 | 822.5053 | 0.0005 |
| 39 | 7 | 32 | 1 | 38 | 7 | 31 | 0 | 822.5263 | 822.5259 | 0.0004 |
| 39 | 8 | 32 | 1 | 38 | 8 | 31 | 0 | 822.5263 | 822.5259 | 0.0004 |
| 36 | 12 | 25 | 1 | 35 | 12 | 24 | 0 | 822.5435 | 822.5439 | -0.0004 |
| 36 | 11 | 25 | 1 | 35 | 11 | 24 | 0 | 822.5435 | 822.5439 | -0.0004 |
| 43 | 3 | 41 | 1 | 42 | 3 | 40 | 0 | 822.5769 | 822.5751 | 0.0018 |
| 43 | 2 | 41 | 1 | 42 | 2 | 40 | 0 | 822.5769 | 822.5751 | 0.0018 |
| 40 | 7 | 34 | 1 | 39 | 7 | 33 | 0 | 822.5973 | 822.5966 | 0.0007 |
| 40 | 6 | 34 | 1 | 39 | 6 | 33 | 0 | 822.5973 | 822.5966 | 0.0007 |
| 37 | 10 | 27 | 1 | 36 | 10 | 26 | 0 | 822.6156 | 822.6156 | 0.0000 |
| 37 | 11 | 27 | 1 | 36 | 11 | 26 | 0 | 822.6156 | 822.6156 | 0.0000 |
| 34 | 14 | 20 | 1 | 33 | 14 | 19 | 0 | 822.6317 | 822.6324 | -0.0007 |
| 34 | 15 | 20 | 1 | 33 | 15 | 19 | 0 | 822.6317 | 822.6324 | -0.0007 |
| 38 | 9 | 29 | 1 | 37 | 9 | 28 | 0 | 822.6866 | 822.6870 | -0.0004 |
| 38 | 10 | 29 | 1 | 37 | 10 | 28 | 0 | 822.6866 | 822.6870 | -0.0004 |
| 35 | 14 | 22 | 1 | 34 | 14 | 21 | 0 | 822.7038 | 822.7046 | -0.0008 |
| 35 | 13 | 22 | 1 | 34 | 13 | 21 | 0 | 822.7038 | 822.7046 | -0.0008 |
| 42 | 5 | 38 | 1 | 41 | 5 | 37 | 0 | 822.7361 | 822.7368 | -0.0007 |
| 42 | 4 | 38 | 1 | 41 | 4 | 37 | 0 | 822.7361 | 822.7368 | -0.0007 |
| 39 | 8 | 31 | 1 | 38 | 8 | 30 | 0 | 822.7576 | 822.7579 | -0.0003 |
| 39 | 9 | 31 | 1 | 38 | 9 | 30 | 0 | 822.7576 | 822.7579 | -0.0003 |
| 36 | 13 | 24 | 1 | 35 | 13 | 23 | 0 | 822.7759 | 822.7765 | -0.0006 |
| 36 | 12 | 24 | 1 | 35 | 12 | 23 | 0 | 822.7759 | 822.7765 | -0.0006 |
| 43 | 4 | 40 | 1 | 42 | 4 | 39 | 0 | 822.8082 | 822.8064 | 0.0018 |
| 43 | 3 | 40 | 1 | 42 | 3 | 39 | 0 | 822.8082 | 822.8064 | 0.0018 |
| 40 | 8 | 33 | 1 | 39 | 8 | 32 | 0 | 822.8287 | 822.8285 | 0.0002 |
| 40 | 7 | 33 | 1 | 39 | 7 | 32 | 0 | 822.8287 | 822.8285 | 0.0002 |
| 37 | 12 | 26 | 1 | 36 | 12 | 25 | 0 | 822.8480 | 822.8481 | -0.0001 |
| 37 | 11 | 26 | 1 | 36 | 11 | 25 | 0 | 822.8480 | 822.8481 | -0.0001 |
| 35 | 15 | 21 | 1 | 34 | 15 | 20 | 0 | 822.9374 | 822.9375 | -0.0001 |
| 35 | 14 | 21 | 1 | 34 | 14 | 20 | 0 | 822.9374 | 822.9375 | -0.0001 |
| 39 | 9 | 30 | 1 | 38 | 9 | 29 | 0 | 822.9901 | 822.9900 | 0.0001 |
| 39 | 10 | 30 | 1 | 38 | 10 | 29 | 0 | 822.9901 | 822.9900 | 0.0001 |
| 36 | 14 | 23 | 1 | 35 | 14 | 22 | 0 | 823.0084 | 823.0092 | -0.0008 |
| 36 | 13 | 23 | 1 | 35 | 13 | 22 | 0 | 823.0084 | 823.0092 | -0.0008 |
| 46 | 1 | 46 | 1 | 45 | 1 | 45 | 0 | 823.0159 | 823.0132 | 0.0027 |
| 46 | 0 | 46 | 1 | 45 | 0 | 45 | 0 | 823.0159 | 823.0132 | 0.0027 |
| 43 | 5 | 39 | 1 | 42 | 5 | 38 | 0 | 823.0385 | 823.0377 | 0.0008 |
| 43 | 4 | 39 | 1 | 42 | 4 | 38 | 0 | 823.0385 | 823.0377 | 0.0008 |
| 40 | 9 | 32 | 1 | 39 | 9 | 31 | 0 | 823.0611 | 823.0604 | 0.0007 |
| 40 | 8 | 32 | 1 | 39 | 8 | 31 | 0 | 823.0611 | 823.0604 | 0.0007 |
| 37 | 13 | 25 | 1 | 36 | 13 | 24 | 0 | 823.0805 | 823.0806 | -0.0001 |
| 37 | 12 | 25 | 1 | 36 | 12 | 24 | 0 | 823.0805 | 823.0806 | -0.0001 |
| 34 | 17 | 18 | 1 | 33 | 17 | 17 | 0 | 823.0988 | 823.0989 | -0.0001 |
| 34 | 16 | 18 | 1 | 33 | 16 | 17 | 0 | 823.0988 | 823.0989 | -0.0001 |
| 44 | 4 | 41 | 1 | 43 | 4 | 40 | 0 | 823.1085 | 823.1067 | 0.0018 |
| 44 | 3 | 41 | 1 | 43 | 3 | 40 | 0 | 823.1085 | 823.1067 | 0.0018 |
| 41 | 8 | 34 | 1 | 40 | 8 | 33 | 0 | 823.1311 | 823.1304 | 0.0007 |
| 41 | 7 | 34 | 1 | 40 | 7 | 33 | 0 | 823.1311 | 823.1304 | 0.0007 |
| 38 | 12 | 27 | 1 | 37 | 12 | 26 | 0 | 823.1515 | 823.1516 | -0.0001 |
| 38 | 11 | 27 | 1 | 37 | 11 | 26 | 0 | 823.1515 | 823.1516 | -0.0001 |
| 35 | 16 | 20 | 1 | 34 | 16 | 19 | 0 | 823.1709 | 823.1705 | 0.0004 |
| 35 | 15 | 20 | 1 | 34 | 15 | 19 | 0 | 823.1709 | 823.1705 | 0.0004 |
| 39 | 11 | 29 | 1 | 38 | 11 | 28 | 0 | 823.2215 | 823.2222 | -0.0007 |
| 39 | 10 | 29 | 1 | 38 | 10 | 28 | 0 | 823.2215 | 823.2222 | -0.0007 |
| 43 | 6 | 38 | 1 | 42 | 6 | 37 | 0 | 823.2677 | 823.2691 | -0.0014 |
| 43 | 5 | 38 | 1 | 42 | 5 | 37 | 0 | 823.2677 | 823.2691 | -0.0014 |
| 40 | 10 | 31 | 1 | 39 | 10 | 30 | 0 | 823.2925 | 823.2924 | 0.0001 |
| 40 | 9 | 31 | 1 | 39 | 9 | 30 | 0 | 823.2925 | 823.2924 | 0.0001 |
| 47 | 1 | 47 | 1 | 46 | 1 | 46 | 0 | 823.3119 | 823.3119 | 0.0000 |
| 47 | 0 | 47 | 1 | 46 | 0 | 46 | 0 | 823.3119 | 823.3119 | 0.0000 |
| 37 | 14 | 24 | 1 | 36 | 14 | 23 | 0 | 823.3162 | 823.3132 | 0.0030 |
| 37 | 13 | 24 | 1 | 36 | 13 | 23 | 0 | 823.3162 | 823.3132 | 0.0030 |
| 44 | 5 | 40 | 1 | 43 | 5 | 39 | 0 | 823.3388 | 823.3379 | 0.0009 |
| 44 | 4 | 40 | 1 | 43 | 4 | 39 | 0 | 823.3388 | 823.3379 | 0.0009 |
| 41 | 9 | 33 | 1 | 40 | 9 | 32 | 0 | 823.3624 | 823.3622 | 0.0002 |
| 41 | 8 | 33 | 1 | 40 | 8 | 32 | 0 | 823.3624 | 823.3622 | 0.0002 |
| 38 | 13 | 26 | 1 | 37 | 13 | 25 | 0 | 823.3840 | 823.3840 | 0.0000 |
| 38 | 12 | 26 | 1 | 37 | 12 | 25 | 0 | 823.3840 | 823.3840 | 0.0000 |
| 45 | 4 | 42 | 1 | 44 | 4 | 41 | 0 | 823.4033 | 823.4064 | -0.0031 |
| 45 | 3 | 42 | 1 | 44 | 3 | 41 | 0 | 823.4033 | 823.4064 | -0.0031 |
| 42 | 8 | 35 | 1 | 41 | 8 | 34 | 0 | 823.4335 | 823.4316 | 0.0019 |
| 42 | 7 | 35 | 1 | 41 | 7 | 34 | 0 | 823.4335 | 823.4316 | 0.0019 |
| 39 | 12 | 28 | 1 | 38 | 12 | 27 | 0 | 823.4550 | 823.4544 | 0.0006 |
| 39 | 11 | 28 | 1 | 38 | 11 | 27 | 0 | 823.4550 | 823.4544 | 0.0006 |
| 43 | 7 | 37 | 1 | 42 | 7 | 36 | 0 | 823.4970 | 823.5006 | -0.0036 |
| 43 | 6 | 37 | 1 | 42 | 6 | 36 | 0 | 823.4970 | 823.5006 | -0.0036 |
| 40 | 11 | 30 | 1 | 39 | 11 | 29 | 0 | 823.5239 | 823.5245 | -0.0006 |
| 40 | 10 | 30 | 1 | 39 | 10 | 29 | 0 | 823.5239 | 823.5245 | -0.0006 |
| 41 | 10 | 32 | 1 | 40 | 10 | 31 | 0 | 823.5938 | 823.5941 | -0.0003 |
| 41 | 9 | 32 | 1 | 40 | 9 | 31 | 0 | 823.5938 | 823.5941 | -0.0003 |
| 46 | 4 | 43 | 1 | 45 | 4 | 42 | 0 | 823.7079 | 823.7053 | 0.0026 |
| 46 | 3 | 43 | 1 | 45 | 3 | 42 | 0 | 823.7079 | 823.7053 | 0.0026 |
| 44 | 7 | 38 | 1 | 43 | 7 | 37 | 0 | 823.7994 | 823.8006 | -0.0012 |
| 44 | 6 | 38 | 1 | 43 | 6 | 37 | 0 | 823.7994 | 823.8006 | -0.0012 |
| 45 | 6 | 40 | 1 | 44 | 6 | 39 | 0 | 823.8693 | 823.8686 | 0.0007 |
| 45 | 5 | 40 | 1 | 44 | 5 | 39 | 0 | 823.8693 | 823.8686 | 0.0007 |

Table S2

|  | **0** | **A** | ***B*** | ***C*** | ***J*** | ***JK*** | ***K*** |
| --- | --- | --- | --- | --- | --- | --- | --- |
| **0** | 1 | -0.2599 | -0.19794 | -0.48584 | 0.289447 | 0.249238 | 0.145853 |
| A | -0.2599 | 1 | -0.79873 | -0.00411 | -0.00779 | 0.084446 | -0.48766 |
| B | -0.19794 | -0.79873 | 1 | 0.037882 | 0.054449 | -0.34086 | 0.23327 |
| C | -0.48584 | -0.00411 | 0.037882 | 1 | -0.88823 | 0.09671 | 0.161941 |
| ***J*** | 0.289447 | -0.00779 | 0.054449 | -0.88823 | 1 | -0.46537 | 0.075642 |
| ***JK*** | 0.249238 | 0.084446 | -0.34086 | 0.09671 | -0.46537 | 1 | -0.56758 |
| ***K*** | 0.145853 | -0.48766 | 0.23327 | 0.161941 | 0.075642 | -0.56758 | 1 |
